# Supplementary material for: An in-depth report of quality control on Kato-Katz and data entry in four clinical trials evaluating the efficacy of albendazole against soil-transmitted helminth infections
Source: PubMed Central journal article supplement (PMC7549791; doi:10.1371/journal.pntd.0008625), 2020-09-21
Supplement: pntd.0008625.s002.pdf [file pntd.0008625.s002.pdf]

# RF 02: Kato-Katz Examination

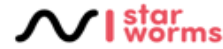

Study: OPP1120972

Date of examination (DD/MMM/YYYY):

/  /  2 0 1 7

Baseline  Follow up

| Subject ID (LAXXX)                                                                      | Slide A/B | Number of <i>Ascaris</i> eggs (XXXX)                                                | Number of <i>Trichuris</i> eggs (XXX)                          | Number of Hookworm eggs (XXX)                                  | Time to read slide (min:sec)                | Initials of the examiner (XXX)                                 | Selected for stool preservation? *                       |
|-----------------------------------------------------------------------------------------|-----------|-------------------------------------------------------------------------------------|----------------------------------------------------------------|----------------------------------------------------------------|---------------------------------------------|----------------------------------------------------------------|----------------------------------------------------------|
| B R <input type="text"/> <input type="text"/> <input type="text"/> <input type="text"/> | A         | <input type="text"/> <input type="text"/> <input type="text"/> <input type="text"/> | <input type="text"/> <input type="text"/> <input type="text"/> | <input type="text"/> <input type="text"/> <input type="text"/> | <input type="text"/> : <input type="text"/> | <input type="text"/> <input type="text"/> <input type="text"/> | <input type="checkbox"/> Yes <input type="checkbox"/> No |
|                                                                                         | B         | <input type="text"/> <input type="text"/> <input type="text"/> <input type="text"/> | <input type="text"/> <input type="text"/> <input type="text"/> | <input type="text"/> <input type="text"/> <input type="text"/> | <input type="text"/> : <input type="text"/> | <input type="text"/> <input type="text"/> <input type="text"/> |                                                          |
| B R <input type="text"/> <input type="text"/> <input type="text"/> <input type="text"/> | A         | <input type="text"/> <input type="text"/> <input type="text"/> <input type="text"/> | <input type="text"/> <input type="text"/> <input type="text"/> | <input type="text"/> <input type="text"/> <input type="text"/> | <input type="text"/> : <input type="text"/> | <input type="text"/> <input type="text"/> <input type="text"/> | <input type="checkbox"/> Yes <input type="checkbox"/> No |
|                                                                                         | B         | <input type="text"/> <input type="text"/> <input type="text"/> <input type="text"/> | <input type="text"/> <input type="text"/> <input type="text"/> | <input type="text"/> <input type="text"/> <input type="text"/> | <input type="text"/> : <input type="text"/> | <input type="text"/> <input type="text"/> <input type="text"/> |                                                          |
| B R <input type="text"/> <input type="text"/> <input type="text"/> <input type="text"/> | A         | <input type="text"/> <input type="text"/> <input type="text"/> <input type="text"/> | <input type="text"/> <input type="text"/> <input type="text"/> | <input type="text"/> <input type="text"/> <input type="text"/> | <input type="text"/> : <input type="text"/> | <input type="text"/> <input type="text"/> <input type="text"/> | <input type="checkbox"/> Yes <input type="checkbox"/> No |
|                                                                                         | B         | <input type="text"/> <input type="text"/> <input type="text"/> <input type="text"/> | <input type="text"/> <input type="text"/> <input type="text"/> | <input type="text"/> <input type="text"/> <input type="text"/> | <input type="text"/> : <input type="text"/> | <input type="text"/> <input type="text"/> <input type="text"/> |                                                          |
| B R <input type="text"/> <input type="text"/> <input type="text"/> <input type="text"/> | A         | <input type="text"/> <input type="text"/> <input type="text"/> <input type="text"/> | <input type="text"/> <input type="text"/> <input type="text"/> | <input type="text"/> <input type="text"/> <input type="text"/> | <input type="text"/> : <input type="text"/> | <input type="text"/> <input type="text"/> <input type="text"/> | <input type="checkbox"/> Yes <input type="checkbox"/> No |
|                                                                                         | B         | <input type="text"/> <input type="text"/> <input type="text"/> <input type="text"/> | <input type="text"/> <input type="text"/> <input type="text"/> | <input type="text"/> <input type="text"/> <input type="text"/> | <input type="text"/> : <input type="text"/> | <input type="text"/> <input type="text"/> <input type="text"/> |                                                          |
| B R <input type="text"/> <input type="text"/> <input type="text"/> <input type="text"/> | A         | <input type="text"/> <input type="text"/> <input type="text"/> <input type="text"/> | <input type="text"/> <input type="text"/> <input type="text"/> | <input type="text"/> <input type="text"/> <input type="text"/> | <input type="text"/> : <input type="text"/> | <input type="text"/> <input type="text"/> <input type="text"/> | <input type="checkbox"/> Yes <input type="checkbox"/> No |
|                                                                                         | B         | <input type="text"/> <input type="text"/> <input type="text"/> <input type="text"/> | <input type="text"/> <input type="text"/> <input type="text"/> | <input type="text"/> <input type="text"/> <input type="text"/> | <input type="text"/> : <input type="text"/> | <input type="text"/> <input type="text"/> <input type="text"/> |                                                          |

\* During baseline examination, only stool samples found to contain at least 13 eggs on duplicate Kato-Katz or at least 15 eggs on Mini-FLOTAC for at least one of the three STH need to be preserved. During follow-up examination, all samples need to be conserved (See SOP 11).

Signature investigator: \_\_\_\_\_

Date (DD/MMM/YYYY)

/  /  2 0 1 7

# RF 03: Kato Katz Quality Control

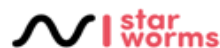

Study: OPP1120972

Date of Quality Control (DD/MMM/YYYY):  /  / 2017

| Subject ID<br>(XXXXX)                                              | Slide | Number of <i>Ascaris</i> eggs<br>(XXXX) |                      |                                                             | Number of <i>Trichuris</i> eggs<br>(XXX) |                      |                                                             | Number of Hookworm eggs<br>(XXX) |                      |                                                             | Initials of<br>2 <sup>nd</sup><br>examiner<br>(XXX) |
|--------------------------------------------------------------------|-------|-----------------------------------------|----------------------|-------------------------------------------------------------|------------------------------------------|----------------------|-------------------------------------------------------------|----------------------------------|----------------------|-------------------------------------------------------------|-----------------------------------------------------|
|                                                                    |       | Quality control exam.                   | First exam.          | Meeting quality criteria*                                   | Quality control exam.                    | First exam.          | Meeting quality criteria*                                   | Quality control exam.            | First exam.          | Meeting quality criteria*                                   |                                                     |
| B R <input type="text"/> <input type="text"/> <input type="text"/> | A     | <input type="text"/>                    | <input type="text"/> | <input type="checkbox"/> Yes<br><input type="checkbox"/> No | <input type="text"/>                     | <input type="text"/> | <input type="checkbox"/> Yes<br><input type="checkbox"/> No | <input type="text"/>             | <input type="text"/> | <input type="checkbox"/> Yes<br><input type="checkbox"/> No | <input type="text"/>                                |
|                                                                    | B     | <input type="text"/>                    | <input type="text"/> | <input type="checkbox"/> Yes<br><input type="checkbox"/> No | <input type="text"/>                     | <input type="text"/> | <input type="checkbox"/> Yes<br><input type="checkbox"/> No | <input type="text"/>             | <input type="text"/> | <input type="checkbox"/> Yes<br><input type="checkbox"/> No | <input type="text"/>                                |
| B R <input type="text"/> <input type="text"/> <input type="text"/> | A     | <input type="text"/>                    | <input type="text"/> | <input type="checkbox"/> Yes<br><input type="checkbox"/> No | <input type="text"/>                     | <input type="text"/> | <input type="checkbox"/> Yes<br><input type="checkbox"/> No | <input type="text"/>             | <input type="text"/> | <input type="checkbox"/> Yes<br><input type="checkbox"/> No | <input type="text"/>                                |
|                                                                    | B     | <input type="text"/>                    | <input type="text"/> | <input type="checkbox"/> Yes<br><input type="checkbox"/> No | <input type="text"/>                     | <input type="text"/> | <input type="checkbox"/> Yes<br><input type="checkbox"/> No | <input type="text"/>             | <input type="text"/> | <input type="checkbox"/> Yes<br><input type="checkbox"/> No | <input type="text"/>                                |
| Comments:                                                          |       |                                         |                      |                                                             |                                          |                      |                                                             |                                  |                      |                                                             |                                                     |

\*No false negatives/positives; difference in egg counts:  $\leq 10$  eggs difference when the total number of eggs counted  $\leq 100$  eggs (not eggs per gram of stool, but number of eggs counted under the microscope) or  $\leq 20\%$  when more than 100 eggs are counted. If sample does not meet these quality criteria, please follow the protocol described in SOP 10.

Signature investigator : \_\_\_\_\_ Date (DD/MMM/YYYY) :  /  / 2017
