# Supplementary material for: An in-depth report of quality control on Kato-Katz and data entry in four clinical trials evaluating the efficacy of albendazole against soil-transmitted helminth infections
Source: PubMed Central journal article supplement (PMC7549791; doi:10.1371/journal.pntd.0008625), 2020-09-21
Supplement: pntd.0008625.s005.pdf [file pntd.0008625.s005.pdf]

## Comparison of Double Entered Data

### 1. Purpose

In the Starworms study, all raw data are entered into excel files, the Data Entry Files (DEFs), using double data entry policy, i.e. all data are entered by two independent data entry clerks.

This SOP describes the procedures to identify discrepancies between the different DEFs that have been generated during the double data entry process.

### 2. Equipment

- Personal Computer or laptop with Excel

### 3. Forms and files

|                                                                 |  |
|-----------------------------------------------------------------|--|
| RF 01, RF 02, RF 04, RF 05, RF 07, RF 08                        |  |
| DEF 01_PersonA, DEF01_PersonB, DEF 03_PersonA and DEF03_PersonB |  |

### 4. Procedures

#### 4.1. Installation of the 'Inquire' add-in in Excel

1. Open Excel, click on 'options' under 'file'. A new window opens.
2. On the left hand side, choose 'Add-ins'.

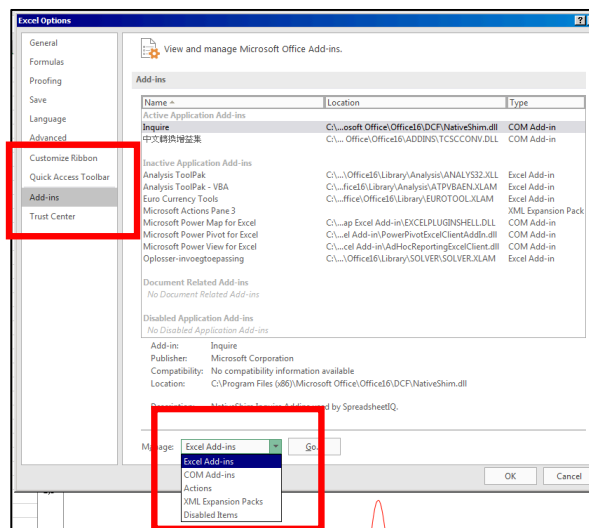

3. In the 'Manage' dropdown menu, select 'COM Add-Ins' and click on 'Go'.

4. Thick 'Inquire' and click on 'OK'.

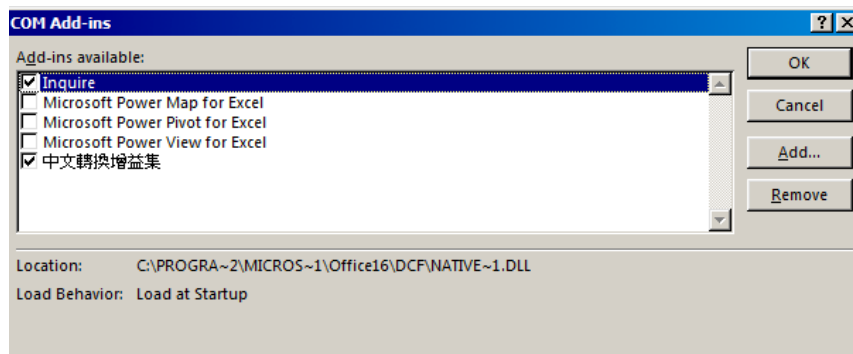

#### 4.2. Comparing two DEFs.

1. Open the two files that you want to compare for inconsistencies, e.g. DEF01\_PersonA\_20160901 and DEF01\_PersonB\_20160901.
2. Choose 'Compare Files' under the Inquire add-in: a dropdown list will show you all opened files. Choose the two files that you want to compare and click on 'Compare'.

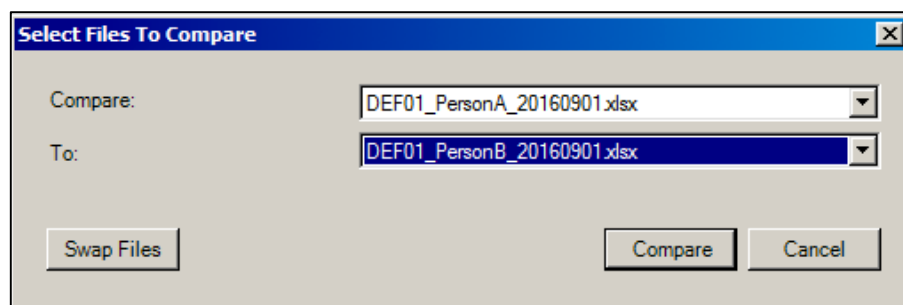

3. A new document, divided in 5 parts, opens:
  - (i) above, left, you see the data from one DEF
  - (ii) above, right, you see the data from the other DEF
  - (iii) below, in the middle, you see the list with all inconsistencies between the two files
  - (iv) below, left, you see the color code explaining the type of inconsistencies
  - (v) below, right, you see some statistics.

In the title bar, you see which DEF is on the left and the right.

The inconsistencies are marked throughout the document. In the example below, two inconsistencies are shown: *Trichuris* counts of Kato-Katz slide A for TA001 and *Trichuris* counts of Kato-Katz slide B for TA010.

Spreadsheet Compare - File 1: [DEF01\_PersonA\_20160901.xlsx] - File 2: [DEF01\_PersonB\_20160901.xlsx]

Home | Compare Files | Show Details | Show Formulas | Resize Cells to Fit | Show Workbook Formatting | Export Results | Copy Results to Clipboard | Options | Help

|    | A           | B       | C         | D        | E       | F         | G        | H           | I          | J         |
|----|-------------|---------|-----------|----------|---------|-----------|----------|-------------|------------|-----------|
| 1  | Kato Katz B |         |           |          |         |           |          |             |            |           |
| 2  | Slide A     |         |           |          |         | Slide B   |          |             |            |           |
| 3  | Subject ID  | Ascaris | Trichuris | Hookworm | Ascaris | Trichuris | Hookworm | Was stool s | Evaluation | Number of |
| 4  | TA001       | 49      | 157       | 0        | 53      | 145       | 0        | YES         | OK         | 0         |
| 5  | TA002       | 0       | 17        | 0        | 0       | 16        | 0        | YES         | OK         | 0         |
| 6  | TA003       | 195     | 102       | 5        | 187     | 97        | 2        | YES         | OK         | 0         |
| 7  | TA004       | 130     | 113       | 0        | 124     | 104       | 0        | YES         | OK         | 0         |
| 8  | TA005       | 0       | 233       | 0        | 0       | 257       | 0        | YES         | OK         | 0         |
| 9  | TA006       | 0       | 31        | 0        | 0       | 35        | 0        | YES         | OK         | 0         |
| 10 | TA007       | 0       | 42        | 0        | 0       | 54        | 0        | YES         | OK         | 0         |
| 11 | TA008       | 0       | 81        | 0        | 0       | 77        | 0        | YES         | OK         | 0         |
| 12 | TA009       | 103     | 16        | 0        | 116     | 13        | 0        | YES         | OK         | 0         |
| 13 | TA010       | 0       | 337       | 3        | 0       | 337       | 3        | YES         | OK         | 0         |
| 14 | TA011       | 0       | 19        | 0        | 0       | 23        | 0        | YES         | OK         | 0         |
| 15 | TA012       | 793     | 64        | 0        | 754     | 77        | 0        | YES         | OK         | 0         |
| 16 | TA013       | 555     | 23        | 0        | 552     | 21        | 0        | YES         | OK         | 0         |
| 17 | TA014       | 112     | 3         | 0        | 120     | 10        | 0        | YES         | OK         | 0         |
| 18 | TA015       | 231     | 70        | 12       | 157     | 39        | 8        | YES         | OK         | 0         |
| 19 | TA016       | 0       | 58        | 1        | 0       | 89        | 0        | YES         | OK         | 0         |
| 20 | TA017       | 423     | 39        | 0        | 1069    | 37        | 3        | YES         | OK         | 0         |
| 21 | TA018       | 0       | 225       | 0        | 0       | 213       | 0        | YES         | OK         | 0         |
| 22 | TA019       | 65      | 42        | 10       | 94      | 64        | 3        | YES         | OK         | 0         |
| 23 | TA020       | 897     | 318       | 5        | 886     | 299       | 2        | YES         | OK         | 0         |
| 24 | TA021       | 483     | 32        | 0        | 499     | 55        | 0        | YES         | OK         | 0         |
| 25 | TA022       | 1024    | 83        | 0        | 1031    | 98        | 0        | YES         | OK         | 0         |
| 26 | TA023       | 13      | 6         | 0        | 24      | 5         | 0        | YES         | OK         | 0         |
| 27 | TA024       | 0       | 79        | 0        | 0       | 88        | 0        | YES         | OK         | 0         |
| 28 | TA025       | 1110    | 97        | 10       | 1211    | 106       | 19       | YES         | OK         | 0         |
| 29 | TA026       | 306     | 98        | 0        | 315     | 99        | 0        | YES         | OK         | 0         |
| 30 | TA027       | 0       | 38        | 30       | 0       | 41        | 34       | YES         | OK         | 0         |
| 31 | TA028       | 3660    | 616       | 0        | 4852    | 466       | 2        | YES         | OK         | 0         |
| 32 | TA029       | 0       | 21        | 8        | 0       | 23        | 7        | YES         | OK         | 0         |

Ready - File 1: [DEF01\_PersonA\_20160901.xlsx] - File 2: [DEF01\_PersonB\_20160901.xlsx] - Total Displayed Items: 6

Enable Option:  Select All,  Entered Values,  Calculated Values,  Formulas,  SysGen Formulas,  SysGen Formulas Errors,  Structural,  Names,  SysGen Names,  SysGen Names Error,  Names

| Sheet                       | Cell | Value 1 | Value 2 | Change Description     |
|-----------------------------|------|---------|---------|------------------------|
| Baseline KK Results (RF 02) | C4   | 149     | 154     | Entered Value Changed. |
| Baseline KK Results (RF 02) | C199 | 29      | 92      | Entered Value Changed. |
| Baseline KK Results (RF 02) | F13  | 357     | 358     | Entered Value Changed. |
| Baseline KK Results (RF 02) | F213 | 205     | 502     | Entered Value Changed. |
| FollowUP KK Results (RF 02) | F6   | 121     | 221     | Entered Value Changed. |
| FollowUP KK Results (RF 02) | F11  | 27      | 72      | Entered Value Changed. |

Count: 6  
Entered Value, Calculated Value, Formulas, SysGen Formulas, SysGen Formulas (Errors), Structural, Names, SysGen Names, SysGen Names (Errors), Data Connections, Cell Formulas, Cell Restrictions, Workbook Protection

4. Save one of the DEFs as 'DEF01\_PersonC\_QC'.

5. Identify all inconsistencies between the 2 DEFs, check the correct values in the raw data, i.e. the different Record Forms, and correct in the 'DEF01\_PersonC\_QC' if necessary.
