# Supplementary material for: An in-depth report of quality control on Kato-Katz and data entry in four clinical trials evaluating the efficacy of albendazole against soil-transmitted helminth infections
Source: PLoS Negl Trop Dis. 2020 Sep 21;14(9):e0008625. doi: 10.1371/journal.pntd.0008625 (PMC7549791; doi:10.1371/journal.pntd.0008625)
Supplement: S6 Info — (XLSX) [file pntd.0008625.s006.xlsx]

## Sheet: BRA
SubjectID	Age	Sex	BL_KKA_AL	BL_KKA_AL_QC	BL_KKA_AL_postQC	BL_KKA_TT	BL_KKA_TT_QC	BL_KKA_TT_postQC	BL_KKA_HW	BL_KKA_HW_QC	BL_KKA_HW_postQC	BL_KKB_AL	BL_KKB_AL_QC	BL_KKB_AL_PostQC	BL_KKB_TT	BL_KKB_TT_QC	BL_KKB_TT_postQC	BL_KKB_HW	BL_KKB_HW_QC	BL_KKB_HW_postQC	FU_KKA_AL	FU_KKA_AL_QC	FU_KKA_AL_postQC	FU_KKA_TT	FU_KKA_TT_QC	FU_KKA_TT_postQC	FU_KKA_HW	FU_KKA_HW_QC	FU_KKA_HW_postQC	FU_KKB_AL	FU_KKB_AL_QC	FU_KKB_AL_PostQC	FU_KKB_TT	FU_KKB_TT_QC	FU_KKB_TT_postQC	FU_KKB_HW	FU_KKB_HW_QC	FU_KKB_HW_postQC
BR001	13	1	0		0	0		0	0		0	0		0	0		0	0		0
BR002	14	2	0		0	0		0	0		0	0		0	0		0	0		0
BR003	7	1	0		0	0		0	0		0	0		0	0		0	0		0
BR004	10	2	0		0	0		0	0		0	0		0	0		0	0		0
BR005	5	2	0		0	0		0	0		0	0		0	0		0	0		0
BR006	10	1	0		0	0		0	0		0	0		0	0		0	0		0
BR007	12	2	0		0	0		0	0		0	0		0	0		0	0		0
BR008	14	1	2		2	0		0	3		3	4		4	0		0	3		3	0		0	0		0	0		0	0		0	0		0	0		0
BR009	13	2	0		0	0		0	0		0	0		0	0		0	0		0
BR010	8	2	0		0	0		0	0		0	0		0	0		0	0		0
BR011	12	2	0		0	0		0	0		0	0		0	0		0	0		0
BR012	9	2	1127		1127	0		0	0		0	1061		1061	0		0	0		0	0		0	0		0	0		0	0		0	0		0	0		0
BR013	13	2	110	115	110	0	0	0	0	0	0	141	161	141	0	0	0	0	0	0	0		0	0		0	0		0	0		0	0		0	0		0
BR014	13	2	1166		1166	0		0	0		0	892		892	0		0	0		0	0		0	0		0	0		0	0		0	0		0	0		0
BR015	7	2	3228		3228	0		0	0		0	2788		2788	0		0	0		0	0		0	0		0	0		0	0		0	0		0	0		0
BR016	13	2	1730		1730	0		0	0		0	1964		1964	0		0	0		0	0		0	0		0	0		0	0		0	0		0	0		0
BR017	14	1	0		0	0		0	0		0	0		0	0		0	0		0
BR018	6	1	1803		1803	0		0	0		0	1986		1986	0		0	0		0	0		0	0		0	0		0	0		0	0		0	0		0
BR019	7	1	409	337	409	0	0	0	0	0	0	603	637	603	0	0	0	0	0	0
BR020	10	1	1776		1776	0		0	0		0	1696		1696	0		0	0		0	0		0	0		0	0		0	0		0	0		0	0		0
BR021	7	1	0		0	0		0	0		0	0		0	0		0	0		0	0		0	0		0	0		0	0		0	0		0	0		0
BR022	11	2	0		0	0		0	0		0	0		0	0		0	0		0
BR023	9	1	0		0	0		0	0		0	0		0	0		0	0		0
BR024	6	2	4668		4668	0		0	0		0	4312		4312	0		0	0		0
BR025	13	1	1510		1510	0		0	0		0	2000		2000	0		0	0		0	0		0	0		0	0		0	0		0	0		0	0		0
BR026	9	2	0		0	0		0	0		0	0		0	0		0	0		0
BR027	8	2	3562		3562	0		0	0		0	3204		3204	0		0	0		0	0		0	0		0	0		0	0		0	0		0	0		0
BR028	12	2	0		0	0		0	0		0	0		0	0		0	0		0
BR029	10	2	3524		3524	0		0	0		0	3292		3292	0		0	0		0	0		0	0		0	0		0	0		0	0		0	0		0
BR030	6	1	2242		2242	0		0	13		13	2688		2688	0		0	12		12	0		0	0		0	0		0	0		0	0		0	0		0
BR031	8	2	548		548	0		0	0		0	61		61	0		0	0		0	0		0	0		0	0		0	0		0	0		0	0		0
BR032	7	1	0		0	0		0	0		0	0		0	0		0	0		0
BR033	6	2	430		430	0		0	0		0	242		242	0		0	0		0	0		0	0		0	0		0	0		0	0		0	0		0
BR034	6	2	103	91	103	0	0	0	0	0	0	89	107	89	0	0	0	0	0	0	0		0	0		0	0		0	0		0	0		0	0		0
BR035	9	1	0		0	0		0	0		0	0		0	0		0	0		0
BR036	11	2	0		0	0		0	0		0	0		0	0		0	0		0
BR037	13	1	0		0	0		0	0		0	0		0	0		0	0		0
BR038	7	1	0	0	0	0	0	0	0	0	0	0	0	0	0	0	0	0	0	0
BR039	5	1	0		0	0		0	0		0	0		0	0		0	0		0
BR040	8	1	0		0	0		0	0		0	0		0	0		0	0		0
BR041	12	1	0		0	0		0	0		0	0		0	0		0	0		0
BR042	10	1	0		0	0		0	0		0	0		0	0		0	0		0
BR043	12	2	0		0	0		0	0		0	0		0	0		0	0		0
BR044	5	1	2078		2078	0		0	0		0	2284		2284	0		0	0		0	0		0	0		0	0		0	0		0	0		0	0		0
BR045	13	2	434		434	0		0	6		6	578		578	0		0	11		11	0		0	0		0	0		0	0		0	0		0	0		0
BR046	6	1	0		0	0		0	0		0	0		0	0		0	0		0
BR047	9	2	0		0	0		0	0		0	0		0	0		0	0		0
BR048	10	2	0		0	0		0	0		0	0		0	0		0	0		0
BR049	11	2	0		0	0		0	3		3	0		0	0		0	7		7	0		0	0		0	0		0	0		0	0		0	0		0
BR050	5	1	809		809	0		0	6		6	670		670	0		0	4		4	0		0	0		0	0		0	0		0	0		0	0		0
BR051	13	1	0		0	0		0	0		0	0		0	0		0	0		0
BR052	8	2	0		0	0		0	0		0	0		0	0		0	0		0
BR053	5	2	0		0	0		0	0		0	0		0	0		0	0		0	0		0	0		0	0		0	0		0	0		0	0		0
BR054	5	1	1092	1028	1092	0	0	0	0	0	0	1270	1740	1740	0	0	0	0	0	0	0		0	0		0	0		0	0		0	0		0	0		0
BR055	11	2	0		0	0		0	0		0	0		0	0		0	0		0
BR056	9	2	386		386	0		0	16		16	278		278	0		0	24		24	0		0	0		0	0		0	0		0	0		0	0		0
BR057	6	2	0		0	0		0	1		1	0		0	0		0	4		4	0		0	0		0	0		0	0		0	0		0	0		0
BR058	6	1	0		0	0		0	0		0	0		0	0		0	0		0
BR059	9	2	338	513	513	0	0	0	9	11	9	498	438	498	0	0	0	5	5	5	0		0	0		0	0		0	0		0	0		0	0		0
BR060	11	1	0		0	0		0	0		0	0		0	0		0	0		0
BR061	13	2	0		0	0		0	0		0	0		0	0		0	0		0
BR062	8	2	0		0	0		0	0		0	0		0	0		0	0		0
BR063	9	1	0		0	0		0	0		0	0		0	0		0	0		0
BR064	11	2	0	0	0	0	0	0	0	0	0	0	0	0	0	0	0	0	0	0
BR065	14	2	0		0	0		0	0		0	0		0	0		0	0		0
BR066	13	1	0		0	0		0	0		0	0		0	0		0	0		0
BR067	9	1	0		0	0		0	0		0	0		0	0		0	0		0
BR068	9	1	0		0	0		0	0		0	0		0	0		0	0		0
BR069	8	1	0		0	0		0	0		0	0		0	0		0	0		0
BR070	12	1	0		0	0		0	0		0	0		0	0		0	0		0
BR071	8	2	0		0	0		0	0		0	0		0	0		0	0		0
BR072	7	1	0		0	0		0	0		0	0		0	0		0	0		0
BR073	11	2	0		0	0		0	0		0	0		0	0		0	0		0
BR074	8	1	0		0	0		0	0		0	0		0	0		0	0		0
BR075	11	2	50		50	0		0	0		0	39		39	0		0	0		0	0		0	0		0	0		0	0		0	0		0	0		0
BR076	13	2	0	0	0	0	0	0	0	0	0	0	0	0	0	0	0	0	0	0
BR077	5	1	0		0	0		0	0		0	0		0	0		0	0		0
BR078	6	1	0		0	0		0	0		0	0		0	0		0	0		0
BR079	8	1	0	0	0	0	0	0	0	0	0	0	0	0	0	0	0	0	0	0
BR080	6	2	0	0	0	0	0	0	0	0	0	0	0	0	0	0	0	0	0	0
BR081	8	1	0		0	0		0	0		0	0		0	0		0	0		0
BR082	6	1	0		0	0		0	0		0	0		0	0		0	0		0
BR083	10	2	0		0	0		0	0		0	0		0	0		0	0		0
BR084	6	2	0		0	0		0	0		0	0		0	0		0	0		0
BR085	13	1	0		0	0		0	0		0	0		0	0		0	0		0
BR086	12	2	0		0	0		0	0		0	0		0	0		0	0		0
BR087	13	1	0		0	0		0	0		0	0		0	0		0	0		0
BR088	13	2	0		0	0		0	0		0	0		0	0		0	0		0
BR089	11	1	0		0	0		0	0		0	0		0	0		0	0		0
BR090	14	2	0		0	0		0	0		0	0		0	0		0	0		0
BR091	7	2	0		0	0		0	0		0	0		0	0		0	0		0
BR092	9	2	0		0	0		0	0		0	0		0	0		0	0		0
BR093	7	2	0		0	0		0	0		0	0		0	0		0	0		0
BR094	9	2	0	0	0	0	0	0	0	0	0	0	0	0	0	0	0	0	0	0
BR095	9	2	0	0	0	0	0	0	0	0	0	0	0	0	0	0	0	0	0	0
BR096	14	1	7		7	0		0	0		0	5		5	0		0	0		0	0		0	0		0	0		0	0		0	0		0	0		0
BR097	13	1	0		0	0		0	0		0	0		0	0		0	0		0
BR098	12	1	0		0	0		0	0		0	0		0	0		0	0		0
BR099	10	2	0		0	0		0	0		0	0		0	0		0	0		0
BR100	13	1	0		0	0		0	0		0	0		0	0		0	0		0
BR101	12	1	0		0	0		0	0		0	0		0	0		0	0		0
BR102	12	2	0		0	0		0	0		0	0		0	0		0	0		0
BR103	14	2	0		0	0		0	0		0	0		0	0		0	0		0
BR104	11	1	0		0	0		0	0		0	0		0	0		0	0		0
BR105	14	1	0		0	0		0	0		0	0		0	0		0	0		0
BR106	10	2	0		0	0		0	0		0	0		0	0		0	0		0
BR107	14	1	0	0	0	0	0	0	0	0	0	0	0	0	0	0	0	0	0	0
BR108	11	1	0		0	0		0	0		0	0		0	0		0	0		0
BR109	11	1	0		0	0		0	0		0	0		0	0		0	0		0
BR110	13	1	0		0	0		0	0		0	0		0	0		0	0		0
BR111	5	2	0		0	0		0	0		0	0		0	0		0	0		0
BR112	14	1	17		17	0		0	0		0	23		23	0		0	0		0	0		0	0		0	0		0	0		0	0		0	0		0
BR113	14	2	0		0	0		0	0		0	0		0	0		0	0		0
BR114	11	1	0		0	0		0	0		0	0		0	0		0	0		0
BR115	9	2	0		0	0		0	0		0	0		0	0		0	0		0
BR116	9	1	0		0	0		0	0		0	0		0	0		0	0		0
BR117	6	1	0		0	0		0	0		0	0		0	0		0	0		0
BR118	8	2	0		0	0		0	0		0	0		0	0		0	0		0
BR119	8	2	0		0	0		0	0		0	0		0	0		0	0		0
BR120	11	2	0		0	0		0	0		0	0		0	0		0	0		0
BR121	13	1	0		0	0		0	0		0	0		0	0		0	0		0
BR122	10	1	0		0	0		0	0		0	0		0	0		0	0		0
BR123	10	2	0		0	0		0	2		2	0		0	0		0	3		3	0		0	0		0	0		0	0		0	0		0	0		0
BR124	12	1	0		0	0		0	6		6	0		0	0		0	4		4	0		0	0		0	0		0	0		0	0		0	2		2
BR125	14	2	0		0	0		0	0		0	0		0	0		0	0		0
BR126	7	1	0		0	0		0	0		0	0		0	0		0	0		0
BR127	12	1	0		0	0		0	0		0	0		0	0		0	0		0
BR128	7	1	0		0	0		0	0		0	0		0	0		0	0		0
BR129	9	2	0		0	0		0	0		0	0		0	0		0	0		0
BR130	10	2	0		0	0		0	0		0	0		0	0		0	0		0
BR131	10	2	0		0	0		0	0		0	0		0	0		0	0		0
BR132	7	2	0		0	0		0	0		0	0		0	0		0	0		0
BR133	14	1	0		0	0		0	0		0	0		0	0		0	0		0
BR134	5	1	0	0	0	0	0	0	0	0	0	0	0	0	0	0	0	0	0	0
BR135	5	1	0		0	0		0	0		0	0		0	0		0	0		0
BR136	8	2	0		0	0		0	0		0	0		0	0		0	0		0
BR137	10	1	0		0	0		0	0		0	0		0	0		0	0		0
BR138	10	2	0		0	0		0	0		0	0		0	0		0	0		0
BR139	7	2	0		0	0		0	0		0	0		0	0		0	0		0
BR140	10	2	0		0	0		0	0		0	0		0	0		0	0		0
BR141	8	2	0		0	0		0	0		0	0		0	0		0	0		0
BR142	8	2	0		0	0		0	0		0	0		0	0		0	0		0
BR143	8	1	0		0	0		0	8		8	0		0	0		0	0		0	0		0	0		0	0		0	0		0	0		0	0		0
BR144	8	1	0		0	0		0	0		0	0		0	0		0	0		0
BR145	6	2	0		0	0		0	0		0	0		0	0		0	0		0
BR146	9	1	0		0	0		0	0		0	0		0	0		0	0		0
BR147	13	2	0		0	0		0	0		0	0		0	0		0	0		0
BR148	8	2	0		0	0		0	0		0	0		0	0		0	0		0
BR149	12	2	0		0	0		0	0		0	0		0	0		0	0		0
BR150	7	2	0		0	0		0	0		0	0		0	0		0	0		0
BR151	6	2	0		0	0		0	0		0	0		0	0		0	0		0
BR152	8	1	0		0	0		0	2		2	0		0	0		0	0		0	0		0	0		0	0		0	0		0	0		0	0		0
BR153	7	1	0		0	0		0	0		0	0		0	0		0	0		0
BR154	13	1	0		0	0		0	0		0	0		0	0		0	0		0
BR155	6	1	0		0	0		0	0		0	0		0	0		0	0		0
BR156	9	1	0		0	0		0	0		0	0		0	0		0	0		0
BR157	14	1	0	0	0	0	0	0	0	0	0	0	0	0	0	0	0	0	0	0
BR158	12	1	0		0	0		0	0		0	0		0	0		0	0		0
BR159	11	2	0		0	0		0	0		0	0		0	0		0	0		0
BR160	11	1	0		0	0		0	0		0	0		0	0		0	0		0
BR161	8	2	0		0	0		0	0		0	0		0	0		0	0		0
BR162	12	2	0		0	0		0	0		0	0		0	0		0	0		0
BR163	8	2	0		0	0		0	0		0	0		0	0		0	0		0
BR164	8	2	0		0	0		0	0		0	0		0	0		0	0		0
BR165	6	1	0		0	0		0	0		0	0		0	0		0	0		0
BR166	11	1	0		0	0		0	0		0	0		0	0		0	0		0
BR167	7	1	0		0	0		0	0		0	0		0	0		0	0		0
BR168	8	2	0	0	0	0	0	0	0	0	0	0	0	0	0	0	0	0	0	0
BR169	9	2	0		0	0		0	0		0	0		0	0		0	0		0
BR170	9	2	0		0	0		0	0		0	0		0	0		0	0		0
BR171	9	2	0		0	0		0	0		0	0		0	0		0	0		0
BR172	10	2	0		0	0		0	0		0	0		0	0		0	0		0
BR173	10	2	0		0	0		0	0		0	0		0	0		0	0		0
BR174	11	1	0		0	0		0	0		0	0		0	0		0	0		0
BR175	10	1	0		0	0		0	2		2	0		0	0		0	1		1	0		0	0		0	0		0	0		0	0		0	0		0
BR176	14	1	0		0	0		0	0		0	0		0	0		0	0		0
BR177	10	2	0		0	0		0	0		0	0		0	0		0	0		0
BR178	12	2	0		0	0		0	0		0	0		0	0		0	0		0
BR179	11	2	0		0	0		0	0		0	0		0	0		0	0		0
BR180	14	2	0		0	0		0	0		0	0		0	0		0	0		0
BR181	11	1	0		0	0		0	0		0	0		0	0		0	0		0
BR182	13	2	0	0	0	0	0	0	0	0	0	0	0	0	0	0	0	0	0	0
BR183	10	1	0		0	0		0	0		0	0		0	0		0	0		0
BR184	14	1	0		0	0		0	0		0	0		0	0		0	0		0
BR185	6	2	0		0	0		0	0		0	0		0	0		0	0		0
BR186	14	1	0		0	0		0	0		0	0		0	0		0	0		0
BR187	13	1	0		0	0		0	0		0	0		0	0		0	0		0
BR188	7	1	0		0	0		0	0		0	0		0	0		0	0		0
BR189	11	1	0	0	0	0	0	0	0	0	0	0	0	0	0	0	0	0	0	0
BR190	13	1	0		0	0		0	0		0	0		0	0		0	0		0
BR191	9	1	0		0	0		0	0		0	0		0	0		0	0		0
BR192	9	1	0		0	0		0	0		0	0		0	0		0	0		0
BR193	11	1	0		0	0		0	1		1	0		0	0		0	2		2	0		0	0		0	0		0	0		0	0		0	0		0
BR194	12	2	0		0	0		0	0		0	0		0	0		0	0		0
BR195	14	1	0	0	0	0	0	0	0	0	0	0	0	0	0	0	0	0	0	0
BR196	13	2	0		0	0		0	0		0	0		0	0		0	0		0
BR197	6	2	0		0	0		0	0		0	0		0	0		0	0		0
BR198	11	2	0		0	0		0	0		0	0		0	0		0	0		0
BR199	14	1	0		0	0		0	0		0	0		0	0		0	0		0
BR200	12	2	0		0	0		0	0		0	0		0	0		0	0		0
BR201	6	2	0		0	0		0	0		0	0		0	0		0	0		0
BR202	6	2	0		0	0		0	0		0	0		0	0		0	0		0
BR203	9	1	0		0	0		0	0		0	0		0	0		0	0		0
BR204	12	2	0		0	0		0	0		0	0		0	0		0	0		0
BR205	8	1	0		0	0		0	0		0	0		0	0		0	0		0
BR206	10	1	0		0	0		0	0		0	0		0	0		0	0		0
BR207	7	1	0		0	0		0	0		0	0		0	0		0	0		0
BR208	11	1	2246		2246	0		0	5		5	2326		2326	0		0	7		7	0		0	0		0	4		4	0		0	0		0	1		1
BR209	7	2	3042		3042	0		0	19		19	2898		2898	0		0	9		9	0		0	0		0	10		10	0		0	0		0	4		4
BR210	9	2	509		509	0		0	44		44	502		502	0		0	18		18	0		0	0		0	29		29	0		0	0		0	24		24
BR211	12	1	0		0	0		0	0		0	0		0	0		0	0		0
BR212	8	2	0		0	0		0	0		0	0		0	0		0	0		0
BR213	11	1	0		0	0		0	0		0	0		0	0		0	0		0
BR214	5	2	0		0	0		0	0		0	0		0	0		0	0		0
BR215	5	2	0		0	0		0	0		0	0		0	0		0	0		0
BR216	9	2	0		0	0		0	0		0	0		0	0		0	0		0
BR217	7	1	79		79	0		0	0		0	95		95	0		0	0		0	0		0	0		0	0		0	0		0	0		0	0		0
BR218	12	1	0		0	0		0	0		0	0		0	0		0	0		0
BR219	12	1	0		0	0		0	0		0	0		0	0		0	0		0
BR220	13	1	0		0	0		0	4		4	0		0	0		0	12		12	0		0	0		0	0		0	0		0	0		0	0		0
BR221	7	1	0		0	0		0	0		0	0		0	0		0	0		0
BR222	7	1	0		0	0		0	0		0	0		0	0		0	0		0
BR223	11	1	0	0	0	0	0	0	0	0	0	0	0	0	0	0	0	0	0	0
BR224	5	1	0		0	0		0	0		0	0		0	0		0	0		0
BR225	9	2	0		0	0		0	0		0	0		0	0		0	0		0
BR226	5	1	0		0	0		0	0		0	0		0	0		0	0		0
BR227	10	2	0		0	0		0	0		0	0		0	0		0	0		0
BR228	14	1	0	0	0	0	0	0	0	0	0	0	0	0	0	0	0	0	0	0
BR229	12	2	0		0	0		0	0		0	0		0	0		0	0		0
BR230	7	2	0		0	0		0	0		0	0		0	0		0	0		0
BR231	7	2	0		0	0		0	0		0	0		0	0		0	0		0
BR232	9	1	0		0	0		0	0		0	0		0	0		0	0		0
BR233	5	2	0		0	0		0	0		0	0		0	0		0	0		0
BR234	8	1	0		0	0		0	0		0	0		0	0		0	0		0
BR235	14	1	0		0	0		0	0		0	0		0	0		0	0		0
BR236	11	2	0		0	0		0	0		0	0		0	0		0	0		0
BR237	9	1	0		0	0		0	0		0	0		0	0		0	0		0
BR238	9	1	0		0	0		0	0		0	0		0	0		0	0		0
BR239	14	1	0		0	0		0	0		0	0		0	0		0	0		0
BR240	7	1	0		0	0		0	0		0	0		0	0		0	0		0
BR241	5	2	0		0	0		0	0		0	0		0	0		0	0		0
BR242	9	1	0		0	0		0	0		0	0		0	0		0	0		0
BR243	12	1	0		0	0		0	0		0	0		0	0		0	0		0
BR244	14	2	0		0	0		0	0		0	0		0	0		0	0		0
BR245	5	1	0		0	0		0	0		0	0		0	0		0	0		0
BR246	14	2	0		0	0		0	0		0	0		0	0		0	0		0
			246	21	246	246	21	246	246	21	246	246	21	246	246	21	246	246	21	246	39	0	39	39	0	39	39	0	39	39	0	39	39	0	39	39	0	39
			39025		39200	0		0	150		150	38489		38959	0		0	126		126	0		0	0		0	43		43	0		0	0		0	31		31
			77514		78159	0		0	276		276										0		0	0		0	74		74
		WHO		3			0			0			4			0			0
		SWISS		1			0			0			1			0			0

## Sheet: BRA_ERR
KatoKatz	BL_AS	FU_AS	BL_TT	FU_TT	BL_HW	FU_HW		BL_AS	FU_AS	BL_TT	FU_TT	BL_HW	FU_HW
	6766	0			62	53		6816	0			62	53
	6816	0			40	0		6766	0			40	0
	6016	0			28	14		6016	0			28	14
	5940	0			25	0		5940	0			25	0
	4572	0			17	0		4930	0			17	0
	4930	0			16	0		4572	0			16	0
	4362	0			14	0		4362	0			14	0
	3789	0			12	5		3789	0			12	5
	3472	0			10	0		3694	0			10	0
	3694	0			10	0		3510	0			10	0
	3510	0			10	2		3472	0			10	2
	2058	0			8	0		2832	0			8	0
	2188	0			6	0		2188	0			6	0
	2362	0			5	0		2058	0			5	0
	1479	0			5	0		1479	0			5	0
	609	0			3	0		1012	0			3	0
	1011	0			3	0		1011	0			3	0
	1012	0			2	0		1011	0			2	0
	672	0						672	0
	664	0						664	0
	836	0						609	0
	251	0						251	0
	192	0						192	0
	174	0						174	0
	89	0						89	0
	40	0						40	0
	12	0						12	0
	6	0						6	0
	28	0	0	0	18	4		28	0	0	0	18	4
	2411.5	0	0	0	15.3333	4.11111		2434.54	0	0	0	15.3333	4.11111
	100		0		73.1884			100		0		73.1884

## Sheet: ETH
SubjectID	Age	Sex	BL_KKA_AL	BL_KKA_AL_QC	BL_KKA_AL_postQC	BL_KKA_TT	BL_KKA_TT_QC	BL_KKA_TT_postQC	BL_KKA_HW	BL_KKA_HW_QC	BL_KKA_HW_postQC	BL_KKB_AL	BL_KKB_AL_QC	BL_KKB_AL_PostQC	BL_KKB_TT	BL_KKB_TT_QC	BL_KKB_TT_postQC	BL_KKB_HW	BL_KKB_HW_QC	BL_KKB_HW_postQC	FU_KKA_AL	FU_KKA_AL_QC	FU_KKA_AL_postQC	FU_KKA_TT	FU_KKA_TT_QC	FU_KKA_TT_postQC	FU_KKA_HW	FU_KKA_HW_QC	FU_KKA_HW_postQC	FU_KKB_AL	FU_KKB_AL_QC	FU_KKB_AL_PostQC	FU_KKB_TT	FU_KKB_TT_QC	FU_KKB_TT_postQC	FU_KKB_HW	FU_KKB_HW_QC	FU_KKB_HW_postQC
ET001	10	1	158		158	2		2	0		0	138		138	2		2	0		0	0		0	1		1	0		0	0		0	1		1	0		0
ET002	9	1	13		13	0		0	0		0	10		10	0		0	0		0
ET003	10	1	0		0	0		0	0		0	0		0	0		0	0		0
ET004	10	1	0		0	1		1	0		0	0		0	2		2	0		0
ET005	11	1	0	0	0	0	0	0	0	0	0	0	0	0	2	11	2	0	0	0	0		0	2		2	0		0	0		0	1		1	0		0
ET006	13	2	923		923	9		9	0		0	969		969	12		12	0		0	0		0	12		12	0		0	0		0	9		9	0		0
ET007	10	2	2540	2910	2540	20	26	20	0	0	0	2482	2611	2482	8	12	8	0	0	0	0		0	0		0	0		0	0		0	0		0	0		0
ET008	11	1	590		590	12		12	0		0	639		639	13		13	0		0	0		0	2		2	0		0	0		0	1		1	0		0
ET009	7	1	0		0	0		0	0		0	0		0	0		0	0		0
ET010	10	2	0		0	0		0	0		0	0		0	0		0	0		0
ET011	8	2	0		0	0		0	0		0	0		0	0		0	0		0
ET012	10	2	0		0	0		0	0		0	0		0	0		0	0		0
ET013	9	2	1104	1377	1377	0	0	0	0	0	0	991	1490	1490	0	0	0	0	0	0
ET014	10	2	6		6	0		0	0		0	7		7	0		0	0		0	0		0	0		0	0		0	0		0	0		0	0		0
ET015	13	1	31		31	0		0	0		0	47		47	0		0	0		0	0		0	0		0	0		0	0		0	0		0	0		0
ET016	12	1	0		0	5		5	88		88	0		0	1		1	48		48	0		0	0		0	5		5	0		0	0		0	2		2
ET017	13	1	0		0	11		11	0		0	0		0	5		5	0		0	0		0	3		3	0		0	0		0	4		4	0		0
ET018	12	1	0		0	1		1	0		0	0		0	9		9	0		0	0		0	0		0	0		0	0		0	1		1	0		0
ET019	12	1	0	0	0	0	0	0	2	1	2	0	0	0	0	0	0	1	1	1	0	0	0	0	0	0	0	0	0	0	0	0	0	0	0	0	0	0
ET020	11	1	276		276	46		46	0		0	195		195	20		20	0		0	0		0	14		14	0		0	0		0	14		14	0		0
ET021	9	2	38		38	0		0	0		0	79		79	0		0	0		0	0		0	0		0	0		0	0		0	0		0	0		0
ET022	9	2	0		0	0		0	0		0	0		0	0		0	0		0
ET023	10	2	0		0	0		0	0		0	0		0	0		0	0		0
ET024	13	2	0		0	2		2	24		24	0		0	1		1	19		19	0		0	3		3	0		0	0		0	1		1	0		0
ET025	13	2	0		0	0		0	0		0	0		0	0		0	0		0
ET026	12	2	0		0	1		1	0		0	1		1	3		3	0		0	0		0	0		0	0		0	0		0	0		0	0		0
ET027	9	1	0		0	0		0	0		0	0		0	0		0	0		0
ET028	10	1	12		12	0		0	0		0	23		23	0		0	0		0
ET029	11	1	0		0	3		3	0		0	0		0	4		4	0		0
ET030	11	2	0		0	0		0	0		0	0		0	0		0	0		0	0		0	2		2	0		0	0		0	0		0	0		0
ET031	10	2	0		0	2		2	0		0	0		0	4		4	0		0	0		0	1		1	0		0	0		0	0		0	0		0
ET032	10	1	0		0	0		0	0		0	0		0	0		0	0		0
ET033	11	2	0		0	4		4	0		0	0		0	8		8	0		0	0		0	12		12	0		0	0		0	9		9	0		0
ET034	11	2	0	0	0	0	0	0	0	0	0	0	0	0	0	0	0	0	0	0
ET035	11	2	0		0	0		0	0		0	0		0	0		0	0		0
ET036	9	2	0		0	0		0	0		0	0		0	0		0	0		0	0		0	0		0	0		0	0		0	0		0	0		0
ET037	11	1	260		260	0		0	0		0	191		191	0		0	0		0	0		0	0		0	0		0	0		0	0		0	0		0
ET038	11	1	0	0	0	0	0	0	0	0	0	0	0	0	0	0	0	0	0	0
ET039	8	1	0		0	0		0	0		0	0		0	0		0	0		0
ET040	12	1	0		0	0		0	0		0	0		0	0		0	0		0
ET041	9	1	0		0	0		0	0		0	0		0	0		0	0		0
ET042	11	1	0		0	0		0	0		0	0		0	0		0	0		0
ET043	9	2	0		0	0		0	0		0	0		0	0		0	0		0
ET044	9	2	0		0	0		0	0		0	0		0	0		0	0		0
ET045	9	2	0		0	0		0	0		0	0		0	0		0	0		0
ET046	13	2	0		0	2		2	0		0	0		0	1		1	0		0
ET047	14	2	0		0	0		0	0		0	0		0	0		0	0		0
ET048	14	2	0		0	5		5	0		0	0		0	3		3	0		0	0	0	0	1	1	1	0	0	0	0	0	0	0	0	0	0	0	0
ET049	13	2	0		0	7		7	1		1	0		0	16		16	1		1	0		0	2		2	0		0	0		0	1		1	0		0
ET050	13	2	0		0	0		0	17		17	0		0	0		0	7		7	0		0	0		0	0		0	0		0	0		0	0		0
ET051	14	1	50		50	0		0	20		20	25		25	0		0	10		10	0		0	0		0	0		0	0		0	0		0	0		0
ET052	12	1	0		0	0		0	0		0	0		0	0		0	0		0	0		0	0		0	0		0	0		0	0		0	0		0
ET053	10	2	0		0	0		0	0		0	0		0	0		0	0		0
ET054	9	2	0	0	0	5	7	5	0	0	0	0	0	0	10	8	10	0	0	0	0	0	0	1	1	1	0	0	0	0	0	0	1	1	1	0	0	0
ET055	10	2	614		614	7		7	0		0	729		729	5		5	0		0	0		0	9		9	0		0	0		0	7		7	0		0
ET056	9	2	0		0	0		0	0		0	0		0	0		0	0		0
ET057	10	2	16		16	0		0	0		0	17		17	0		0	0		0	0		0	0		0	0		0	0		0	0		0	0		0
ET058	8	2	0		0	2		2	0		0	0		0	4		4	0		0
ET059	11	2	5	15	5	0	0	0	0	0	0	9	11	9	0	0	0	1	0	0	0	0	0	0	0	0	0	0	0	0	0	0	0	0	0	0	0	0
ET060	12	2	0		0	0		0	0		0	0		0	0		0	0		0
ET061	14	2	9		9	1		1	0		0	6		6	3		3	0		0	0		0	0		0	0		0	0		0	0		0	0		0
ET062	12	1	368		368	7		7	0		0	371		371	8		8	0		0	0		0	0		0	0		0	0		0	1		1	0		0
ET063	12	1	0		0	4		4	0		0	0		0	2		2	0		0	0		0	1		1	0		0	0		0	2		2	0		0
ET064	10	1	15	9	15	0	0	0	0	0	0	16	9	16	0	0	0	0	0	0	0	0	0	0	0	0	0	0	0	0	0	0	0	0	0	0	0	0
ET065	11	1	0		0	0		0	0		0	0		0	0		0	0		0
ET066	10	1	6		6	0		0	0		0	7		7	0		0	0		0	0		0	1		1	0		0	0		0	0		0	0		0
ET067	12	1	268		268	0		0	0		0	341		341	0		0	0		0	0		0	0		0	0		0	0		0	0		0	0		0
ET068	8	1	0		0	0		0	0		0	0		0	0		0	0		0
ET069	9	1	4		4	2		2	9		9	4		4	1		1	9		9	0		0	0		0	0		0	0		0	0		0	0		0
ET070	7	2	0		0	0		0	2		2	1		1	0		0	0		0	0		0	0		0	0		0	0		0	0		0	0		0
ET071	9	1	0		0	0		0	0		0	0		0	0		0	0		0	0		0	0		0	0		0	0		0	0		0	0		0
ET072	8	2	0		0	0		0	0		0	0		0	0		0	0		0
ET073	6	1	0		0	5		5	16		16	0		0	4		4	8		8	0		0	0		0	0		0	0		0	0		0	0		0
ET074	7	1	0		0	0		0	0		0	0		0	0		0	0		0
ET075	13	1	0		0	2		2	8		8	0		0	3		3	14		14
ET076	9	1	0	0	0	0	0	0	3	3	3	0	2	0	2	0	0	2	3	2	0	0	0	0	0	0	0	0	0	0	0	0	0	0	0	0	0	0
ET077	8	2	8		8	0		0	0		0	5		5	1		1	0		0	0		0	0		0	0		0	0		0	0		0	0		0
ET078	11	2	0		0	0		0	0		0	0		0	0		0	0		0	0		0	4		4	0		0	0		0	2		2	0		0
ET079	11	2	0	0	0	0	0	0	1	1	1	0	0	0	0	0	0	1	1	1	0	0	0	0	0	0	0	0	0	0	0	0	0	0	0	0	0	0
ET080	8	2	0		0	0		0	0		0	0		0	0		0	0		0
ET081	8	2	0		0	0		0	4		4	0		0	0		0	0		0	0		0	0		0	0		0	0		0	0		0	0		0
ET082	10	2	0		0	0		0	0		0	0		0	0		0	0		0
ET083	9	2	4		4	3		3	0		0	6		6	0		0	0		0
ET084	7	2	0		0	0		0	0		0	0		0	0		0	0		0
ET085	7	2	197		197	0		0	0		0	232		232	0		0	0		0	0		0	0		0	0		0	0		0	0		0	0		0
ET086	7	2	38		38	2		2	0		0	45		45	2		2	1		1	0		0	0		0	0		0	0		0	0		0	0		0
ET087	12	2	0		0	0		0	0		0	0		0	0		0	0		0
ET088	7	2	0	0	0	0	0	0	0	0	0	1	0	1	0	0	0	0	0	0
ET089	11	2	0		0	0		0	0		0	0		0	0		0	0		0
ET090	9	2	0		0	0		0	0		0	0		0	0		0	0		0
ET091	10	2	0		0	6		6	0		0	0		0	4		4	0		0
ET092	8	1	0		0	0		0	2		2	0		0	0		0	4		4	0		0	0		0	0		0	0		0	0		0	2		2
ET093	10	2	0	0	0	0	0	0	0	0	0	0	0	0	0	0	0	2	2	2
ET094	9	1	0	0	0	0	0	0	10	10	10	0	0	0	0	0	0	6	10	6	0	0	0	0	0	0	1	1	1	0	0	0	0	0	0	1	1	1
ET095	10	1	0	0	0	0	0	0	0	0	0	0	0	0	0	0	0	0	0	0
ET096	11	2	0		0	0		0	0		0	0		0	0		0	0		0
ET097	9	1	0		0	1		1	0		0	0		0	0		0	0		0
ET098	8	1	0		0	0		0	0		0	0		0	0		0	0		0
ET099	11	1	0		0	0		0	0		0	0		0	0		0	0		0
ET100	10	1	82		82	2		2	0		0	72		72	3		3	0		0	0		0	0		0	0		0	0		0	0		0	0		0
ET101	10	1	0		0	2		2	0		0	0		0	5		5	0		0	0		0	4		4	0		0	0		0	2		2	0		0
ET102	8	1	0		0	0		0	0		0	0		0	0		0	0		0
ET103	7	1	977		977	0		0	15		15	854		854	0		0	10		10	0		0	0		0	0		0	0		0	0		0	0		0
ET104	10	2	0		0	10		10	1		1	0		0	23		23	3		3	0		0	0		0	0		0	0		0	0		0	0		0
ET105	8	1	0		0	0		0	0		0	0		0	0		0	0		0
ET106	11	2	37	37	37	19	19	19	0	1	1	46	46	46	16	16	16	2	2	2	0		0	0		0	0		0	0		0	0		0	0		0
ET107	9	1	0	0	0	5	2	5	0	0	0	0	0	0	0	4	4	0	0	0	0	1	0	1	1	1	0	0	0	0	0	0	0	0	0	0	0	0
ET108	8	2	0		0	0		0	0		0	0		0	0		0	0		0
ET109	7	2	0		0	0		0	0		0	0		0	0		0	0		0
ET110	8	2	0		0	0		0	27		27	0		0	0		0	17		17
ET111	8	2	425		425	0		0	0		0	432		432	0		0	0		0	0		0	3		3	0		0	0		0	2		2	0		0
ET112	10	1	0		0	0		0	3		3	0		0	0		0	5		5
ET113	10	2	17		17	28		28	0		0	22		22	14		14	0		0	0		0	8		8	0		0	0		0	6		6	0		0
ET114	8	2	0		0	4		4	8		8	0		0	0		0	2		2	0		0	26		26	3		3	0		0	19		19	3		3
ET115	11	2	0		0	0		0	0		0	0		0	0		0	0		0
ET116	11	2	46		46	3		3	0		0	44		44	7		7	0		0	2		2	3		3	0		0	3		3	5		5	0		0
ET117	7	1	0		0	0		0	0		0	0		0	0		0	0		0
ET118	7	1	0		0	0		0	0		0	0		0	0		0	0		0
ET119	7	1	0		0	0		0	0		0	0		0	0		0	0		0
ET120	6	1	0		0	0		0	0		0	0		0	0		0	0		0
ET121	10	1	0		0	0		0	0		0	0		0	0		0	0		0
ET122	8	1	0		0	0		0	0		0	0		0	0		0	0		0
ET123	9	1	0		0	0		0	0		0	0		0	0		0	0		0
ET124	10	1	0		0	0		0	0		0	0		0	0		0	0		0
ET125	7	1	0		0	0		0	10		10	0		0	0		0	22		22
ET126	7	1	0		0	5		5	0		0	0		0	9		9	0		0	0		0	7		7	0		0	0		0	1		1	0		0
ET127	9	2	359		359	5		5	0		0	366		366	10		10	0		0	0		0	0		0	0		0	0		0	0		0	0		0
ET128	12	2	0		0	0		0	0		0	0		0	0		0	0		0
ET129	7	2	0		0	0		0	0		0	0		0	0		0	0		0
ET130	9	1	12		12	3		3	0		0	11		11	2		2	0		0	26		26	3		3	0		0	24		24	5		5	0		0
ET131	11	1	26		26	0		0	3		3	34		34	1		1	2		2	0		0	0		0	0		0	0		0	0		0	0		0
ET132	10	1	0	4	4	0	0	0	2	2	2	12	5	12	0	0	0	1	1	1	0		0	0		0	0		0	0		0	0		0	0		0
ET133	8	2	0		0	0		0	0		0	0		0	0		0	0		0
ET134	10	1	2320	2354	2320	9	15	9	0	0	0	2292	2315	2292	6	11	6	0	0	0	0	0	0	1	0	1	0	0	0	0	0	0	2	0	2	0	0	0
ET135	8	1	75		75	7		7	1		1	68		68	8		8	3		3	0	0	0	0	2	2	0	0	0	0	0	0	6	6	6	0	0	0
ET136	5	1	0		0	0		0	0		0	0		0	1		1	0		0	0		0	0		0	0		0	0		0	0		0	0		0
ET137	7	2	65		65	0		0	0		0	58		58	0		0	0		0	0		0	0		0	0		0	0		0	0		0	0		0
ET138	7	1	532		532	0		0	0		0	846		846	0		0	0		0	0		0	0		0	0		0	0		0	0		0	0		0
ET139	7	1	21		21	0		0	0		0	14		14	0		0	0		0	0		0	0		0	0		0	0		0	0		0	0		0
ET140	7	1	75		75	58		58	0		0	32		32	28		28	0		0	0		0	31		31	0		0	0		0	35		35	0		0
ET141	9	2	0		0	0		0	0		0	0		0	0		0	0		0
ET142	9	2	0		0	0		0	0		0	0		0	0		0	0		0
ET143	8	2	257	465	465	3	3	3	1	1	1	85	577	577	5	5	5	0	2	2	6		6	2		2	0		0	3		3	0		0	0		0
ET144	10	2	0		0	0		0	0		0	0		0	0		0	0		0
ET145	8	2	86		86	0		0	9		9	84		84	0		0	4		4	0		0	0		0	0		0	0		0	0		0	0		0
ET146	7	2	116		116	2		2	0		0	134		134	6		6	0		0	0	0	0	0	4	4	0	0	0	0	0	0	4	4	4	0	0	0
ET147	10	2	0		0	0		0	0		0	0		0	0		0	0		0
ET148	8	2	1		1	0		0	0		0	1		1	0		0	0		0	0		0	0		0	0		0	0		0	0		0	0		0
ET149	9	1	0	0	0	0	3	3	0	0	0	0	0	0	4	4	4	0	0	0
ET150	9	1	578		578	0		0	0		0	656		656	0		0	0		0	0		0	0		0	1		1	0		0	0		0	1		1
ET151	10	1	169	244	244	1	1	1	9	14	9	329	329	329	1	1	1	13	13	13	0		0	0		0	3		3	0		0	0		0	1		1
ET152	8	1	0		0	29		29	0		0	0		0	35		35	0		0
ET153	8	1	58	58	58	0	1	1	2	2	2	66	66	66	1	1	1	2	2	2	0		0	0		0	0		0	0		0	0		0	0		0
ET154	9	2	35	35	35	0	0	0	0	0	0	0	23	23	0	0	0	0	0	0	0		0	0		0	0		0	0		0	0		0	0		0
ET155	8	1	66		66	0		0	1		1	59		59	0		0	1		1	0		0	0		0	2		2	0		0	0		0	2		2
ET156	7	2	0		0	0		0	5		5	0		0	0		0	6		6	0		0	0		0	0		0	0		0	0		0	0		0
ET157	9	2	0	0	0	0	0	0	0	0	0	0	0	0	0	0	0	0	0	0	0	0	0	0	0	0	0	0	0	0	0	0	0	0	0	0	0	0
ET158	8	2	453		453	0		0	0		0	429		429	0		0	0		0	0		0	0		0	0		0	0		0	0		0	0		0
ET159	13	2	215		215	4		4	3		3	211		211	6		6	1		1	0		0	0		0	0		0	0		0	0		0	0		0
ET160	13	2	130		130	3		3	0		0	141		141	3		3	0		0	0		0	0		0	0		0	0		0	0		0	0		0
ET161	13	2	69		69	2		2	0		0	124		124	2		2	0		0	0		0	0		0	0		0	0		0	0		0	0		0
ET162	9	2	0		0	0		0	0		0	0		0	0		0	0		0	0	0	0	0	2	2	0	0	0	0	0	0	3	3	3	0	0	0
ET163	10	1	0		0	0		0	3		3	0		0	0		0	6		6	0		0	0		0	0		0	0		0	0		0	0		0
ET164	12	2	24		24	0		0	4		4	20		20	0		0	2		2	0		0	0		0	2		2	0		0	0		0	2		2
ET165	8	2	0		0	0		0	0		0	0		0	0		0	0		0
ET166	10	2	0		0	0		0	4		4	0		0	0		0	4		4	0		0	0		0	0		0	0		0	0		0	0		0
ET167	9	2	16		16	1		1	0		0	12		12	0		0	0		0	0		0	0		0	0		0	0		0	0		0	0		0
ET168	10	1	39	24	24	0	0	0	6	15	6	32	29	32	0	0	0	15	30	30	0	0	0	0	0	0	0	0	0	0	0	0	0	0	0	2	0	0
ET169	12	1	189		189	5		5	6		6	178		178	5		5	2		2	0		0	0		0	0		0	0		0	0		0	0		0
ET170	8	2	0		0	0		0	0		0	0		0	0		0	0		0
ET171	8	2	0		0	0		0	0		0	0		0	0		0	0		0
ET172	8	2	0		0	0		0	0		0	0		0	0		0	0		0
ET173	10	1	19		19	5		5	0		0	23		23	4		4	0		0
ET174	8	1	0		0	1		1	0		0	0		0	3		3	0		0	0		0	1		1	0		0	0		0	2		2	0		0
ET175	9	2	0		0	0		0	0		0	0		0	0		0	0		0	0	0	0	0	0	0	0	0	0	0	0	0	0	0	0	2	2	2
ET176	11	1	0		0	3		3	0		0	0		0	4		4	0		0	0		0	0		0	0		0	0		0	0		0	0		0
ET177	8	2	0		0	12		12	3		3	0		0	16		16	3		3	0		0	6		6	0		0	0		0	9		9	0		0
ET178	7	1	0		0	0		0	0		0	0		0	0		0	0		0	0		0	0		0	0		0	0		0	0		0	0		0
ET179	9	1	0		0	0		0	0		0	0		0	0		0	0		0
ET180	10	2	0		0	0		0	0		0	0		0	0		0	0		0
ET181	10	2	0		0	0		0	0		0	0		0	0		0	0		0
ET182	10	2	392	372	392	0	0	0	0	0	0	416	394	416	0	0	0	0	0	0	0	0	0	0	0	0	0	0	0	0	0	0	0	0	0	0	0	0
ET183	9	2	0		0	4		4	0		0	0		0	1		1	0		0	0		0	1		1	0		0	0		0	2		2	0		0
ET184	9	1	0		0	0		0	0		0	0		0	0		0	0		0
ET185	8	1	0		0	0		0	0		0	0		0	0		0	0		0
ET186	7	2	0		0	0		0	0		0	0		0	0		0	0		0
ET187	7	2	0		0	5		5	0		0	0		0	3		3	0		0	0		0	8		8	0		0	0		0	11		11	0		0
ET188	7	2	89		89	3		3	0		0	100		100	1		1	0		0	0		0	3		3	0		0	0		0	4		4	0		0
ET189	9	2	1496	1596	1496	31	24	31	0	0	0	1650	1548	1650	17	20	17	0	0	0
ET190	12	1	321		321	9		9	0		0	305		305	9		9	0		0	0		0	5		5	0		0	0		0	6		6	0		0
ET191	8	1	3		3	1		1	0		0	2		2	0		0	0		0	0		0	0		0	0		0	0		0	0		0	0		0
ET192	8	2	416		416	10		10	0		0	621		621	5		5	0		0	0		0	0		0	0		0	0		0	0		0	0		0
ET193	7	2	172		172	0		0	0		0	142		142	0		0	0		0
ET194	6	1	370		370	2		2	0		0	472		472	5		5	0		0	0		0	11		11	1		1	0		0	7		7	2		2
ET195	7	1	27	29	27	0	0	0	0	0	0	23	26	23	0	0	0	0	0	0
ET196	8	1	59		59	0		0	0		0	38		38	0		0	0		0	0		0	4		4	0		0	0		0	3		3	0		0
ET197	9	1	0		0	0		0	23		23	0		0	0		0	30		30	0		0	0		0	1		1	0		0	0		0	0		0
ET198	6	1	2		2	0		0	0		0	3		3	0		0	0		0
ET199	8	2	0		0	0		0	0		0	0		0	0		0	0		0	0		0	3		3	0		0	0		0	3		3	0		0
ET200	7	2	107		107	13		13	0		0	94		94	9		9	0		0
ET201	8	2	1285		1285	16		16	0		0	1124		1124	11		11	0		0	0		0	2		2	0		0	0		0	3		3	0		0
ET202	6	2	0		0	0		0	0		0	0		0	0		0	0		0
ET203	8	2	0		0	0		0	0		0	0		0	0		0	0		0
ET204	8	1	10		10	0		0	0		0	7		7	0		0	0		0	0		0	0		0	0		0	0		0	0		0	0		0
ET205	8	2	0		0	0		0	0		0	0		0	0		0	0		0
ET206	8	2	0	0	0	0	0	0	65	47	47	0	0	0	0	0	0	38	38	38	0		0	0		0	0		0	0		0	0		0	0		0
ET207	8	2	0		0	0		0	0		0	0		0	0		0	0		0
ET208	6	2	390		390	7		7	18		18	298		298	5		5	11		11	0		0	2		2	0		0	0		0	2		2	0		0
ET209	7	1	0		0	0		0	0		0	0		0	0		0	0		0
ET210	8	1	0		0	0		0	16		16	0		0	0		0	14		14	0		0	0		0	1		1	0		0	0		0	1		1
ET211	6	2	0		0	0		0	0		0	0		0	0		0	0		0	0		0	0		0	0		0	0		0	0		0	0		0
ET212	8	1	610	1191	1191	7	13	7	0	0	0	1059	1059	1059	14	14	14	0	0	0	0		0	6		6	0		0	0		0	4		4	0		0
ET213	6	2	59	95	95	0	0	0	0	0	0	110	110	110	0	0	0	0	0	0	0		0	0		0	0		0	0		0	0		0	0		0
ET214	6	2	131		131	1		1	1		1	138		138	2		2	2		2	0		0	3		3	0		0	0		0	2		2	0		0
ET215	7	1	200		200	0		0	0		0	253		253	0		0	0		0	0		0	0		0	0		0	0		0	0		0	0		0
ET216	7	1	0		0	0		0	0		0	0		0	0		0	0		0
ET217	8	1	0		0	1		1	0		0	0		0	0		0	0		0	0		0	0		0	0		0	0		0	0		0	0		0
ET218	8	1	0		0	9		9	0		0	0		0	15		15	0		0	0		0	0		0	0		0	0		0	0		0	0		0
ET219	9	1	0		0	0		0	8		8	0		0	0		0	10		10	0		0	0		0	0		0	0		0	0		0	0		0
ET220	10	1	0		0	2		2	0		0	0		0	2		2	0		0
ET221	8	2	19		19	0		0	0		0	16		16	0		0	0		0	0		0	0		0	0		0	0		0	0		0	0		0
ET222	9	2	0		0	0		0	0		0	0		0	0		0	0		0
ET223	7	2	0	0	0	0	0	0	0	0	0	0	0	0	0	0	0	0	0	0
ET224	8	2	0		0	0		0	0		0	0		0	0		0	0		0
ET225	9	2	0		0	0		0	0		0	0		0	0		0	0		0
ET226	8	2	478		478	0		0	0		0	353		353	0		0	0		0	0		0	0		0	0		0	0		0	0		0	0		0
ET227	8	2	2248		2248	4		4	0		0	3460		3460	8		8	0		0	0		0	0		0	0		0	0		0	0		0	0		0
ET228	8	1	7		7	1		1	0		0	7		7	0		0	0		0	0		0	0		0	0		0	0		0	1		1	0		0
ET229	8	1	187		187	0		0	0		0	194		194	0		0	0		0	0		0	0		0	0		0	0		0	0		0	0		0
ET230	11	2	0		0	4		4	9		9	0		0	2		2	12		12	0		0	0		0	0		0	0		0	0		0	0		0
ET231	5	1	0		0	0		0	6		6	0		0	0		0	3		3
ET232	9	2	64		64	0		0	0		0	63		63	0		0	0		0	0		0	0		0	0		0	0		0	0		0	0		0
ET233	9	2	8		8	0		0	0		0	10		10	0		0	0		0	0		0	0		0	0		0	0		0	0		0	0		0
ET234	8	2	0		0	0		0	0		0	0		0	0		0	0		0
ET235	8	2	377		377	0		0	0		0	371		371	0		0	0		0	0		0	0		0	0		0	0		0	0		0	0		0
ET236	7	1	0		0	0		0	0		0	0		0	0		0	0		0
ET237	10	2	0		0	2		2	0		0	0		0	5		5	0		0
ET238	8	2	0		0	9		9	0		0	0		0	3		3	0		0	0		0	2		2	0		0	0		0	2		2	0		0
ET239	7	1	283		283	0		0	0		0	275		275	0		0	0		0
ET240	8	2	65		65	0		0	0		0	73		73	0		0	0		0	0		0	0		0	0		0	0		0	0		0	0		0
ET241	8	1	4		4	0		0	0		0	6		6	0		0	0		0
ET242	9	1	92		92	0		0	1		1	80		80	0		0	3		3
ET243	9	1	761		761	0		0	0		0	821		821	0		0	0		0
ET244	9	1	0		0	0		0	0		0	0		0	0		0	0		0
ET245	8	1	0		0	0		0	0		0	0		0	0		0	0		0
ET246	8	1	3		3	0		0	0		0	4		4	0		0	0		0
ET247	7	1	0		0	0		0	0		0	0		0	0		0	0		0
ET248	8	1	0		0	0		0	0		0	0		0	0		0	0		0
ET249	9	1	0		0	0		0	0		0	0		0	0		0	0		0
ET250	8	1	2		2	0		0	0		0	2		2	0		0	0		0
ET251	9	2	0		0	0		0	0		0	0		0	0		0	0		0
ET252	9	1	43		43	0		0	0		0	15		15	0		0	0		0
ET253	6	1	0		0	0		0	0		0	0		0	0		0	0		0
ET254	7	1	0		0	0		0	0		0	0		0	0		0	0		0
ET255	9	1	0		0	0		0	0		0	0		0	0		0	0		0
ET256	8	1	0		0	0		0	3		3	0		0	0		0	9		9
ET257	8	1	0		0	0		0	0		0	0		0	0		0	0		0
ET258	8	1	0		0	1		1	0		0	0		0	0		0	0		0
ET259	7	2	26	30	26	1	2	1	0	0	0	12	20	12	2	4	2	0	0	0
ET260	8	2	0		0	0		0	0		0	0		0	0		0	0		0
ET261	12	1	63	63	63	2	2	2	0	0	0	34	55	55	0	1	1	0	0	0	0		0	4		4	0		0	0		0	2		2	0		0
ET262	10	1	32	55	55	0	0	0	8	12	8	52	52	52	0	0	0	8	8	8	0		0	0		0	0		0	0		0	0		0	0		0
ET263	8	1	0		0	0		0	0		0	0		0	0		0	0		0
ET264	9	1	101		101	1		1	1		1	88		88	2		2	3		3	0		0	1		1	0		0	0		0	3		3	0		0
ET265	9	1	0		0	0		0	0		0	0		0	0		0	0		0
ET266	9	1	149	363	363	5	5	5	0	3	3	429	435	429	6	6	6	8	8	8	0		0	3		3	2		2	0		0	3		3	4		4
ET267	8	1	209		209	0		0	0		0	182		182	0		0	0		0
ET268	9	1	2451		2451	0		0	0		0	2038		2038	0		0	0		0	0		0	0		0	0		0	0		0	0		0	0		0
ET269	9	1	25		25	0		0	0		0	35		35	0		0	0		0	0		0	0		0	0		0	0		0	0		0	0		0
ET270	11	1	0	0	0	0	0	0	0	0	0	0	0	0	0	0	0	0	0	0
ET271	9	2	0		0	0		0	0		0	0		0	0		0	0		0
ET272	10	1	244		244	3		3	7		7	291		291	4		4	12		12	0		0	0		0	0		0	0		0	2		2	0		0
ET273	9	2	2918		2918	2		2	5		5	2284		2284	5		5	8		8	0		0	0		0	0		0	0		0	0		0	0		0
ET274	9	2	0		0	0		0	0		0	0		0	0		0	0		0
ET275	9	1	0		0	0		0	0		0	0		0	0		0	0		0
ET276	5	1	0		0	0		0	0		0	0		0	0		0	0		0
ET277	10	1	0		0	0		0	0		0	0		0	0		0	0		0
ET278	9	1	0		0	0		0	0		0	0		0	0		0	0		0
ET279	9	1	2245		2245	48		48	2		2	2335		2335	28		28	3		3	0		0	0		0	0		0	0		0	0		0	0		0
ET280	8	2	204		204	0		0	0		0	193		193	0		0	0		0	0		0	0		0	0		0	0		0	0		0	0		0
ET281	8	2	47		47	4		4	0		0	42		42	2		2	0		0
ET282	9	2	0		0	0		0	0		0	0		0	0		0	0		0
ET283	10	2	0		0	4		4	0		0	0		0	9		9	0		0	0		0	1		1	0		0	0		0	1		1	0		0
ET284	8	2	3		3	0		0	0		0	2		2	0		0	0		0	0		0	0		0	0		0	0		0	0		0	0		0
ET285	9	2	21	34	34	0	0	0	0	0	0	49	37	37	0	0	0	0	0	0	0	0	0	0	0	0	0	0	0	0	0	0	0	0	0	0	0	0
ET286	9	2	28		28	0		0	0		0	34		34	0		0	0		0
ET287	8	2	0		0	5		5	0		0	0		0	3		3	0		0	0		0	0		0	0		0	0		0	0		0	0		0
ET288	10	1	0		0	12		12	0		0	0		0	8		8	0		0
ET289	11	1	0		0	1		1	0		0	0		0	1		1	0		0	0		0	6		6	0		0	0		0	5		5	0		0
ET290	13	1	0		0	0		0	0		0	0		0	0		0	0		0
ET291	11	1	11		11	0		0	0		0	147		147	2		2	0		0
ET292	12	1	32	23	32	0	0	0	0	0	0	19	20	19	0	0	0	0	0	0	0	0	0	60	56	60	0	0	0	0	0	0	53	63	53	0	0	0
ET293	11	1	0		0	2		2	8		8	0		0	1		1	3		3	0		0	2		2	0		0	0		0	2		2	0		0
ET294	13	2	71		71	0		0	0		0	65		65	0		0	0		0
ET295	13	2	0	0	0	1	1	1	9	9	9	0	0	0	0	0	0	11	11	11	0		0	1		1	0		0	0		0	1		1	1		1
ET296	9	1	920		920	0		0	0		0	1048		1048	0		0	0		0
ET297	10	1	0		0	0		0	0		0	0		0	0		0	0		0
ET298	9	1	0	0	0	5	5	5	48	36	36	0	0	0	2	2	2	19	26	19	0		0	1		1	6		6	0		0	1		1	4		4
ET299	10	2	0		0	0		0	0		0	0		0	0		0	0		0
ET300	10	2	0		0	0		0	0		0	0		0	0		0	0		0
ET301	10	2	0		0	0		0	0		0	0		0	0		0	0		0
ET302	8	2	0		0	0		0	0		0	0		0	0		0	0		0
ET303	9	2	26		26	0		0	0		0	17		17	0		0	0		0	0		0	0		0	0		0	0		0	0		0	0		0
ET304	9	2	0		0	0		0	0		0	0		0	0		0	0		0
ET305	10	2	0		0	4		4	0		0	0		0	3		3	0		0
ET306	9	2	0		0	0		0	0		0	0		0	0		0	0		0
ET307	10	2	0		0	1		1	0		0	0		0	2		2	0		0
ET308	10	2	0		0	0		0	14		14	0		0	0		0	10		10	0		0	0		0	0		0	0		0	0		0	0		0
ET309	10	2	0		0	0		0	0		0	0		0	0		0	0		0
ET310	10	2	0		0	0		0	0		0	0		0	0		0	0		0
ET311	8	2	0		0	0		0	0		0	0		0	0		0	0		0
ET312	9	2	0		0	2		2	0		0	0		0	3		3	0		0	0		0	0		0	0		0	0		0	0		0	0		0
ET313	10	2	0		0	0		0	3		3	0		0	0		0	2		2	0		0	0		0	0		0	0		0	0		0	0		0
ET314	10	1	0		0	1		1	0		0	0		0	2		2	0		0	0		0	1		1	0		0	0		0	0		0	0		0
ET315	8	1	0		0	0		0	0		0	0		0	0		0	0		0
ET317	8	1	0	0	0	0	0	0	0	0	0	0	0	0	0	0	0	0	0	0
ET318	8	2	14		14	0		0	7		7	9		9	0		0	5		5	0		0	0		0	0		0	0		0	0		0	0		0
ET319	11	2	0		0	0		0	0		0	0		0	0		0	0		0
ET320	7	2	6		6	0		0	9		9	5		5	0		0	9		9	0		0	0		0	0		0	0		0	1		1	0		0
ET321	8	2	69		69	0		0	0		0	72		72	0		0	0		0
ET322	10	2	0		0	0		0	5		5	0		0	0		0	2		2	0		0	0		0	0		0	0		0	0		0	0		0
ET323	12	2	0		0	3		3	0		0	0		0	5		5	0		0	0		0	3		3	0		0	0		0	2		2	0		0
ET324	8	1	0		0	0		0	0		0	0		0	0		0	0		0
ET325	8	2	0		0	4		4	0		0	0		0	2		2	0		0	0		0	2		2	0		0	0		0	0		0	0		0
ET326	10	2	0	0	0	0	0	0	7	2	7	0	0	0	0	0	0	1	1	1	0	0	0	0	0	0	0	0	0	0	0	0	0	0	0	0	0	0
ET327	10	2	0		0	0		0	0		0	0		0	0		0	0		0
ET328	9	2	0		0	0		0	0		0	0		0	0		0	0		0
ET329	12	1	0		0	0		0	0		0	0		0	0		0	0		0
ET330	11	1	0		0	0		0	0		0	0		0	0		0	0		0
ET331	9	2	0		0	0		0	0		0	0		0	0		0	0		0
ET332	9	2	0		0	0		0	0		0	0		0	0		0	0		0
ET333	9	1	0		0	0		0	0		0	0		0	0		0	0		0
ET334	10	1	0		0	0		0	5		5	0		0	0		0	5		5	0		0	0		0	0		0	0		0	0		0	0		0
ET335	8	2	0		0	0		0	0		0	0		0	0		0	0		0
ET336	9	2	0		0	0		0	0		0	0		0	0		0	0		0
ET337	8	2	0	0	0	0	0	0	0	0	0	0	0	0	0	0	0	0	0	0
ET338	9	2	0		0	0		0	0		0	0		0	0		0	0		0
ET339	9	2	0		0	0		0	0		0	0		0	0		0	0		0
ET340	9	1	0	0	0	0	0	0	0	0	0	0	0	0	0	0	0	0	0	0
ET341	6	1	4370		4370	37		37	11		11	4198		4198	34		34	5		5
ET342	7	1	0		0	0		0	0		0	0		0	0		0	0		0
ET343	7	1	0		0	0		0	7		7	0		0	0		0	4		4	0		0	0		0	0		0	0		0	0		0	0		0
ET344	7	1	10		10	0		0	0		0	14		14	0		0	0		0	0		0	0		0	0		0	0		0	0		0	0		0
ET345	7	1	0	0	0	0	0	0	0	0	0	0	0	0	0	0	0	0	0	0
ET346	7	1	0		0	0		0	0		0	0		0	0		0	0		0
ET347	7	2	0		0	4		4	0		0	0		0	3		3	0		0	0		0	1		1	0		0	0		0	1		1	0		0
ET348	8	2	0		0	0		0	0		0	0		0	0		0	0		0
ET349	8	2	0	0	0	0	0	0	0	0	0	0	0	0	2	2	2	0	0	0	0	0	0	0	0	0	0	0	0	0	0	0	2	1	2	0	0	0
ET350	7	2	0		0	13		13	0		0	0		0	19		19	0		0	0		0	10		10	0		0	0		0	14		14	0		0
ET351	9	2	0		0	0		0	0		0	0		0	0		0	0		0
ET352	7	2	0		0	0		0	0		0	0		0	0		0	0		0
ET353	9	2	0	0	0	0	0	0	0	0	0	0	0	0	0	0	0	0	0	0
ET354	7	1	0		0	0		0	18		18	0		0	0		0	19		19	0		0	0		0	0		0	0		0	0		0	0		0
ET355	7	2	0		0	0		0	0		0	0		0	0		0	0		0
ET356	10	1	0		0	0		0	10		10	0		0	0		0	12		12	0		0	0		0	0		0	0		0	0		0	0		0
ET357	7	1	0	0	0	0	2	2	0	0	0	0	0	0	3	3	3	0	0	0
ET358	7	1	0		0	6		6	0		0	0		0	1		1	0		0	0		0	0		0	0		0	0		0	0		0	0		0
ET359	8	1	0	11	11	0	0	0	4	3	4	5	5	5	0	0	0	4	4	4	0		0	3		3	0		0	0		0	0		0	0		0
ET360	7	1	0		0	0		0	0		0	0		0	0		0	0		0	0		0	0		0	0		0	0		0	0		0	0		0
ET361	7	2	0		0	0		0	0		0	0		0	0		0	0		0
ET362	9	2	0		0	0		0	0		0	0		0	0		0	0		0
ET363	7	2	0		0	0		0	0		0	0		0	0		0	0		0
ET364	10	2	0		0	0		0	0		0	0		0	0		0	0		0
ET365	7	2	0		0	0		0	0		0	0		0	0		0	0		0
ET366	7	2	0		0	0		0	0		0	0		0	0		0	0		0
ET367	8	1	0		0	0		0	0		0	0		0	0		0	0		0
ET368	7	2	4		4	0		0	0		0	7		7	0		0	0		0	0		0	0		0	0		0	0		0	0		0	0		0
ET369	6	2	421		421	0		0	0		0	448		448	0		0	0		0	0		0	0		0	0		0	0		0	0		0	0		0
ET370	10	1	154		154	0		0	0		0	168		168	0		0	0		0	0		0	0		0	0		0	0		0	0		0	0		0
ET371	9	2	0		0	10		10	0		0	0		0	6		6	0		0	0		0	2		2	0		0	0		0	6		6	0		0
ET372	9	2	0		0	0		0	0		0	0		0	0		0	0		0	0		0	2		2	0		0	0		0	2		2	0		0
ET373	10	2	178		178	0		0	0		0	164		164	0		0	0		0
ET374	10	2	0		0	0		0	0		0	0		0	0		0	0		0
ET375	12	2	0		0	0		0	0		0	0		0	0		0	0		0
ET376	11	2	0	0	0	0	0	0	0	0	0	0	0	0	0	0	0	0	0	0
ET377	11	2	0		0	0		0	9		9	0		0	0		0	13		13	0		0	0		0	0		0	0		0	0		0	1		1
ET378	11	2	0		0	0		0	0		0	0		0	0		0	0		0
ET379	8	2	0		0	0		0	0		0	0		0	0		0	0		0
ET380	10	1	0		0	5		5	0		0	0		0	2		2	0		0	0		0	4		4	0		0	0		0	5		5	0		0
ET381	9	1	0		0	0		0	0		0	0		0	0		0	0		0
ET382	9	1	0		0	3		3	0		0	0		0	2		2	0		0	0		0	1		1	0		0	0		0	0		0	0		0
ET383	9	1	0		0	0		0	3		3	0		0	0		0	3		3	0		0	0		0	0		0	0		0	0		0	0		0
ET384	11	2	0		0	0		0	0		0	0		0	0		0	0		0
ET385	9	2	0		0	0		0	9		9	0		0	0		0	6		6	0		0	0		0	0		0	0		0	2		2	0		0
ET386	9	2	0		0	0		0	5		5	0		0	0		0	4		4	0		0	0		0	0		0	0		0	0		0	0		0
ET387	9	2	14		14	0		0	0		0	12		12	0		0	0		0	0		0	0		0	0		0	0		0	0		0	0		0
ET388	10	2	687		687	0		0	0		0	617		617	0		0	0		0	0		0	0		0	0		0	0		0	0		0	0		0
ET389	9	2	0	0	0	0	0	0	0	0	0	0	0	0	0	0	0	0	0	0
ET390	9	2	258		258	0		0	0		0	237		237	0		0	0		0	0		0	0		0	0		0	0		0	0		0	0		0
ET391	10	2	8		8	3		3	5		5	10		10	2		2	4		4	0		0	3		3	0		0	0		0	3		3	0		0
ET392	14	1	797		797	2		2	3		3	723		723	2		2	2		2	0		0	5		5	0		0	0		0	3		3	3		3
ET393	10	1	0		0	2		2	0		0	0		0	3		3	0		0	0		0	1		1	0		0	0		0	1		1	0		0
ET394	13	1	58		58	0		0	6		6	64		64	0		0	2		2	0		0	0		0	6		6	0		0	0		0	5		5
ET395	10	1	960		960	3		3	0		0	803		803	4		4	0		0	0		0	0		0	0		0	0		0	0		0	0		0
ET396	8	1	252		252	12		12	0		0	304		304	13		13	0		0	0		0	0		0	0		0	0		0	0		0	0		0
ET397	8	2	0	0	0	5	5	5	0	0	0	0	0	0	5	5	5	0	0	0	0	0	0	0	0	0	0	0	0	0	0	0	0	0	0	0	0	0
ET398	8	2	0		0	0		0	9		9	0		0	0		0	10		10	0		0	0		0	0		0	0		0	0		0	0		0
ET399	9	1	0		0	0		0	0		0	0		0	0		0	0		0
ET400	10	1	43		43	0		0	0		0	40		40	0		0	0		0	0		0	0		0	0		0	0		0	0		0	0		0
ET401	10	1	0		0	0		0	0		0	0		0	0		0	0		0
ET402	11	1	18		18	5		5	21		21	23		23	4		4	13		13	0		0	0		0	0		0	0		0	0		0	0		0
ET403	10	2	91		91	0		0	0		0	78		78	0		0	0		0	0		0	0		0	0		0	0		0	0		0	0		0
ET404	8	2	0	0	0	0	0	0	0	0	0	0	0	0	0	0	0	0	0	0
ET405	8	2	0		0	0		0	0		0	0		0	0		0	0		0
ET406	9	2	16		16	0		0	31		31	9		9	0		0	27		27	0		0	0		0	3		3	0		0	0		0	4		4
ET407	9	2	0	0	0	0	0	0	0	0	0	0	0	0	1	1	1	0	0	0	0		0	0		0	0		0	0		0	0		0	0		0
ET408	9	2	0		0	1		1	0		0	0		0	1		1	0		0	0		0	0		0	0		0	0		0	0		0	0		0
ET409	9	2	0		0	0		0	4		4	0		0	0		0	3		3	0		0	0		0	0		0	0		0	0		0	0		0
ET410	7	1	0		0	0		0	0		0	0		0	0		0	0		0
ET411	7	2	0		0	8		8	0		0	0		0	5		5	0		0	0	0	0	7	17	7	0	0	0	0	0	0	25	24	25	0	0	0
ET412	10	1	35		35	5		5	6		6	29		29	3		3	9		9	0		0	0		0	0		0	0		0	0		0	0		0
ET413	10	1	0		0	1		1	4		4	0		0	1		1	2		2	0		0	0		0	0		0	0		0	2		2	0		0
ET414	8	1	1553		1553	4		4	6		6	1648		1648	3		3	4		4	0		0	0		0	0		0	0		0	0		0	0		0
ET415	7	1	240		240	0		0	0		0	280		280	0		0	0		0	0		0	0		0	0		0	0		0	0		0	0		0
ET416	7	1	0		0	0		0	0		0	0		0	0		0	0		0
ET417	8	1	0		0	0		0	0		0	0		0	0		0	0		0
ET418	8	1	33		33	0		0	0		0	37		37	0		0	0		0
ET419	7	1	0		0	0		0	4		4	0		0	0		0	1		1	0		0	0		0	0		0	0		0	0		0	0		0
ET420	10	1	937		937	7		7	0		0	995		995	8		8	0		0	0		0	3		3	0		0	0		0	2		2	0		0
ET421	8	1	495		495	0		0	0		0	492		492	0		0	0		0	0		0	1		1	0		0	0		0	0		0	0		0
ET422	8	1	0	0	0	11	13	11	0	0	0	0	0	0	15	17	15	0	0	0	0	0	0	0	2	2	0	0	0	0	0	0	6	6	6	0	0	0
ET423	10	1	305		305	5		5	15		15	240		240	9		9	8		8	0		0	0		0	2		2	0		0	0		0	1		1
ET424	8	2	38		38	8		8	0		0	45		45	6		6	0		0	0	0	0	0	2	2	0	0	0	0	0	0	4	4	4	0	0	0
ET425	8	2	0		0	0		0	0		0	0		0	0		0	0		0
ET426	9	2	0		0	0		0	0		0	0		0	0		0	0		0
ET427	9	2	0		0	0		0	0		0	0		0	0		0	0		0
ET428	9	2	2		2	0		0	0		0	2		2	0		0	0		0	0		0	0		0	0		0	0		0	0		0	0		0
ET429	9	2	0		0	0		0	0		0	0		0	0		0	0		0
ET430	9	2	0		0	0		0	0		0	0		0	0		0	0		0
ET431	9	1	0		0	0		0	0		0	0		0	0		0	0		0
ET432	9	1	139		139	5		5	6		6	151		151	0		0	2		2	0		0	0		0	0		0	0		0	0		0	0		0
ET433	13	1	0	0	0	0	2	2	214	214	214	0	0	0	2	0	2	231	231	231	0		0	3		3	0		0	0		0	3		3	0		0
ET434	10	1	0		0	1		1	0		0	0		0	6		6	0		0	0		0	1		1	0		0	0		0	3		3	0		0
ET435	10	1	0	0	0	0	0	0	0	0	0	0	0	0	0	0	0	0	0	0
ET436	10	1	0		0	3		3	0		0	0		0	6		6	0		0	0	0	0	0	3	3	0	0	0	0	0	0	2	2	2	0	0	0
ET437	10	2	13	12	13	0	0	0	0	0	0	13	11	13	0	0	0	0	0	0	0	0	0	0	0	0	0	0	0	0	0	0	0	0	0	0	0	0
ET438	10	2	0	0	0	0	1	1	0	0	0	0	0	0	2	2	2	0	0	0	0		0	0		0	0		0	0		0	0		0	0		0
ET439	11	1	0		0	0		0	11		11	0		0	0		0	14		14	0		0	0		0	4		4	0		0	0		0	3		3
ET440	10	1	1		1	0		0	2		2	0		0	0		0	3		3	0		0	0		0	0		0	0		0	0		0	0		0
ET441	13	1	44	50	44	3	2	3	0	0	0	60	54	60	6	5	6	0	0	0	0	0	0	8	8	8	0	0	0	0	0	0	8	9	8	0	0	0
ET442	12	2	0		0	11		11	102		102	0		0	15		15	96		96
ET443	8	1	0		0	0		0	0		0	0		0	0		0	0		0
ET444	13	2	0		0	0		0	0		0	0		0	0		0	0		0
ET445	9	2	38		38	0		0	3		3	28		28	0		0	2		2	0		0	12		12	0		0	0		0	28		28	0		0
ET446	11	1	810	850	810	42	44	42	2	2	2	740	810	740	31	38	31	5	3	3	0	0	0	20	28	20	0	0	0	0	0	0	17	22	17	0	0	0
ET447	7	1	472		472	34		34	3		3	512		512	33		33	6		6
ET448	8	1	0		0	0		0	0		0	0		0	0		0	0		0
ET449	8	1	0	0	0	0	0	0	0	0	0	0	0	0	0	0	0	0	0	0
ET450	7	1	0		0	0		0	0		0	0		0	0		0	0		0
ET451	10	1	19		19	2		2	4		4	21		21	3		3	3		3	0		0	0		0	1		1	0		0	0		0	2		2
ET452	7	1	0		0	1		1	0		0	0		0	2		2	0		0	0		0	1		1	0		0	0		0	2		2	0		0
ET453	13	2	0		0	0		0	0		0	0		0	0		0	0		0
ET454	10	2	3		3	0		0	0		0	8		8	0		0	0		0	0		0	0		0	0		0	0		0	0		0	0		0
ET455	7	2	0		0	0		0	0		0	0		0	0		0	0		0
ET456	8	2	0	0	0	31	28	31	0	0	0	0	0	0	26	18	26	0	0	0	0		0	0		0	0		0	0		0	0		0	0		0
ET457	11	1	0		0	0		0	0		0	0		0	0		0	0		0
ET458	6	2	0		0	0		0	0		0	0		0	0		0	0		0
ET459	10	2	0		0	0		0	19		19	0		0	0		0	14		14	0		0	0		0	0		0	0		0	0		0	0		0
ET460	8	1	0		0	5		5	0		0	0		0	6		6	0		0	0		0	0		0	0		0	0		0	0		0	0		0
ET461	7	1	0		0	53		53	0		0	0		0	28		28	0		0	0		0	21		21	0		0	0		0	20		20	0		0
ET462	7	2	0		0	0		0	0		0	0		0	0		0	0		0
ET463	10	2	0		0	0		0	0		0	0		0	0		0	0		0
ET464	10	2	1321		1321	48		48	7		7	1381		1381	38		38	12		12	0		0	44		44	0		0	0		0	44		44	0		0
ET465	10	2	0		0	5		5	0		0	0		0	4		4	0		0
ET466	7	1	0		0	0		0	0		0	0		0	0		0	0		0
ET467	7	1	3128		3128	32		32	3		3	3164		3164	23		23	3		3	0		0	0		0	0		0	0		0	1		1	0		0
ET468	9	1	0	0	0	0	0	0	13	10	13	0	0	0	0	0	0	13	12	13	0	0	0	0	0	0	0	0	0	0	0	0	0	0	0	0	0	0
ET469	8	2	0		0	0		0	0		0	0		0	0		0	0		0
ET470	7	2	0		0	0		0	0		0	0		0	0		0	0		0
ET471	8	1	0		0	0		0	0		0	0		0	0		0	0		0
ET472	12	2	0	0	0	9	6	9	0	0	0	0	0	0	5	4	5	0	0	0	0	0	0	0	0	0	0	0	0	0	0	0	0	0	0	0	0	0
ET473	8	2	0	0	0	7	6	7	0	0	0	0	0	0	0	4	4	0	0	0	0	0	0	41	40	41	0	0	0	0	0	0	43	39	43	0	0	0
ET474	8	2	18		18	5		5	0		0	14		14	5		5	0		0	0		0	22		22	0		0	0		0	28		28	0		0
ET475	8	1	0		0	4		4	0		0	0		0	6		6	0		0	0		0	0		0	0		0	0		0	0		0	0		0
ET476	8	2	0		0	0		0	0		0	0		0	0		0	0		0
ET477	7	1	0		0	0		0	0		0	0		0	0		0	0		0
ET478	9	2	1380	1279	1380	89	14	14	89	79	89	813	1390	1390	16	22	16	61	86	86	0		0	4		4	0		0	0		0	3		3	0		0
ET479	7	2	0		0	49		49	8		8	0		0	54		54	11		11	0		0	48		48	0		0	0		0	56		56	0		0
ET480	11	2	0	0	0	3	2	3	0	0	0	1	1	1	3	2	3	0	0	0	0	0	0	0	0	0	0	0	0	0	0	0	0	0	0	0	0	0
ET481	12	2	1	0	0	6	4	6	0	0	0	0	0	0	5	3	5	0	0	0	0	0	0	5	4	5	0	0	0	0	0	0	9	8	9	0	0	0
ET482	12	2	0	0	0	0	0	0	6	5	6	0	0	0	0	0	0	8	7	8
ET483	13	2	0		0	0		0	1		1	0		0	0		0	2		2
ET484	7	2	0		0	0		0	0		0	0		0	0		0	0		0
ET485	7	1	0	0	0	6	6	6	0	0	0	0	0	0	6	6	6	0	0	0	0	0	0	0	0	0	0	0	0	0	0	0	0	0	0	0	0	0
ET486	11	2	0		0	0		0	8		8	0		0	0		0	7		7	0		0	0		0	0		0	0		0	0		0	0		0
ET487	13	2	0		0	50		50	0		0	0		0	48		48	0		0	0		0	30		30	0		0	0		0	27		27	0		0
ET488	9	2	0		0	0		0	3		3	0		0	0		0	6		6	0		0	0		0	0		0	0		0	0		0	0		0
ET489	8	1	0		0	2		2	0		0	0		0	6		6	0		0	0		0	12		12	0		0	0		0	9		9	0		0
ET490	7	1	0		0	0		0	0		0	0		0	0		0	0		0
ET491	9	2	0		0	2		2	0		0	0		0	4		4	0		0	0		0	4		4	0		0	0		0	3		3	0		0
ET492	8	2	0		0	0		0	1		1	0		0	0		0	2		2	0		0	0		0	0		0	0		0	0		0	0		0
ET493	10	2	0		0	0		0	0		0	0		0	0		0	0		0
ET494	7	1	0		0	4		4	0		0	0		0	6		6	0		0	0		0	0		0	0		0	0		0	0		0	0		0
ET495	7	2	0		0	2		2	4		4	0		0	6		6	4		4	0		0	5		5	0		0	0		0	2		2	0		0
ET496	9	2	0		0	5		5	2		2	0		0	5		5	0		0	0		0	0		0	0		0	0		0	0		0	0		0
			495	73	495	495	73	495	495	73	495	495	73	495	495	73	495	495	73	495	253	35	253	253	35	253	253	35	253	253	35	253	253	35	253	253	35	253
			SWISS	11			6			4			8			5			4			1			7			0			0			1			1
			WHO	17			10			8			11			8			5			1			8			0			0			3			1

## Sheet: ETH_ERR
dKK		BL_AS	FU_AS	BL_TT	FU_TT	BL_HW	FU_HW		BL_AS	FU_AS	BL_TT	FU_TT	BL_HW	FU_HW
		6292	0	105	7	445	0		6292	0	103	104	445	0
		5708	0	103	104	150	0		5708	0	98	57	175	0
		5202	0	98	57	136	7		5202	0	86	66	136	7
		5022	0	86	66	103	0		5022	0	86	88	85	0
		4612	0	86	88	67	10		4612	0	81	41	58	7
		4580	0	81	41	58	7		4580	0	76	0	55	10
		4489	0	76	0	53	1		4489	0	73	37	53	1
		3201	0	73	37	43	0		3201	0	66	28	43	0
		2702	0	66	28	37	0		2770	0	57	0	37	0
		2409	0	57	0	34	0		2702	0	55	1	36	0
		2193	0	55	1	33	0		2409	0	42	14	34	0
		1932	0	42	14	30	0		2250	0	35	0	33	0
		1892	0	35	0	30	2		1932	0	33	0	30	0
		1831	0	33	0	29	0		1892	0	32	24	30	2
		1763	0	32	24	26	0		1831	0	30	7	29	0
		1669	0	28	0	25	0		1763	0	28	0	26	0
		1550	0	28	15	25	7		1550	0	28	15	25	0
		1520	0	27	5	24	0		1520	0	27	5	25	7
		1378	0	26	6	24	0		1378	0	26	8	24	0
		1343	0	25	3	24	0		1343	0	25	3	24	0
		1304	0	25	0	23	3		1304	0	25	0	24	0
		1234	0	24	0	22	4		1234	0	24	0	23	3
		1229	0	23	3	22	0		1229	0	23	3	22	4
		1037	0	21	21	22	1		1042	9	21	21	22	0
		987	0	21	10	21	2		1037	0	21	10	22	1
		882	0	18	11	21	0		987	0	18	11	21	0
		869	0	16	7	20	1		882	0	16	7	20	1
		857	0	16	8	19	0		869	0	16	8	19	0
		842	0	15	2	19	0		857	0	15	2	19	0
		831	0	15	1	19	0		842	0	15	1	19	0
		808	0	15	0	19	0		831	0	15	0	19	0
		748	0	15	3	18	0		808	0	15	3	18	0
		739	0	15	6	18	0		792	0	15	8	18	0
		725	0	15	0	18	0		748	0	15	0	18	0
		688	0	15	5	16	2		739	0	15	5	16	2
		626	0	14	8	16	0		725	0	14	8	16	0
		609	0	14	0	15	0		688	0	14	0	15	0
		578	0	14	4	15	0		626	0	14	6	15	0
		556	0	14	0	15	0		609	0	14	0	15	0
		545	0	13	2	13	0		573	0	13	2	13	0
		535	0	13	32	13	0		556	0	13	32	13	0
		520	0	12	21	12	0		545	0	12	21	12	0
		498	0	12	16	11	0		535	0	12	16	11	0
		495	0	12	4	11	0		520	0	12	4	11	6
		471	0	12	0	11	0		495	0	12	0	11	0
		453	0	12	4	10	6		471	0	12	4	11	0
		451	0	12	0	10	0		453	0	12	0	10	6
		429	0	11	6	10	0		451	0	11	6	10	0
		426	0	11	0	9	0		429	0	11	0	10	0
		397	0	11	14	9	0		426	0	11	84	9	0
		381	0	10	8	9	0		397	0	11	14	9	0
		367	0	10	1	9	0		381	0	10	8	9	0
		342	9	10	0	8	0		367	0	10	1	9	0
		322	0	10	0	8	0		322	0	10	0	8	0
		296	0	10	0	8	6		296	0	10	0	8	0
		290	0	10	50	8	0		290	0	10	0	8	0
		271	0	10	0	8	0		271	0	10	50	8	0
		269	0	10	0	8	11		269	0	10	0	8	11
		250	0	10	0	8	0		250	0	10	0	8	0
		193	0	9	0	8	0		205	0	10	0	8	0
		189	0	9	0	7	0		193	0	9	0	7	0
		189	0	9	2	7	0		189	0	9	1	7	0
		170	0	9	16	7	0		189	0	9	0	7	3
		169	0	8	2	7	3		170	0	9	5	6	2
		169	0	8	1	6	2		169	0	9	16	6	4
		154	0	8	4	6	4		154	0	8	2	6	0
		143	0	8	19	6	0		143	0	8	1	6	0
		138	0	8	0	6	0		138	0	8	8	6	0
		127	0	8	5	6	0		127	0	8	19	6	0
		125	0	8	0	6	0		125	0	8	0	5	0
		124	0	8	21	5	0		124	0	8	5	5	0
		123	0	8	7	5	0		123	0	8	0	5	0
		122	0	7	6	5	0		122	0	8	21	5	0
		117	0	7	0	5	0		118	0	8	7	5	3
		107	0	7	18	5	3		117	0	7	6	5	0
		104	0	7	2	5	0		107	0	7	0	5	0
		97	0	7	0	5	0		107	0	7	18	5	0
		97	0	7	2	5	0		104	0	7	2	5	0
		90	5	7	2	4	0		97	0	7	0	4	0
		84	0	7	0	4	0		90	5	7	2	4	0
		83	0	7	9	4	0		83	0	7	2	4	0
		83	0	7	0	4	0		83	0	7	0	4	0
		83	0	7	0	4	0		83	0	7	9	4	0
		83	0	7	4	4	0		83	0	7	0	4	0
		78	0	7	84	3	0		78	0	7	0	3	0
		75	0	6	0	3	0		75	0	7	4	3	0
		71	0	6	1	3	0		71	0	6	0	3	0
		70	0	6	3	3	0		66	0	6	1	3	0
		66	0	6	0	2	0		64	0	6	3	3	0
		64	0	6	0	2	0		60	0	6	0	3	0
		60	0	6	2	2	0		60	0	6	0	2	0
		60	0	6	0	2	0		58	0	6	2	2	0
		51	0	6	7	2	4		56	0	6	0	2	0
		44	0	5	8	2	0		51	0	6	7	2	4
		43	0	5	0	1	0		44	0	5	8	2	0
		41	0	5	1	1	0		43	0	5	0	1	0
		40	0	5	3	1	0		41	0	5	3
		39	0	5	0				40	0	5	0
		35	0	5	1				39	0	5	1
		35	0	5	6				35	0	5	6
		35	0	5	2				35	0	5	2
		33	0	5	0				33	0	5	0
		32	0	5	0				32	0	5	0
		31	0	4	2				31	0	4	2
		28	0	4	0				28	0	4	0
		26	0	4	0				26	0	4	0
		26	0	4	0				26	0	4	0
		25	0	4	45				25	0	4	45
		24	0	4	0				24	0	4	0
		23	50	4	3				23	50	4	3
		23	0	4	7				23	0	4	7
		18	0	4	8				18	0	4	8
		18	0	3	4				18	0	4	6
		17	0	3	0				17	0	3	4
		15	0	3	5				16	0	3	0
		14	0	3	4				16	0	3	5
		14	0	3	4				15	0	3	6
		13	0	3	1				14	0	3	4
		13	0	3	3				14	0	3	4
		13	0	2	3				13	0	3	1
		12	0	2	0				13	0	3	0
		11	0	2	0				13	0	3	3
		11	0	2	6				11	0	2	3
		11	0	2	11				11	0	2	0
		8	0	2	2				11	0	2	0
		5	0	2	0				8	0	2	11
		5	0	2	2				5	0	2	2
		5	0	2	6				5	0	2	0
		4	0	2	0				4	0	2	2
		2	0	1	0				2	0	1	0
		1	0	1	0				1	0	1	0
		1	0	1	0				1	0	1	0
		1	0	1	0				1	0	1	0
		1	0	1	0				1	0	1	0
		1	0	1	0						1	0
				1	0						1	1
				1	1						1	2
				1	2						1	0
				1	0
		135	3	139	85	97	20		134	3	138	85	96	19
		666.667	0.474074	15.0504	7.91367	21.7526	0.886598		688.433	0.477612	14.6957	8.06522	22.1146	0.875
		99.9289		47.4187		95.9242			99.9306		45.1183		96.0433

## Sheet: LAO
SubjectID	Age	Sex	BL_KKA_AL	BL_KKA_AL_QC	BL_KKA_AL_postQC	BL_KKA_TT	BL_KKA_TT_QC	BL_KKA_TT_postQC	BL_KKA_HW	BL_KKA_HW_QC	BL_KKA_HW_postQC	BL_KKB_AL	BL_KKB_AL_QC	BL_KKB_AL_PostQC	BL_KKB_TT	BL_KKB_TT_QC	BL_KKB_TT_postQC	BL_KKB_HW	BL_KKB_HW_QC	BL_KKB_HW_postQC	FU_KKA_AL	FU_KKA_AL_QC	FU_KKA_AL_postQC	FU_KKA_TT	FU_KKA_TT_QC	FU_KKA_TT_postQC	FU_KKA_HW	FU_KKA_HW_QC	FU_KKA_HW_postQC	FU_KKB_AL	FU_KKB_AL_QC	FU_KKB_AL_PostQC	FU_KKB_TT	FU_KKB_TT_QC	FU_KKB_TT_postQC	FU_KKB_HW	FU_KKB_HW_QC	FU_KKB_HW_postQC
LA001	6	1	0		0	0		0	0		0	0		0	0		0	0		0
LA002	6	2	30		30	0		0	0		0	24		24	0		0	0		0	0		0	0		0	0		0	0		0	0		0	0		0
LA003	6	1	0		0	0		0	0		0	0		0	0		0	0		0
LA004	6	1	0		0	0		0	0		0	0		0	0		0	0		0
LA005	6	2	0		0	0		0	0		0	0		0	0		0	0		0
LA006	7	2	6291		6291	394		394	91		91	5067		5067	430		430	87		87	0		0	144		144	0		0	0		0	140		140	0		0
LA007	6	1	0		0	0		0	0		0	0		0	0		0	0		0
LA008	6	2	0		0	0		0	0		0	0		0	0		0	0		0
LA009	6	2	0		0	0		0	0		0	0		0	0		0	0		0
LA010	6	2	0		0	0		0	0		0	0		0	0		0	0		0
LA011	6	1	0		0	0		0	0		0	0		0	0		0	0		0
LA012	5	1	0		0	0		0	0		0	0		0	0		0	0		0
LA013	5	2	0	0	0	0	0	0	0	0	0	0	0	0	0	0	0	0	0	0
LA014	6	2	0		0	0		0	0		0	0		0	0		0	0		0
LA015	6	2	0		0	0		0	0		0	0		0	0		0	0		0
LA016	7	1	0		0	0		0	0		0	0		0	0		0	0		0
LA017	7	2	0		0	0		0	0		0	0		0	0		0	0		0
LA018	8	2	0	0	0	30	31	30	1	1	1	0	0	0	46	46	46	3	3	3	0		0	140		140	0		0	0		0	139		139	0		0
LA019	5	2	0		0	0		0	0		0	0		0	0		0	0		0
LA020	7	2	0		0	10		10	0		0	0		0	22		22	0		0	0		0	26		26	0		0	0		0	23		23	0		0
LA021	5	2	0		0	0		0	0		0	0		0	1		1	0		0	0		0	0		0	0		0	0		0	0		0	0		0
LA022	5	2	0		0	0		0	0		0	0		0	0		0	0		0
LA023	7	1	0		0	0		0	0		0	0		0	0		0	0		0
LA024	5	2	0		0	0		0	0		0	0		0	0		0	0		0
LA025	6	2	0		0	44		44	81		81	0		0	25		25	44		44	0		0	54		54	58		58	0		0	48		48	36		36
LA026	5	2	0		0	2		2	0		0	0		0	6		6	0		0
LA027	5	2	0		0	0		0	0		0	0		0	0		0	0		0
LA028	5	2	0		0	0		0	0		0	0		0	0		0	0		0
LA029	7	2	0		0	0		0	0		0	0		0	0		0	0		0
LA030	5	2	0		0	0		0	0		0	0		0	0		0	0		0
LA031	6	2	0		0	0		0	0		0	0		0	0		0	0		0
LA032	5	2	0		0	2		2	0		0	0		0	2		2	0		0
LA033	5	1	0		0	0		0	0		0	0		0	0		0	0		0	0		0	0		0	0		0	0		0	0		0	0		0
LA034	5	2	0		0	0		0	0		0	0		0	0		0	0		0
LA035	8	2	0		0	0		0	0		0	0		0	0		0	0		0
LA036	8	1	0		0	0		0	0		0	0		0	0		0	0		0	0		0	0		0	0		0	0		0	0		0	0		0
LA037	7	2	0		0	0		0	0		0	0		0	0		0	0		0
LA038	5	1	0		0	0		0	0		0	0		0	0		0	0		0
LA039	5	2	0		0	0		0	0		0	0		0	0		0	0		0
LA040	8	2	0		0	0		0	13		13	0		0	0		0	12		12
LA041	6	1	0		0	0		0	0		0	0		0	0		0	0		0
LA042	7	2	0		0	0		0	0		0	0		0	0		0	0		0
LA043	5	2	0		0	0		0	0		0	0		0	0		0	0		0
LA044	7	2	0		0	0		0	0		0	0		0	0		0	0		0
LA045	7	2	0		0	0		0	0		0	0		0	0		0	0		0
LA046	8	1	-1		-1	-1		-1	-1		-1	-1		-1	-1		-1	-1		-1
LA047	6	2	0		0	0		0	0		0	0		0	0		0	0		0
LA048	10	1	0		0	0		0	0		0	0		0	0		0	0		0
LA049	9	1	0		0	0		0	0		0	0		0	0		0	0		0
LA050	10	1	0		0	0		0	0		0	0		0	0		0	0		0
LA051	9	1	0		0	0		0	0		0	0		0	0		0	0		0
LA052	10	1	0		0	0		0	1		1	0		0	0		0	0		0	0		0	0		0	0		0	0		0	0		0	0		0
LA053	9	1	68		68	0		0	42		42	45		45	0		0	43		43	0		0	0		0	2		2	0		0	0		0	1		1
LA054	9	2	0	0	0	0	0	0	0	0	0	0	0	0	0	0	0	0	0	0
LA055	10	2	0		0	30		30	48		48	0		0	16		16	56		56	0		0	0		0	0		0	0		0	0		0	0		0
LA056	10	1	0		0	8		8	12		12	0		0	7		7	4		4	0		0	21		21	0		0	0		0	18		18	0		0
LA057	8	1	0		0	0		0	7		7	0		0	0		0	2		2	0		0	0		0	0		0	0		0	0		0	0		0
LA058	8	1	0		0	2		2	0		0	0		0	0		0	0		0	0		0	6		6	0		0	0		0	6		6	0		0
LA059	9	1	0	0	0	0	0	0	0	0	0	0	0	0	0	0	0	0	0	0
LA060	10	2	0		0	0		0	0		0	0		0	0		0	0		0
LA061	8	2	0		0	0		0	0		0	0		0	0		0	0		0
LA062	10	1	0		0	0		0	0		0	0		0	0		0	0		0
LA063	9	1	0		0	0		0	0		0	0		0	0		0	0		0
LA064	13	1	0		0	0		0	0		0	0		0	0		0	0		0
LA065	10	1	0		0	0		0	0		0	0		0	0		0	0		0
LA066	11	1	0		0	0		0	27		27	0		0	0		0	29		29	0		0	1		1	0		0	0		0	3		3	0		0
LA067	9	1	0		0	0		0	0		0	0		0	0		0	13		13	0		0	0		0	0		0	0		0	0		0	0		0
LA068	12	1	0		0	0		0	19		19	0		0	0		0	22		22	0		0	0		0	0		0	0		0	0		0	0		0
LA069	11	2	0		0	0		0	0		0	0		0	0		0	0		0
LA070	9	1	16		16	0		0	3		3	19		19	0		0	9		9	0		0	0		0	0		0	0		0	0		0	0		0
LA071	9	1	1		1	0		0	0		0	0		0	0		0	0		0
LA072	11	2	0		0	0		0	0		0	0		0	0		0	0		0
LA073	12	2	0		0	0		0	0		0	0		0	0		0	0		0
LA074	9	1	0		0	0		0	0		0	0		0	0		0	0		0
LA075	8	2	0		0	0		0	0		0	0		0	0		0	0		0
LA076	9	2	0		0	0		0	0		0	0		0	0		0	0		0
LA077	5	2	1		1	0		0	0		0	0		0	0		0	0		0
LA078	8	1	0		0	0		0	2		2	0		0	0		0	6		6	0		0	0		0	0		0	0		0	0		0	0		0
LA079	9	2	0	0	0	0	0	0	0	0	0	0	0	0	0	0	0	0	0	0
LA080	6	2	0	0	0	0	0	0	0	0	0	0	0	0	0	0	0	0	0	0
LA081	9	2	0		0	0		0	0		0	0		0	0		0	0		0
LA082	10	2	0		0	0		0	3		3	0		0	0		0	4		4	0		0	0		0	0		0	0		0	0		0	0		0
LA083	10	2	0		0	0		0	211		211	0		0	0		0	139		139	0		0	0		0	0		0	0		0	0		0	0		0
LA084	12	1	0		0	1		1	50		50	0		0	1		1	49		49	0		0	0		0	0		0	0		0	0		0	0		0
LA085	12	2	0		0	0		0	12		12	0		0	0		0	11		11	0		0	3		3	2		2	0		0	5		5	3		3
LA086	12	1	0		0	0		0	22		22	0		0	0		0	12		12	0		0	0		0	24		24	0		0	0		0	2		2
LA087	12	2	0		0	0		0	0		0	0		0	0		0	0		0
LA088	14	2	15		15	0		0	8		8	12		12	0		0	22		22	0		0	0		0	1		1	0		0	0		0	2		2
LA089	13	2	0		0	22		22	50		50	0		0	15		15	49		49	1		1	1		1	3		3	1		1	1		1	2		2
LA090	13	2	0		0	0		0	0		0	0		0	0		0	0		0
LA091	13	2	0		0	0		0	10		10	0		0	0		0	12		12	0		0	0		0	9		9	0		0	0		0	5		5
LA092	12	2	0		0	0		0	0		0	0		0	0		0	0		0
LA093	13	2	0		0	0		0	253		253	0		0	0		0	118		118	0		0	0		0	0		0	0		0	0		0	0		0
LA094	11	2	0	0	0	0	0	0	0	0	0	0	0	0	0	0	0	0	0	0
LA095	12	2	0	0	0	0	0	0	0	0	0	0	0	0	0	0	0	0	0	0
LA096	12	1	0		0	0		0	0		0	0		0	0		0	0		0
LA097	12	1	0		0	0		0	89		89	0		0	0		0	51		51	0		0	0		0	3		3	0		0	0		0	3		3
LA098	12	1	59		59	3		3	18		18	32		32	3		3	9		9	0		0	1		1	2		2	0		0	1		1	4		4
LA099	12	1	0		0	1		1	0		0	0		0	3		3	0		0	0		0	2		2	0		0	0		0	0		0	0		0
LA100	12	1	0		0	0		0	0		0	0		0	0		0	0		0
LA101	12	1	0		0	0		0	0		0	0		0	0		0	0		0
LA102	12	1	0		0	0		0	0		0	0		0	0		0	0		0
LA103	12	1	0		0	0		0	4		4	0		0	0		0	4		4	0		0	0		0	0		0	0		0	0		0	0		0
LA104	12	1	0		0	0		0	9		9	0		0	0		0	2		2	0		0	0		0	1		1	0		0	0		0	2		2
LA105	13	1	0		0	0		0	14		14	0		0	0		0	6		6	0		0	0		0	15		15	0		0	0		0	4		4
LA106	13	1	0		0	0		0	56		56	0		0	0		0	119		119	0		0	4		4	13		13	0		0	2		2	19		19
LA107	13	1	0		0	0		0	0		0	0		0	0		0	0		0
LA108	14	2	0		0	0		0	2		2	0		0	0		0	0		0	0		0	0		0	0		0	0		0	0		0	0		0
LA109	13	2	0		0	10		10	2		2	0		0	12		12	8		8	0		0	4		4	7		7	0		0	9		9	4		4
LA110	12	2	0		0	1		1	0		0	0		0	0		0	0		0	0		0	1		1	0		0	0		0	2		2	0		0
LA111	11	2	0		0	0		0	0		0	0		0	0		0	0		0
LA112	13	2	0		0	0		0	1		1	0		0	0		0	1		1	0		0	0		0	0		0	0		0	0		0	0		0
LA113	12	2	0		0	0		0	11		11	0		0	0		0	9		9	0	0	0	0	0	0	0	0	0	0	0	0	0	0	0	0	0	0
LA114	10	2	0		0	0		0	0		0	0		0	0		0	0		0
LA115	12	2	0		0	11		11	6		6	0		0	2		2	9		9	0		0	2		2	0		0	0		0	1		1	0		0
LA116	11	2	0		0	0		0	0		0	0		0	0		0	0		0
LA117	11	2	0		0	0		0	2		2	0		0	0		0	0		0	0		0	0		0	0		0	0		0	0		0	0		0
LA118	12	1	0		0	3		3	14		14	0		0	2		2	16		16	0		0	2		2	0		0	0		0	1		1	0		0
LA119	11	2	0		0	0		0	0		0	0		0	0		0	0		0
LA120	11	1	0		0	0		0	0		0	0		0	0		0	0		0
LA121	11	2	0		0	0		0	22		22	0		0	0		0	9		9	0		0	0		0	0		0	0		0	0		0	0		0
LA122	10	2	0		0	0		0	0		0	0		0	0		0	0		0
LA123	13	2	0		0	0		0	0		0	0		0	0		0	0		0
LA124	13	2	0		0	0		0	5		5	0		0	0		0	1		1	0		0	0		0	6		6	0		0	0		0	7		7
LA125	12	1	0		0	0		0	0		0	0		0	0		0	0		0
LA126	13	1	18		18	0		0	1		1	23		23	0		0	2		2
LA127	13	2	172		172	0		0	0		0	217		217	0		0	0		0	0		0	0		0	0		0	0		0	0		0	0		0
LA128	10	2	0		0	0		0	0		0	0		0	0		0	0		0
LA129	14	2	0		0	0		0	0		0	0		0	0		0	0		0
LA130	13	2	0		0	0		0	0		0	0		0	0		0	0		0
LA131	13	2	0		0	0		0	0		0	0		0	0		0	0		0
LA132	13	2	0		0	0		0	0		0	0		0	0		0	0		0
LA133	13	2	0		0	0		0	9		9	0		0	0		0	14		14	0		0	0		0	0		0	0		0	0		0	0		0
LA134	12	2	0		0	0		0	0		0	0		0	0		0	0		0
LA135	13	2	0		0	0		0	0		0	0		0	0		0	0		0
LA136	13	2	0		0	0		0	0		0	0		0	0		0	0		0
LA137	13	2	0		0	0		0	0		0	0		0	0		0	0		0
LA138	13	2	0		0	0		0	0		0	0		0	0		0	0		0
LA139	12	2	0		0	0		0	0		0	0		0	0		0	0		0
LA140	13	2	0		0	0		0	0		0	0		0	0		0	0		0
LA141	13	1	0		0	0		0	3		3	0		0	0		0	3		3	0		0	0		0	0		0	0		0	0		0	0		0
LA142	14	1	0		0	0		0	0		0	0		0	0		0	0		0
LA143	14	1	0		0	0		0	10		10	0		0	0		0	9		9	0		0	0		0	0		0	0		0	0		0	0		0
LA144	14	1	0		0	0		0	0		0	0		0	0		0	0		0
LA145	14	1	0		0	0		0	3		3	0		0	0		0	10		10	0		0	0		0	0		0	0		0	0		0	0		0
LA146	14	1	0		0	0		0	0		0	0		0	0		0	0		0
LA147	13	1	0		0	0		0	0		0	0		0	0		0	0		0
LA148	14	1	0		0	0		0	470		470	0		0	0		0	381		381	0		0	0		0	0		0	0		0	0		0	0		0
LA149	14	1	0		0	0		0	121		121	0		0	0		0	93		93	0		0	0		0	1		1	0		0	0		0	1		1
LA150	14	2	0		0	0		0	0		0	0		0	0		0	0		0
LA151	14	2	0		0	0		0	6		6	0		0	0		0	8		8	0		0	0		0	0		0	0		0	0		0	0		0
LA152	13	2	0		0	0		0	0		0	0		0	0		0	0		0
LA153	13	2	0		0	0		0	0		0	0		0	0		0	0		0
LA154	14	2	0		0	0		0	0		0	0		0	0		0	0		0
LA155	14	2	0		0	0		0	0		0	0		0	0		0	0		0
LA156	7	2	0		0	0		0	0		0	0		0	0		0	0		0
LA157	7	2	0		0	0		0	0		0	0		0	0		0	0		0
LA158	5	1	0		0	0		0	0		0	0		0	0		0	0		0
LA159	8	1	0		0	0		0	0		0	0		0	0		0	0		0
LA160	9	1	0		0	0		0	2		2	0		0	0		0	0		0	0		0	0		0	0		0	0		0	0		0	0		0
LA161	8	1	0		0	0		0	0		0	0		0	0		0	0		0
LA162	8	1	0		0	0		0	4		4	0		0	0		0	2		2
LA163	9	1	0		0	0		0	0		0	0		0	0		0	0		0
LA164	9	1	0		0	0		0	0		0	0		0	0		0	0		0
LA165	9	2	0		0	0		0	0		0	0		0	0		0	0		0
LA166	9	1	0		0	0		0	0		0	0		0	0		0	0		0
LA167	7	1	0		0	0		0	16		16	0		0	0		0	6		6
LA168	9	1	0		0	0		0	0		0	0		0	0		0	0		0
LA169	7	2	0		0	0		0	0		0	0		0	0		0	0		0
LA170	8	2	0		0	0		0	16		16	0		0	0		0	9		9	0		0	0		0	0		0	0		0	0		0	0		0
LA171	8	2	0		0	0		0	0		0	0		0	0		0	0		0
LA172	8	1	0		0	0		0	0		0	0		0	0		0	0		0
LA173	11	2	0		0	0		0	8		8	0		0	0		0	8		8	0		0	0		0	2		2	0		0	0		0	2		2
LA174	11	1	0		0	0		0	1		1	0		0	0		0	3		3	0		0	0		0	0		0	0		0	0		0	0		0
LA175	14	2	0		0	0		0	0		0	0		0	0		0	0		0	0		0	0		0	0		0	0		0	0		0	0		0
LA176	12	2	0		0	0		0	6		6	0		0	0		0	1		1	0		0	0		0	0		0	0		0	0		0	0		0
LA177	12	1	0		0	0		0	0		0	0		0	0		0	0		0
LA178	13	2	0		0	0		0	5		5	0		0	0		0	6		6	0		0	0		0	0		0	0		0	0		0	0		0
LA179	14	2	9		9	0		0	97		97	8		8	0		0	56		56	0		0	0		0	77		77	0		0	0		0	60		60
LA180	12	2	0		0	0		0	0		0	0		0	0		0	0		0
LA181	11	2	0		0	0		0	0		0	0		0	0		0	0		0	0		0	0		0	1		1	0		0	0		0	1		1
LA182	14	2	0	0	0	0	0	0	28	32	28	0	0	0	0	0	0	27	26	27	0	0	0	0	0	0	0	0	0	0	0	0	0	0	0	0	0	0
LA183	13	2	0		0	0		0	36		36	0		0	0		0	32		32	0		0	0		0	27		27	0		0	0		0	34		34
LA184	14	1	0		0	0		0	5		5	0		0	0		0	4		4	0		0	0		0	0		0	0		0	0		0	0		0
LA185	13	2	0		0	0		0	0		0	0		0	0		0	0		0	0		0	0		0	0		0	0		0	0		0	0		0
LA186	13	2	0		0	0		0	0		0	0		0	0		0	0		0	0		0	0		0	0		0	0		0	0		0	0		0
LA187	14	1	0		0	0		0	2		2	0		0	0		0	1		1	0		0	0		0	1		1	0		0	0		0	3		3
LA188	14	1	0		0	0		0	0		0	0		0	0		0	0		0
LA189	14	1	0	0	0	0	0	0	4	2	4	0	0	0	0	0	0	3	3	3	0	0	0	0	0	0	4	3	4	0	0	0	0	0	0	3	3	3
LA190	14	1	0		0	0		0	1		1	0		0	0		0	1		1	0		0	0		0	0		0	0		0	0		0	0		0
LA191	10	2	0		0	0		0	0		0	0		0	0		0	0		0
LA192	10	1	0		0	0		0	0		0	0		0	0		0	0		0
LA193	10	1	0		0	0		0	0		0	0		0	0		0	0		0	0		0	0		0	0		0	0		0	0		0	0		0
LA194	10	1	0		0	0		0	0		0	0		0	0		0	0		0
LA195	10	1	0		0	0		0	8		8	0		0	0		0	7		7	0		0	0		0	0		0	0		0	0		0	0		0
LA196	9	1	0		0	0		0	0		0	0		0	0		0	0		0
LA197	8	2	0		0	0		0	0		0	0		0	0		0	0		0
LA198	10	2	0		0	0		0	0		0	0		0	0		0	0		0
LA199	13	2	0		0	1		1	0		0	0		0	0		0	0		0	0		0	0		0	0		0	0		0	0		0	0		0
LA200	12	2	0		0	21		21	89		89	0		0	8		8	74		74	0		0	2		2	0		0	0		0	2		2	0		0
LA201	13	2	1212		1212	0		0	0		0	1203		1203	8		8	1		1	0		0	0		0	0		0	0		0	0		0	0		0
LA202	13	2	22		22	0		0	0		0	16		16	0		0	0		0	0		0	0		0	0		0	0		0	0		0	0		0
LA203	13	2	0		0	0		0	2		2	0		0	0		0	3		3	0		0	0		0	0		0	0		0	0		0	0		0
LA204	13	2	1705		1705	0		0	30		30	2420		2420	0		0	16		16	0		0	0		0	0		0	0		0	0		0	0		0
LA205	13	2	4592		4592	78		78	655		655	3755		3755	63		63	504		504
LA206	14	2	1186		1186	12		12	25		25	1186		1186	25		25	32		32	0		0	0		0	0		0	0		0	0		0	0		0
LA207	14	2	8		8	0		0	3		3	3		3	0		0	11		11	0		0	0		0	0		0	0		0	0		0	0		0
LA208	13	2	0		0	0		0	104		104	0		0	0		0	114		114	0		0	0		0	6		6	0		0	0		0	5		5
LA209	12	2	0		0	0		0	0		0	0		0	0		0	0		0
LA210	12	2	1999		1999	4		4	65		65	2215		2215	0		0	36		36	0		0	4		4	0		0	1		1	1		1	0		0
LA211	13	2	0		0	0		0	45		45	0		0	0		0	8		8	0		0	0		0	8		8	0		0	0		0	10		10
LA212	13	2	0		0	0		0	0		0	0		0	0		0	1		1	0		0	0		0	0		0	0		0	0		0	0		0
LA213	11	2	0		0	0		0	0		0	0		0	0		0	0		0
LA214	12	2	198		198	0		0	48		48	192		192	0		0	45		45	0		0	0		0	0		0	0		0	0		0	0		0
LA215	13	1	3798		3798	0		0	138		138	3798		3798	3		3	145		145	0		0	0		0	17		17	0		0	0		0	6		6
LA216	12	1	0		0	0		0	98		98	0		0	0		0	89		89	0		0	0		0	0		0	0		0	0		0	0		0
LA217	12	1	69		69	0		0	7		7	58		58	0		0	4		4	0		0	0		0	0		0	0		0	0		0	0		0
LA218	13	1	0		0	111		111	32		32	0		0	150		150	39		39
LA219	11	2	0		0	1		1	132		132	0		0	3		3	134		134	0		0	0		0	0		0	0		0	0		0	0		0
LA220	13	1	0		0	0		0	12		12	0		0	0		0	31		31	0		0	0		0	2		2	0		0	0		0	1		1
LA221	12	1	1865		1865	6		6	8		8	1865		1865	17		17	12		12	0		0	9		9	0		0	0		0	2		2	0		0
LA222	12	1	0		0	0		0	50		50	0		0	0		0	44		44
LA223	12	1	0		0	0		0	0		0	0		0	0		0	0		0
LA224	12	1	0		0	29		29	102		102	0		0	29		29	113		113	0		0	7		7	0		0	0		0	9		9	0		0
LA225	13	1	0		0	0		0	19		19	0		0	0		0	14		14	0		0	0		0	0		0	0		0	0		0	0		0
LA226	12	2	0		0	0		0	0		0	0		0	0		0	0		0
LA227	-1	-1	-1		-1	-1		-1	-1		-1	-1		-1	-1		-1	-1		-1
LA228	-1	-1	-1		-1	-1		-1	-1		-1	-1		-1	-1		-1	-1		-1
LA229	14	2	90		90	0		0	9		9	94		94	0		0	11		11	0		0	0		0	0		0	0		0	0		0	0		0
LA230	11	1	0		0	0		0	6		6	0		0	0		0	5		5	0		0	0		0	0		0	0		0	0		0	0		0
LA231	14	1	0		0	0		0	36		36	0		0	0		0	18		18
LA232	13	1	89		89	0		0	42		42	86		86	0		0	38		38
LA233	11	1	0		0	12		12	944		944	0		0	16		16	899		899	0		0	1		1	3		3	0		0	2		2	2		2
LA234	12	2	0		0	0		0	0		0	0		0	0		0	0		0
LA235	13	2	0		0	0		0	9		9	0		0	0		0	13		13	0		0	0		0	0		0	0		0	0		0	0		0
LA236	12	2	0		0	0		0	9		9	0		0	0		0	14		14	0		0	0		0	0		0	0		0	0		0	0		0
LA237	11	2	0		0	0		0	50		50	0		0	0		0	74		74	0		0	0		0	0		0	0		0	0		0	0		0
LA238	13	2	0		0	0		0	19		19	0		0	0		0	25		25	0		0	0		0	0		0	0		0	0		0	0		0
LA239	12	2	321		321	0		0	30		30	163		163	0		0	20		20	0		0	0		0	0		0	0		0	0		0	0		0
LA240	11	1	2		2	0		0	9		9	0		0	0		0	5		5	0		0	0		0	0		0	0		0	0		0	0		0
LA241	12	2	8		8	0		0	56		56	10		10	0		0	65		65	0		0	0		0	0		0	0		0	0		0	0		0
LA242	11	2	0		0	0		0	10		10	0		0	0		0	22		22	0		0	0		0	0		0	0		0	0		0	0		0
LA243	13	2	0		0	4		4	12		12	0		0	2		2	11		11	0		0	3		3	0		0	0		0	5		5	0		0
LA244	13	2	122		122	3		3	11		11	130		130	17		17	14		14	0		0	1		1	0		0	0		0	1		1	0		0
LA245	11	2	3781		3781	0		0	83		83	3781		3781	5		5	80		80	0		0	2		2	0		0	0		0	2		2	0		0
LA246	12	2	0		0	0		0	0		0	0		0	0		0	0		0
LA247	11	2	0		0	0		0	13		13	0		0	0		0	4		4	0		0	0		0	0		0	0		0	0		0	0		0
LA248	12	2	0		0	1		1	79		79	0		0	6		6	136		136	0		0	1		1	38		38	0		0	1		1	8		8
LA249	12	2	0		0	0		0	192		192	0		0	0		0	170		170	0		0	0		0	2		2	0		0	0		0	1		1
LA250	12	1	0		0	5		5	30		30	0		0	1		1	12		12	0		0	0		0	3		3	0		0	1		1	1		1
LA251	12	1	0		0	9		9	161		161	0		0	3		3	47		47	0		0	0		0	0		0	0		0	1		1	0		0
LA252	13	1	0		0	0		0	101		101	0		0	0		0	121		121	0		0	0		0	0		0	0		0	0		0	0		0
LA253	12	1	0		0	0		0	23		23	0		0	0		0	9		9	0		0	0		0	3		3	0		0	0		0	2		2
LA254	13	1	84		84	0		0	92		92	53		53	0		0	129		129	0		0	0		0	54		54	0		0	0		0	40		40
LA255	14	1	0		0	0		0	39		39	0		0	0		0	49		49	0		0	0		0	0		0	0		0	0		0	0		0
LA256	12	1	0		0	2		2	1		1	0		0	2		2	3		3	0		0	1		1	0		0	0		0	1		1	0		0
LA257	13	1	0		0	51		51	30		30	0		0	9		9	12		12	0		0	34		34	16		16	0		0	31		31	13		13
LA258	13	1	0		0	9		9	101		101	0		0	5		5	74		74	0		0	4		4	2		2	0		0	3		3	0		0
LA259	12	1	44	45	44	0	0	0	34	25	34	80	75	80	0	0	0	45	40	45	0	0	0	0	0	0	0	0	0	0	0	0	0	0	0	0	0	0
LA260	13	1	13		13	11		11	56		56	12		12	4		4	94		94	0		0	12		12	30		30	0		0	3		3	52		52
LA261	11	1	0		0	0		0	274		274	0		0	0		0	253		253	0		0	0		0	2		2	0		0	0		0	1		1
LA262	11	1	0		0	0		0	0		0	0		0	0		0	0		0
LA263	12	2	0		0	21		21	67		67	0		0	19		19	60		60	0		0	10		10	3		3	0		0	17		17	6		6
LA264	11	1	0		0	2		2	1716		1716	0		0	11		11	1729		1729	0		0	5		5	17		17	0		0	6		6	13		13
LA265	14	1	0		0	0		0	50		50	0		0	0		0	30		30	0		0	0		0	0		0	0		0	0		0	0		0
LA266	12	1	1063		1063	0		0	371		371	1564		1564	0		0	367		367	0		0	0		0	0		0	0		0	0		0	0		0
LA267	11	2	0		0	0		0	27		27	0		0	1		1	31		31	0		0	0		0	0		0	0		0	0		0	0		0
LA268	11	1	0		0	0		0	2		2	0		0	0		0	5		5	0		0	0		0	0		0	0		0	0		0	0		0
LA269	14	2	279		279	0		0	70		70	248		248	0		0	61		61	0		0	0		0	2		2	0		0	0		0	1		1
LA270	12	1	8	8	8	0	0	0	1	2	1	3	2	3	0	0	0	1	1	1	0	0	0	0	0	0	0	0	0	0	0	0	0	0	0	0	0	0
LA271	13	2	0		0	0		0	157		157	0		0	0		0	134		134	0		0	0		0	0		0	0		0	0		0	0		0
LA272	14	2	0		0	0		0	56		56	0		0	0		0	89		89	0		0	0		0	0		0	0		0	0		0	0		0
LA273	14	2	0		0	53		53	0		0	0		0	55		55	0		0	0		0	77		77	0		0	0		0	65		65	0		0
LA274	12	1	0		0	0		0	137		137	0		0	2		2	181		181	0		0	0		0	0		0	0		0	0		0	0		0
LA275	12	1	1781		1781	34		34	43		43	1781		1781	27		27	31		31	0		0	12		12	0		0	0		0	8		8	0		0
LA276	11	2	0		0	0		0	8		8	0		0	0		0	5		5	0		0	0		0	0		0	0		0	0		0	0		0
LA277	12	1	0		0	0		0	6		6	0		0	0		0	6		6	0		0	0		0	0		0	0		0	0		0	0		0
LA278	12	2	0		0	0		0	48		48	0		0	0		0	15		15	0		0	0		0	0		0	0		0	0		0	0		0
LA279	14	2	113		113	14		14	6		6	125		125	17		17	4		4	0		0	3		3	1		1	0		0	4		4	2		2
LA280	14	2	0		0	0		0	0		0	0		0	0		0	0		0
LA281	12	1	0		0	0		0	0		0	0		0	0		0	0		0
LA282	12	1	4		4	0		0	38		38	4		4	0		0	35		35	0		0	0		0	0		0	0		0	0		0	0		0
LA283	13	1	0		0	7		7	248		248	5		5	2		2	315		315	0		0	1		1	0		0	0		0	1		1	0		0
LA284	11	1	0		0	0		0	9		9	0		0	0		0	8		8	0		0	0		0	0		0	0		0	0		0	0		0
LA285	13	2	0	0	0	3	3	3	89	91	89	0	0	0	4	3	4	128	98	128	0	0	0	4	6	4	5	4	5	0	0	0	5	11	5	7	10	7
LA286	11	2	0		0	0		0	6		6	0		0	0		0	6		6	0		0	0		0	0		0	0		0	0		0	0		0
LA287	12	1	2119		2119	8		8	1445		1445	2119		2119	4		4	1445		1445	0		0	0		0	0		0	0		0	1		1	0		0
LA288			5		5	7		7	3		3	7		7	4		4	2		2
LA289	13	2	0		0	0		0	19		19	0		0	0		0	17		17	0		0	0		0	0		0	0		0	0		0	0		0
LA290	13	1	0		0	7		7	225		225	0		0	6		6	171		171	0		0	0		0	0		0	0		0	3		3	0		0
LA291	14	1	179		179	1		1	58		58	192		192	1		1	34		34	0		0	5		5	0		0	0		0	11		11	0		0
LA292	12	2	0	0	0	0	0	0	0	0	0	0	0	0	0	0	0	0	0	0	0	0	0	0	0	0	0	0	0	0	0	0	0	0	0	0	0	0
LA293	13	1	0		0	0		0	42		42	0		0	0		0	60		60	0		0	0		0	0		0	0		0	0		0	0		0
LA294	14	2	0		0	0		0	294		294	0		0	0		0	96		96	0		0	0		0	0		0	0		0	0		0	1		1
LA295	12	1	2516		2516	6		6	9		9	2516		2516	5		5	33		33	0		0	0		0	1		1	0		0	0		0	1		1
LA296	12	1	1806		1806	10		10	45		45	1806		1806	39		39	55		55	0		0	8		8	0		0	0		0	11		11	0		0
LA297	12	1	0		0	0		0	4		4	0		0	0		0	4		4	0		0	0		0	2		2	0		0	0		0	1		1
LA298	12	1	34		34	2		2	83		83	24		24	3		3	77		77	0		0	2		2	0		0	0		0	1		1	0		0
LA299	12	1	0		0	0		0	0		0	0		0	0		0	0		0
LA300	14	1	0		0	1		1	133		133	0		0	1		1	101		101	0		0	3		3	0		0	0		0	1		1	0		0
LA301	12	2	6500		6500	48		48	12		12	6500		6500	25		25	27		27	10		10	119		119	0		0	4		4	92		92	0		0
LA302	14	2	0		0	3		3	23		23	0		0	2		2	30		30	0		0	4		4	5		5	0		0	7		7	6		6
LA303	13	2	222		222	0		0	236		236	146		146	0		0	157		157	0		0	0		0	0		0	0		0	0		0	0		0
LA304	14	2	54		54	1		1	156		156	58		58	2		2	200		200	0		0	2		2	10		10	0		0	1		1	2		2
LA305	13	2	26		26	0		0	234		234	20		20	0		0	239		239	0		0	0		0	0		0	0		0	0		0	0		0
LA306	11	2	0		0	5		5	0		0	0		0	1		1	0		0	0		0	9		9	0		0	0		0	4		4	0		0
LA307	11	1	0		0	6		6	15		15	0		0	7		7	16		16	0		0	14		14	0		0	0		0	10		10	0		0
LA308	13	1	0		0	0		0	7		7	0		0	1		1	2		2
LA309	13	1	0		0	0		0	0		0	0		0	0		0	0		0
LA310	12	2	593		593	197		197	23		23	650		650	143		143	47		47	0		0	54		54	0		0	0		0	20		20	0		0
LA311	11	1	0		0	11		11	25		25	0		0	13		13	20		20	0		0	3		3	0		0	0		0	0		0	0		0
LA312	11	1	0		0	0		0	4		4	0		0	0		0	2		2
LA313	11	1	0		0	0		0	0		0	0		0	0		0	0		0
LA314	13	1	0		0	0		0	0		0	0		0	0		0	0		0
LA315	13	2	0		0	0		0	13		13	0		0	0		0	4		4	0		0	0		0	0		0	0		0	0		0	0		0
LA316	13	2	76		76	0		0	7		7	58		58	0		0	7		7	0		0	0		0	0		0	0		0	0		0	0		0
LA317	13	1	0	0	0	0	0	0	35	31	35	0	0	0	0	0	0	19	20	19	0		0	0		0	0		0	0		0	0		0	0		0
LA318	13	1	0		0	7		7	143		143	0		0	7		7	133		133	0		0	3		3	0		0	0		0	2		2	0		0
LA319	14	1	134		134	11		11	42		42	170		170	21		21	71		71	0		0	1		1	1		1	0		0	0		0	2		2
LA320	14	1	0		0	0		0	7		7	0		0	0		0	6		6	0		0	0		0	0		0	0		0	0		0	0		0
LA321	13	1	0		0	17		17	110		110	0		0	35		35	423		423
LA322	13	1	628		628	25		25	210		210	624		624	38		38	172		172	0		0	0		0	0		0	0		0	1		1	0		0
LA323	13	1	0		0	0		0	153		153	0		0	0		0	166		166	0		0	0		0	0		0	0		0	0		0	0		0
LA324	12	2	0	0	0	0	0	0	0	0	0	0	0	0	0	0	0	0	0	0
LA325	13	2	0		0	0		0	3		3	0		0	0		0	2		2	86		86	0		0	9		9	13		13	0		0	24		24
LA326	12	2	0		0	0		0	32		32	0		0	0		0	35		35	0	0	0	0	0	0	0	0	0	0	0	0	1	1	1	0	0	0
LA327	14	2	0		0	0		0	227		227	0		0	0		0	201		201	0		0	0		0	0		0	0		0	0		0	0		0
LA328	13	2	0		0	0		0	64		64	0		0	0		0	60		60	0		0	0		0	0		0	0		0	0		0	0		0
LA329	13	2	0		0	0		0	1		1	0		0	0		0	2		2	0		0	0		0	0		0	0		0	0		0	0		0
LA330	12	2	0		0	0		0	0		0	0		0	0		0	0		0
LA331	13	2	0		0	0		0	0		0	0		0	0		0	0		0	0		0	0		0	0		0	0		0	0		0	0		0
LA332	14	2	92		92	0		0	190		190	68		68	0		0	160		160	0		0	0		0	0		0	0		0	0		0	0		0
LA333	13	1	67		67	0		0	45		45	169		169	0		0	41		41	0		0	0		0	0		0	0		0	0		0	0		0
LA334	13	1	0		0	5		5	0		0	0		0	5		5	0		0
LA335	13	2	0		0	0		0	12		12	0		0	0		0	36		36	0		0	0		0	0		0	0		0	0		0	0		0
LA336	13	1	0		0	0		0	0		0	0		0	0		0	0		0
LA337	12	1	0	0	0	0	0	0	11	5	11	0	0	0	0	0	0	14	10	14	0		0	0		0	0		0	0		0	0		0	0		0
LA338	14	1	0		0	0		0	14		14	0		0	0		0	13		13	0		0	0		0	0		0	0		0	0		0	0		0
LA339	11	1	0		0	0		0	0		0	0		0	0		0	0		0
LA340	14	1	0	0	0	0	0	0	134	130	134	0	0	0	0	0	0	114	110	114	0	0	0	0	0	0	0	0	0	0	0	0	0	0	0	0	0	0
LA341	13	2	0		0	10		10	11		11	0		0	6		6	6		6	0		0	8		8	15		15	0		0	16		16	22		22
LA342	12	2	157		157	0		0	41		41	163		163	0		0	47		47	0		0	0		0	22		22	0		0	0		0	19		19
LA343	13	1	0		0	0		0	40		40	0		0	0		0	20		20	0		0	0		0	4		4	0		0	0		0	10		10
LA344	14	1	0		0	20		20	120		120	0		0	14		14	126		126	0		0	1		1	1		1	0		0	1		1	1		1
LA345	11	2	0	0	0	0	0	0	0	0	0	0	0	0	0	0	0	0	0	0
LA346	13	2	290		290	28		28	0		0	315		315	32		32	0		0	0		0	5		5	0		0	0		0	2		2	0		0
LA347	12	1	0		0	0		0	10		10	0		0	0		0	6		6	0		0	0		0	0		0	0		0	0		0	0		0
LA348	13	1	35		35	1		1	25		25	18		18	1		1	20		20	0		0	2		2	0		0	0		0	1		1	0		0
LA349	14	1	0	0	0	0	0	0	262	258	262	0	0	0	0	0	0	229	225	229	0	0	0	0	0	0	0	0	0	0	0	0	0	0	0	0	0	0
LA350	14	1	47		47	12		12	189		189	16		16	9		9	159		159	0		0	1		1	0		0	0		0	2		2	0		0
LA351	13	2	0		0	0		0	23		23	0		0	0		0	16		16	0		0	0		0	0		0	0		0	0		0	0		0
LA352	12	1	0		0	0		0	720		720	0		0	0		0	648		648	0		0	0		0	0		0	0		0	0		0	0		0
LA353	11	1	0		0	0		0	0		0	0		0	0		0	0		0
LA354	14	1	0		0	0		0	0		0	0		0	0		0	0		0
LA355	14	1	0		0	0		0	3		3	0		0	0		0	2		2	0		0	0		0	0		0	0		0	0		0	0		0
LA356	14	2	0		0	8		8	614		614	0		0	8		8	478		478	0		0	0		0	0		0	0		0	0		0	0		0
LA357	14	1	0	0	0	0	0	0	0	0	0	0	0	0	0	0	0	0	0	0
LA358	14	2	0		0	0		0	864		864	0		0	0		0	1205		1205	0		0	0		0	0		0	0		0	0		0	0		0
LA359	14	2	43	39	43	0	0	0	1	1	1	37	37	37	0	0	0	3	2	3	0	0	0	0	0	0	0	0	0	0	0	0	0	0	0	0	0	0
LA360	14	2	1174		1174	7		7	76		76	888		888	4		4	54		54	0		0	1		1	5		5	0		0	1		1	8		8
LA361	14	2	10		10	7		7	27		27	10		10	3		3	22		22	0		0	13		13	15		15	0		0	7		7	2		2
LA362	13	2	0		0	0		0	0		0	0		0	0		0	0		0
LA363	13	1	359	255	359	0	0	0	113	112	113	238	248	238	0	0	0	136	134	136	0	0	0	0	0	0	4	4	4	0	0	0	0	0	0	7	6	7
LA364	14	1	152		152	6		6	106		106	221		221	3		3	137		137	0		0	1		1	0		0	0		0	1		1	0		0
LA365	14	1	245		245	6		6	97		97	295		295	5		5	121		121	0		0	2		2	12		12	0		0	4		4	7		7
LA366	13	2	0		0	9		9	49		49	0		0	3		3	15		15	0		0	0		0	0		0	0		0	1		1	0		0
LA367	13	1	0		0	0		0	5		5	0		0	0		0	4		4	0		0	0		0	0		0	0		0	0		0	0		0
LA368	14	1	0		0	1		1	128		128	0		0	3		3	85		85	0		0	3		3	0		0	0		0	2		2	0		0
LA369	14	1	0		0	0		0	54		54	0		0	0		0	26		26	0		0	0		0	0		0	0		0	0		0	0		0
LA370	14	1	0		0	0		0	5		5	0		0	0		0	4		4	0		0	1		1	0		0	0		0	1		1	0		0
LA371	14	1	2827		2827	4		4	431		431	2827		2827	8		8	493		493	0		0	3		3	0		0	0		0	1		1	0		0
LA372	14	2	172		172	11		11	6		6	207		207	12		12	4		4	0		0	8		8	0		0	0		0	4		4	0		0
LA373	14	1	0		0	0		0	0		0	0		0	0		0	0		0	0		0	0		0	0		0	0		0	0		0	0		0
LA374	14	1	0		0	0		0	0		0	0		0	0		0	0		0
LA375	11	2	0		0	0		0	0		0	0		0	0		0	0		0
LA376	13	1	35	33	35	6	8	6	49	47	49	28	25	28	2	2	2	39	30	39	0	0	0	18	20	18	3	4	3	0	0	0	22	20	22	4	4	4
LA377	13	2	0		0	0		0	0		0	0		0	0		0	0		0
LA378	14	2	0		0	1		1	0		0	0		0	1		1	0		0	0		0	0		0	0		0	0		0	0		0	0		0
LA379	13	1	0		0	0		0	5		5	0		0	0		0	9		9	0		0	0		0	0		0	0		0	0		0	0		0
LA380	14	2	0		0	0		0	0		0	0		0	0		0	0		0
LA381	14	2	0		0	3		3	398		398	0		0	6		6	476		476	0		0	15		15	116		116	0		0	9		9	113		113
LA382	11	1	0		0	4		4	10		10	0		0	2		2	7		7	0		0	41		41	0		0	0		0	35		35	0		0
LA383	14	1	0		0	0		0	477		477	0		0	0		0	423		423	0		0	0		0	14		14	0		0	0		0	12		12
LA384	13	1	0		0	0		0	62		62	0		0	1		1	46		46	0		0	1		1	4		4	0		0	7		7	9		9
LA385	13	2	0		0	0		0	5		5	0		0	0		0	3		3	0		0	0		0	0		0	0		0	0		0	0		0
LA386	14	2	0		0	0		0	4		4	0		0	0		0	5		5	0		0	0		0	5		5	0		0	0		0	6		6
LA387	13	1	0		0	0		0	8		8	0		0	0		0	9		9	0		0	3		3	0		0	0		0	3		3	0		0
LA388	14	1	0		0	0		0	9		9	0		0	0		0	8		8	0		0	0		0	0		0	0		0	0		0	0		0
LA389	11	2	2354	2390	2354	13	14	13	78	74	78	2354	2390	2354	38	32	38	68	65	68	0	0	0	1	1	1	0	0	0	0	0	0	2	2	2	0	0	0
LA390	12	1	271		271	4		4	61		61	273		273	3		3	69		69	0		0	0		0	0		0	0		0	0		0	0		0
LA391	11	2	0		0	0		0	25		25	0		0	0		0	31		31	0		0	0		0	0		0	0		0	0		0	0		0
LA392	13	1	226		226	0		0	35		35	199		199	0		0	27		27	0		0	0		0	0		0	0		0	0		0	0		0
LA393	12	1	0		0	0		0	7		7	0		0	0		0	5		5	0		0	0		0	0		0	0		0	0		0	0		0
LA394	11	2	0		0	0		0	14		14	0		0	0		0	21		21	0		0	0		0	0		0	0		0	0		0	0		0
LA395	14	2	0		0	4		4	52		52	0		0	2		2	49		49	0		0	9		9	5		5	0		0	4		4	7		7
LA396	14	1	0		0	0		0	163		163	0		0	0		0	120		120	0		0	0		0	0		0	0		0	0		0	0		0
LA397	11	2	0	0	0	6	5	6	166	117	166	0	0	0	4	4	4	170	168	170	0		0	9		9	2		2	0		0	10		10	3		3
LA398	14	1	0		0	1		1	332		332	0		0	2		2	244		244	0		0	0		0	26		26	0		0	0		0	24		24
LA399	14	1	0		0	0		0	30		30	0		0	0		0	17		17	0		0	0		0	0		0	0		0	0		0	0		0
LA400	6	2	585		585	0		0	4		4	366		366	0		0	2		2	293		293	0		0	0		0	275		275	0		0	0		0
LA401	6	2	585		585	0		0	4		4	656		656	0		0	5		5	1		1	0		0	0		0	0		0	0		0	0		0
LA402	6	1	220		220	0		0	0		0	542		542	0		0	0		0	0		0	0		0	0		0	0		0	0		0	0		0
LA403	6	1	97		97	0		0	0		0	58		58	0		0	0		0	0		0	0		0	0		0	0		0	0		0	0		0
LA404	6	1	9		9	0		0	10		10	15		15	0		0	14		14	0	0	0	0	0	0	2	2	2	0	0	0	0	0	0	4	4	4
LA405	7	2	234		234	0		0	31		31	512		512	0		0	54		54	0		0	0		0	0		0	0		0	0		0	0		0
LA406	7	2	33		33	0		0	0		0	46		46	0		0	0		0	0		0	0		0	0		0	0		0	0		0	0		0
LA407	7	2	2118		2118	3		3	3		3	2118		2118	3		3	6		6	1		1	0		0	0		0	10		10	2		2	0		0
LA408	8	1	112		112	0		0	0		0	122		122	0		0	0		0	0		0	0		0	0		0	0		0	0		0	0		0
LA409	7	1	23		23	0		0	24		24	35		35	0		0	20		20	0		0	0		0	4		4	0		0	0		0	2		2
LA410	8	1	390		390	0		0	0		0	642		642	0		0	0		0	0		0	0		0	0		0	0		0	0		0	0		0
LA411	8	1	11		11	0		0	6		6	60		60	0		0	13		13	0		0	0		0	2		2	0		0	0		0	1		1
LA412	7	1	206		206	0		0	0		0	259		259	0		0	0		0	0		0	0		0	1		1	0		0	0		0	4		4
LA413	8	2	10		10	0		0	0		0	29		29	0		0	0		0	0		0	0		0	0		0	0		0	0		0	0		0
LA414	8	2	105		105	0		0	2		2	77		77	0		0	1		1	0		0	0		0	0		0	0		0	0		0	0		0
LA415	9	2	247		247	0		0	0		0	286		286	0		0	0		0	0		0	0		0	0		0	0		0	0		0	0		0
LA416	8	1	469		469	0		0	0		0	96		96	0		0	0		0	0		0	0		0	0		0	0		0	0		0	0		0
LA417	8	1	53		53	0		0	5		5	65		65	0		0	16		16	0		0	0		0	1		1	0		0	0		0	0		0
LA418	9	1	57		57	0		0	13		13	49		49	0		0	8		8	0		0	0		0	0		0	0		0	0		0	0		0
LA419	8	1	35		35	0		0	1		1	47		47	0		0	0		0	0		0	0		0	0		0	0		0	0		0	0		0
LA420	9	2	28		28	0		0	0		0	39		39	0		0	0		0	0		0	0		0	0		0	0		0	0		0	0		0
LA421	9	2	0		0	0		0	0		0	0		0	0		0	0		0
LA422	9	2	42		42	0		0	1		1	21		21	0		0	0		0	0	0	0	0	0	0	0	0	0	0	0	0	0	0	0	0	0	0
LA423	9	2	37		37	0		0	0		0	18		18	0		0	0		0	0		0	0		0	0		0	0		0	0		0	0		0
LA424	9	1	1358		1358	0		0	4		4	1358		1358	0		0	20		20	14		14	0		0	0		0	26		26	0		0	0		0
LA425	9	1	650		650	0		0	10		10	730		730	0		0	12		12	0		0	0		0	2		2	0		0	0		0	2		2
LA426	9	1	583		583	0		0	0		0	763		763	0		0	0		0	0		0	0		0	0		0	1		1	0		0	0		0
LA427	10	1	152		152	0		0	6		6	280		280	0		0	6		6	0		0	0		0	4		4	0		0	0		0	3		3
LA428	9	1	306		306	0		0	38		38	349		349	0		0	26		26	0		0	0		0	0		0	0		0	0		0	0		0
LA429	10	1	118		118	0		0	0		0	79		79	0		0	0		0	0		0	0		0	0		0	0		0	0		0	0		0
LA430	10	2	171		171	0		0	0		0	119		119	0		0	0		0	143		143	0		0	1		1	136		136	0		0	1		1
LA431	7	2	0		0	1		1	6		6	0		0	2		2	3		3	0		0	0		0	0		0	0		0	0		0	0		0
LA432	7	2	0		0	3		3	2		2	0		0	1		1	5		5	0		0	0		0	0		0	0		0	0		0	1		1
LA433	13	1	0		0	0		0	46		46	0		0	0		0	43		43	0		0	0		0	13		13	0		0	0		0	24		24
LA434	12	1	0		0	6		6	52		52	0		0	4		4	57		57	0		0	5		5	0		0	0		0	1		1	0		0
LA435	14	2	0	0	0	0	0	0	136	134	136	0	0	0	0	0	0	116	120	116	0	0	0	0	0	0	1	1	1	0	0	0	0	0	0	1	2	1
LA436	11	2	0		0	57		57	130		130	0		0	120		120	158		158	0		0	23		23	0		0	0		0	26		26	0		0
LA437	6	1	135	137	135	0	0	0	0	0	0	217	220	217	0	0	0	0	0	0	27	29	27	0	0	0	0	0	0	24	25	24	0	0	0	0	0	0
LA438	8	2	657		657	0		0	0		0	519		519	0		0	0		0	0		0	0		0	0		0	0		0	0		0	0		0
LA439	7	1	0		0	6		6	29		29	0		0	6		6	16		16	0		0	3		3	5		5	0		0	3		3	6		6
LA440	6	1	18		18	0		0	0		0	48		48	0		0	0		0	0		0	0		0	0		0	0		0	0		0	0		0
LA441	6	1	6	6	6	0	0	0	3	3	3	3	3	3	0	0	0	5	6	5	0	0	0	0	0	0	0	0	0	0	0	0	0	0	0	0	0	0
LA442	14	1	0		0	9		9	126		126	0		0	4		4	41		41	0		0	0		0	0		0	0		0	0		0	0		0
LA443	13	2	0		0	3		3	0		0	0		0	0		0	0		0	0		0	0		0	0		0	0		0	1		1	0		0
LA444	11	2	0		0	2		2	7		7	0		0	1		1	2		2	0		0	0		0	0		0	0		0	0		0	0		0
LA445	14	1	0		0	1		1	7		7	0		0	2		2	10		10	0		0	0		0	3		3	0		0	2		2	2		2
LA446	14	1	19	22	19	0	0	0	71	70	71	23	23	23	0	0	0	65	66	65	0	0	0	0	0	0	3	6	3	0	0	0	0	0	0	2	4	2
LA447	14	1	0		0	0		0	1		1	0		0	0		0	3		3	0		0	0		0	0		0	0		0	0		0	0		0
LA448	10	2	2260		2260	12		12	49		49	2260		2260	13		13	62		62	0		0	1		1	5		5	0		0	2		2	6		6
LA449	8	1	0	0	0	3	2	3	90	88	90	0	0	0	2	2	2	72	69	72	0	0	0	2	2	2	2	6	2	0	0	0	1	1	1	3	3	3
LA450	10	1	97		97	0		0	16		16	52		52	0		0	18		18	0		0	0		0	0		0	0		0	0		0	0		0
LA451	9	1	12		12	2		2	19		19	4		4	6		6	15		15	0		0	1		1	0		0	0		0	1		1	0		0
LA452	13	1	0		0	0		0	42		42	0		0	0		0	44		44	0		0	0		0	0		0	0		0	0		0	0		0
LA453	7	2	0		0	15		15	0		0	0		0	11		11	0		0	0		0	1		1	0		0	0		0	1		1	0		0
LA454	7	2	345		345	12		12	17		17	309		309	21		21	26		26	0		0	4		4	0		0	0		0	2		2	0		0
LA455	8	1	0		0	9		9	21		21	0		0	3		3	28		28	0		0	0		0	0		0	0		0	0		0	0		0
LA456	7	1	0		0	45		45	71		71	0		0	27		27	68		68	0	0	0	4	4	4	0	0	0	0	0	0	3	3	3	0	0	0
LA457	14	2	0		0	4		4	131		131	0		0	5		5	229		229	0		0	0		0	0		0	0		0	0		0	0		0
LA458	14	1	0		0	0		0	6		6	0		0	0		0	6		6
LA459	11	2	0		0	0		0	2		2	0		0	0		0	3		3	0		0	0		0	0		0	0		0	0		0	0		0
LA460	12	2	0		0	0		0	20		20	0		0	0		0	9		9	0		0	0		0	1		1	0		0	0		0	1		1
LA461	14	2	0		0	0		0	2		2	0		0	0		0	1		1	0		0	0		0	0		0	0		0	0		0	0		0
LA462	14	2	0		0	0		0	2		2	0		0	0		0	1		1	0		0	0		0	0		0	0		0	0		0	0		0
LA463	14	1	0		0	0		0	1		1	0		0	0		0	1		1	0		0	0		0	0		0	0		0	0		0	0		0
LA464	14	1	0		0	0		0	39		39	0		0	0		0	43		43	0		0	0		0	0		0	0		0	0		0	3		3
LA465	13	2	0		0	0		0	61		61	0		0	0		0	50		50	0		0	0		0	0		0	0		0	0		0	0		0
LA466	12	2	0		0	0		0	38		38	0		0	0		0	20		20	0		0	0		0	0		0	0		0	0		0	0		0
LA467	10	1	0		0	1		1	0		0	0		0	2		2	0		0	0		0	0		0	0		0	0		0	0		0	0		0
LA468	7	1	0	0	0	1	1	1	0	0	0	0	0	0	1	1	1	0	0	0	0		0	0		0	0		0	0		0	0		0	0		0
LA469	13	2	0		0	3		3	77		77	0		0	7		7	200		200	0		0	0		0	0		0	0		0	1		1	0		0
			469	32	469	469	32	469	469	32	469	469	32	469	469	32	469	469	32	469	303	22	303	303	22	303	303	22	303	303	22	303	303	22	303	303	22	303
		SWISS		1			0			1			0			0			1			0			0			0			0			0			0
		WHO		2			0			3			0			0			3			0			0			0			0			1			0

## Sheet: LAO_ERR
dKK	BL_AS	FU_AS	BL_TT	FU_TT	BL_HW	FU_HW		BL_AS	FU_AS	BL_TT	FU_TT	BL_HW	FU_HW
	13000	14	824	284	3445	30		13000	14	824	284	3445	30
	11358	0	340	74	2890	0		11358	0	340	74	2890	0
	7596	0	177	49	2069	0		7596	0	177	49	2069	0
	7562	0	108	142	1843	5		7562	0	108	142	1843	5
	5654	0	76	279	1368	0		5654	0	76	279	1368	0
	5032	0	73	211	1092	0		5032	0	73	211	1092	0
	4708	0	72	7	924	0		4708	0	72	7	924	0
	4520	0	69	102	900	26		4520	0	69	102	900	26
	4238	0	63	1	874	229		4238	0	63	1	874	229
	4236	11	61	20	851	0		4236	11	61	20	851	0
	4214	1	60	65	738	0		4214	1	60	65	738	0
	4125	0	60	7	576	50		4125	0	60	7	576	50
	3730	0	58	16	563	0		3730	0	58	16	563	0
	3612	0	51	3	527	3		3612	0	51	3	527	3
	3562	0	49	19	491	0		3562	0	49	19	491	0
	2716	40	46	0	473	0		2716	40	46	0	473	0
	2627	0	40	27	428	0		2627	0	40	27	428	0
	2415	0	37	2	396	0		2415	0	37	2	396	0
	2372	0	37	0	393	0		2372	0	37	0	393	0
	2062	0	34	2	390	1		2062	0	34	2	390	1
	1380	0	33	6	382	0		1380	0	33	6	382	0
	1346	1	32	49	371	0		1346	1	32	49	371	0
	1252	0	32	1	362	3		1252	0	32	1	362	3
	1243	0	31	7	360	0		1243	0	31	7	360	0
	1241	1	29	4	356	12		1241	1	29	4	356	12
	1176	0	28	3	350	0		1176	0	28	3	350	0
	1032	0	26	2	350	0		1032	0	26	2	350	0
	951	568	25	3	348	0		951	568	25	3	348	0
	762	0	24	3	336	5		762	0	24	3	336	5
	746	0	23	11	319	0		746	0	23	11	319	0
	655	0	23	12	318	0		655	0	23	12	318	0
	654	0	22	13	291	0		654	0	22	13	291	0
	605	0	21	3	288	0		605	0	21	3	288	0
	597	0	20	2	283	23		597	0	20	2	283	23
	565	0	16	24	283	0		565	0	16	24	283	0
	544	0	16	0	277	0		544	0	16	0	277	0
	540	0	15	39	276	0		540	0	15	39	276	0
	533	0	15	15	266	0		533	0	15	15	266	0
	527	0	14	7	252	2		527	0	14	7	252	2
	484	0	14	5	249	11		484	0	14	5	249	11
	465	0	13	3	248	0		465	0	13	3	248	0
	432	0	13	11	246	2		432	0	13	11	246	2
	425	0	13	3	243	0		425	0	13	3	243	0
	390	0	13	24	234	0		390	0	13	24	234	0
	389	0	13	0	222	0		389	0	13	0	222	0
	379	0	12	1	221	94		379	0	12	1	221	94
	373	0	12	1	218	11		373	0	12	1	218	11
	371	0	12	1	218	19		371	0	12	1	218	19
	368	0	12	4	217	12		368	0	12	4	217	12
	352	51	12	6	215	0		352	51	12	6	215	0
	320	0	12	0	215	46		320	0	12	0	215	46
	304	0	11	0	214	2		304	0	11	0	214	2
	290	279	11	2	213	0		290	279	11	2	213	0
	252	0	11	6	208	0		252	0	11	6	208	0
	238	0	10	20	187	0		238	0	10	20	187	0
	236	0	10	19	178	0		236	0	10	19	178	0
	234	0	10	6	175	32		234	0	10	6	175	32
	197	0	10	1	175	2		197	0	10	1	175	2
	184	0	9	2	167	0		184	0	9	2	167	0
	182	0	9	2	163	0		182	0	9	2	163	0
	160	0	9	24	163	0		160	0	9	24	163	0
	155	0	9	0	162	5		155	0	9	0	162	5
	149	0	8	0	160	0		149	0	8	0	160	0
	137	0	8	40	153	137		137	0	8	40	153	137
	134	0	8	2	150	82		134	0	8	2	150	82
	127	0	7	2	146	0		127	0	7	2	146	0
	124	0	7	9	145	0		124	0	7	9	145	0
	118	0	7	0	140	6		118	0	7	0	140	6
	113	0	6	2	139	0		113	0	6	2	139	0
	112	0	6	2	136	5		112	0	6	2	136	5
	106	0	6	8	131	3		106	0	6	8	131	3
	91	0	6	1	130	13		91	0	6	1	130	13
	82	0	6	13	130	0		82	0	6	13	130	0
	80	0	6	76	127	9		80	0	6	76	127	9
	79	0	6	13	125	94		79	0	6	13	125	94
	71	0	5	3	124	0		71	0	5	3	124	0
	67	0	5	4	124	0		67	0	5	4	124	0
	66	0	5	3	121	0		66	0	5	3	121	0
	63	0	5	11	113	3		63	0	5	11	113	3
	63	0	5	3	111	11		63	0	5	3	111	11
	63	0	4	2	111	0		63	0	4	2	111	0
	58	0	4	5	109	0		58	0	4	5	109	0
	58	0	4	0	108	13		58	0	4	0	108	13
	55	0	4	2	104	0		55	0	4	2	104	0
	54	0	4	5	102	0		54	0	4	5	102	0
	53	0	4	0	101	0		53	0	4	0	101	0
	46	0	3	0	101	12		46	0	3	0	101	12
	42	0	3	3	100	0		42	0	3	3	100	0
	39	0	3	0	99	5		39	0	3	0	99	5
	38	0	3	0	99	0		38	0	3	0	99	0
	35	0	3	1	93	0		35	0	3	1	93	0
	27	0	3	0	92	0		27	0	3	0	92	0
	25	0	3	2	89	37		25	0	3	2	89	37
	24	0	3	0	88	0		24	0	3	0	88	0
	20	0	2	12	88	41		20	0	2	12	88	41
	18	0	2	0	88	7		18	0	2	0	88	7
	17	0	2	0	86	0		17	0	2	0	86	0
	16	0	2	16	86	0		16	0	2	16	86	0
	11	0	2	4	85	3		11	0	2	4	85	3
	11	0	2	3	85	0		11	0	2	3	85	0
	9	0	2	0	82	3		9	0	2	0	82	3
	8	0	2	0	80	0		8	0	2	0	80	0
	5	0	1	0	80	0		5	0	1	0	80	0
	2	0	1	3	79	0		2	0	1	3	79	0
			1	0	74	0				1	0	74	0
			1	0	73	0				1	0	73	0
			1	8	70	0				1	8	70	0
					68	61						68	61
					67	0						67	0
					64	0						64	0
					64	0						64	0
					63	0						63	0
					62	0						62	0
					60	14						60	14
					58	0						58	0
					58	0						58	0
					57	0						57	0
					56	0						56	0
					56	0						56	0
					55	0						55	0
					54	0						54	0
					53	18						53	18
					53	11						53	11
					50	0						50	0
					49	17						49	17
					49	0						49	0
					48	0						48	0
					47	0						47	0
					46	0						46	0
					45	0						45	0
					45	0						45	0
					45	11						45	11
					44	0						44	0
					44	6						44	6
					43	3						43	3
					43	0						43	0
					42	4						42	4
					42	29						42	29
					42	2						42	2
					41	0						41	0
					39	0						39	0
					39	0						39	0
					36	0						36	0
					35	0						35	0
					34	26						34	26
					34	0						34	0
					34	0						34	0
					33	0						33	0
					32	0						32	0
					32	5						32	5
					31	0						31	0
					31	0						31	0
					30	3						30	3
					30	0						30	0
					29	2						29	2
					27	6						27	6
					27	0						27	0
					25	0						25	0
					25	0						25	0
					25	0						25	0
					24	0						24	0
					24	6						24	6
					23	5						23	5
					23	0						23	0
					23	0						23	0
					23	0						23	0
					22	14						22	14
					22	0						22	0
					22	4						22	4
					21	1						21	1
					21	0						21	0
					20	19						20	19
					20	0						20	0
					20	0						20	0
					20	0						20	0
					19	0						19	0
					19	3						19	3
					17	0						17	0
					17	0						17	0
					17	0						17	0
					17	37						17	37
					17	0						17	0
					17	0						17	0
					17	0						17	0
					17	5						17	5
					16	0						16	0
					16	4						16	4
					16	0						16	0
					15	0						15	0
					15	0						15	0
					14	0						14	0
					14	0						14	0
					14	0						14	0
					14	0						14	0
					14	0						14	0
					13	0						13	0
					13	0						13	0
					13	0						13	0
					13	0						13	0
					12	0						12	0
					12	0						12	0
					12	0						12	0
					12	0						12	0
					12	7						12	7
					11	3						11	3
					11	0						11	0
					11	0						11	0
					11	0						11	0
					10	11						10	11
					10	3						10	3
					10	0						10	0
					9	0						9	0
					9	0						9	0
					9	0						9	0
					9	0						9	0
					9	0						9	0
					9	0						9	0
					9	11						9	11
					9	0						9	0
					9	0						9	0
					8	0						8	0
					8	0						8	0
					8	3						8	3
					8	0						8	0
					8	0						8	0
					7	0						7	0
					7	0						7	0
					7	7						7	7
					7	0						7	0
					7	1						7	1
					6	0						6	0
					6	13						6	13
					6	0						6	0
					5	33						5	33
					5	0						5	0
					5	0						5	0
					5	0						5	0
					4	0						4	0
					4	0						4	0
					4	0						4	0
					4	0						4	0
					4	0						4	0
					3	4						3	4
					3	0						3	0
					3	0						3	0
					3	0						3	0
					3	0						3	0
					2	0						2	0
					2	0						2	0
					2	0						2	0
					2	0						2	0
					2	0						2	0
					2	0						2	0
					2	0						2	0
					1	0						1	0
					1	0						1	0
					1	0						1	0
					1	0						1	0
					1	0						1	0
	104	9	107	84	259	78		104	9	107	84	259	78
	1205.62	9.28846	30.1028	17.8785	155.722	5.87259		1205.62	9.28846	30.1028	17.8785	155.722	5.87259
	99.2296		40.6085		96.2288			99.2296		40.6085		96.2288

## Sheet: TAN
SubjectID	Age	Sex	BL_KKA_AL	BL_KKA_AL_QC	BL_KKA_AL_postQC	BL_KKA_TT	BL_KKA_TT_QC	BL_KKA_TT_postQC	BL_KKA_HW	BL_KKA_HW_QC	BL_KKA_HW_postQC	BL_KKB_AL	BL_KKB_AL_QC	BL_KKB_AL_PostQC	BL_KKB_TT	BL_KKB_TT_QC	BL_KKB_TT_postQC	BL_KKB_HW	BL_KKB_HW_QC	BL_KKB_HW_postQC	FU_KKA_AL	FU_KKA_AL_QC	FU_KKA_AL_postQC	FU_KKA_TT	FU_KKA_TT_QC	FU_KKA_TT_postQC	FU_KKA_HW	FU_KKA_HW_QC	FU_KKA_HW_postQC	FU_KKB_AL	FU_KKB_AL_QC	FU_KKB_AL_PostQC	FU_KKB_TT	FU_KKB_TT_QC	FU_KKB_TT_postQC	FU_KKB_HW	FU_KKB_HW_QC	FU_KKB_HW_postQC
TA001	12	2	49		49	146		146	0		0	53		53	145		145	0		0	1		1	148		148	0		0	0		0	176		176	0		0
TA002	10	2	0		0	17		17	0		0	0		0	16		16	0		0	0		0	33		33	0		0	0		0	46		46	0		0
TA003	12	2	195		195	102		102	5		5	187		187	97		97	2		2	0		0	23		23	0		0	0		0	121		121	1		1
TA004	11	2	130		130	113		113	0		0	124		124	104		104	0		0	0		0	200		200	0		0	0		0	150		150	0		0
TA005	12	2	0		0	233		233	0		0	0		0	257		257	0		0	0		0	524		524	0		0	0		0	670		670	0		0
TA006	11	2	0		0	31		31	0		0	0		0	35		35	0		0	0		0	2		2	0		0	0		0	19		19	0		0
TA007	11	2	0		0	42		42	0		0	0		0	54		54	0		0	0		0	37		37	0		0	0		0	66		66	0		0
TA008	12	2	0		0	81		81	0		0	0		0	77		77	0		0	0		0	45		45	0		0	0		0	36		36	0		0
TA009	11	2	103		103	16		16	0		0	116		116	13		13	0		0	0		0	16		16	0		0	0		0	27		27	0		0
TA010	13	2	0		0	337		337	3		3	0		0	357		357	1		1	0		0	454		454	0		0	0		0	449		449	0		0
TA011	11	2	0		0	19		19	0		0	0		0	23		23	0		0	0		0	10		10	0		0	0		0	11		11	0		0
TA012	11	2	793		793	64		64	0		0	754		754	77		77	0		0	0		0	165		165	0		0	0		0	264		264	1		1
TA013	11	2	555	680	555	11	23	23	0	0	0	552	557	552	21	26	21	0	0	0	0	0	0	0	0	0	0	0	0	0	0	0	0	0	0	0	0	0
TA014	11	2	112		112	3		3	0		0	120		120	10		10	0		0	0		0	17		17	0		0	0		0	11		11	0		0
TA015	12	2	231		231	70		70	12		12	157		157	39		39	8		8	0		0	0		0	0		0	0		0	0		0	0		0
TA016	12	2	0		0	58		58	1		1	0		0	89		89	0		0	0		0	346		346	0		0	0		0	896		896	0		0
TA017	11	2	423		423	39		39	0		0	1069		1069	37		37	3		3	0		0	9		9	0		0	0		0	30		30	0		0
TA018	12	1	0		0	225		225	0		0	0		0	213		213	0		0	0		0	497		497	0		0	0		0	502		502	0		0
TA019	12	1	65	78	65	42	52	42	10	8	10	59	94	94	36	64	64	3	11	3	0	0	0	268	291	268	18	21	18	0	0	0	216	226	216	32	34	32
TA020	13	1	897		897	318		318	5		5	886		886	299		299	2		2	0		0	185		185	0		0	0		0	177		177	0		0
TA021	12	1	483		483	32		32	0		0	499		499	55		55	0		0	0		0	269		269	0		0	1		1	265		265	4		4
TA022	11	1	1024		1024	83		83	0		0	1031		1031	98		98	0		0	0		0	227		227	4		4	0		0	267		267	5		5
TA023	11	1	13		13	6		6	0		0	24		24	5		5	0		0	0		0	71		71	0		0	0		0	58		58	0		0
TA024	12	1	0		0	79		79	0		0	0		0	88		88	0		0	0		0	695		695	9		9	0		0	1597		1597	21		21
TA025	12	1	1110		1110	97		97	10		10	1211		1211	106		106	19		19	0		0	105		105	0		0	0		0	58		58	0		0
TA026	7	1	306		306	98		98	0		0	315		315	99		99	0		0	0		0	74		74	0		0	0		0	157		157	0		0
TA027	11	1	0		0	38		38	30		30	0		0	41		41	34		34	0		0	52		52	0		0	0		0	48		48	0		0
TA028	10	1	3660		3660	616		616	0		0	4852		4852	456		456	2		2	0		0	144		144	0		0	0		0	169		169	0		0
TA029	7	1	0		0	21		21	8		8	0		0	23		23	7		7	0		0	41		41	0		0	0		0	50		50	0		0
TA030	9	1	805		805	129		129	0		0	816		816	132		132	0		0	0		0	495		495	0		0	0		0	352		352	0		0
TA031	7	1	0		0	15		15	2		2	0		0	17		17	1		1
TA032	7	1	399		399	284		284	2		2	416		416	281		281	1		1
TA033	11	1	682		682	145		145	0		0	745		745	154		154	0		0	0		0	187		187	0		0	0		0	118		118	0		0
TA034	8	2	0	0	0	288	589	589	0	0	0	0	0	0	209	250	209	0	0	0	0	0	0	1039	1195	1039	0	0	0	0	0	0	1027	840	1027	0	0	0
TA035	11	2	117		117	34		34	0		0	159		159	55		55	0		0	0		0	170		170	0		0	0		0	177		177	0		0
TA036	8	2	749		749	85		85	0		0	726		726	67		67	0		0	0		0	23		23	0		0	0		0	54		54	0		0
TA037	10	2	355		355	184		184	0		0	624		624	327		327	2		2	0		0	267		267	1		1	0		0	212		212	0		0
TA038	11	2	300	369	300	44	70	70	0	0	0	266	277	266	45	49	45	0	0	0	0	0	0	86	95	86	0	0	0	0	0	0	53	62	53	0	0	0
TA039	7	2	1904		1904	618		618	10		10	2181		2181	524		524	16		16	0		0	15		15	0		0	0		0	24		24	0		0
TA040	8	2	0		0	32		32	35		35	0		0	36		36	32		32	0		0	14		14	0		0	0		0	6		6	0		0
TA041	7	2	0		0	12		12	0		0	0		0	16		16	0		0	0		0	10		10	0		0	0		0	15		15	0		0
TA042	10	2	0		0	194		194	0		0	0		0	201		201	0		0	0		0	329		329	0		0	0		0	347		347	0		0
TA043	9	2	2298		2298	123		123	0		0	2305		2305	130		130	0		0	0		0	180		180	0		0	0		0	192		192	0		0
TA044	7	2	0		0	22		22	0		0	0		0	21		21	0		0	0		0	77		77	0		0	0		0	85		85	0		0
TA045	9	2	0		0	135		135	0		0	0		0	143		143	0		0	0		0	408		408	0		0	0		0	374		374	0		0
TA046	7	2	1783		1783	139		139	14		14	1910		1910	150		150	16		16	0		0	987		987	0		0	0		0	1236		1236	0		0
TA047	8	1	0		0	97		97	0		0	1		1	125		125	1		1	0		0	1495		1495	2		2	0		0	1501		1501	2		2
TA048	9	2	192		192	268		268	11		11	130		130	158		158	4		4	0		0	437		437	0		0	0		0	439		439	0		0
TA049	9	2	191		191	46		46	0		0	321		321	107		107	0		0	0		0	84		84	0		0	0		0	63		63	0		0
TA050	11	2	827		827	308		308	0		0	1751		1751	721		721	0		0	0		0	1507		1507	0		0	0		0	1236		1236	0		0
TA051	10	2	1108		1108	346		346	0		0	1993		1993	667		667	0		0	0		0	925		925	0		0	0		0	931		931	0		0
TA052	12	2	0		0	84		84	2		2	0		0	52		52	0		0
TA053	9	2	403		403	38		38	0		0	661		661	59		59	0		0	0		0	96		96	0		0	0		0	112		112	0		0
TA054	8	2	911		911	468		468	0		0	898		898	439		439	0		0	0	0	0	273	257	273	0	0	0	0	0	0	280	360	280	0	0	0
TA055	8	2	278		278	11		11	0		0	286		286	13		13	0		0	0		0	78		78	0		0	0		0	90		90	0		0
TA056	11	2	0		0	57		57	0		0	0		0	17		17	0		0	0		0	57		57	0		0	0		0	58		58	0		0
TA057	8	2	0		0	320		320	0		0	0		0	298		298	0		0	0		0	89		89	0		0	0		0	97		97	0		0
TA058	11	1	24		24	402		402	0		0	10		10	381		381	0		0	0		0	450		450	0		0	0		0	575		575	0		0
TA059	10	1	726		726	259		259	14		14	544		544	151		151	0		0	0	0	0	394	399	394	0	0	0	0	0	0	490	603	490	0	0	0
TA060	9	1	158		158	129		129	2		2	195		195	125		125	10		10	0		0	401		401	0		0	0		0	394		394	0		0
TA061	10	1	1257		1257	457		457	2		2	752		752	430		430	0		0	0		0	519		519	4		4	0		0	528		528	7		7
TA062	9	1	1850		1850	43		43	3		3	3480		3480	125		125	0		0	0		0	55		55	5		5	0		0	119		119	5		5
TA063	10	2	575		575	201		201	6		6	298		298	23		23	0		0	0	0	0	100	85	85	0	0	0	0	0	0	91	86	91	0	0	0
TA064	12	1	0		0	354		354	0		0	0		0	409		409	0		0	0		0	233		233	0		0	0		0	242		242	0		0
TA065	11	2	318		318	847		847	1		1	561		561	1225		1225	7		7	0		0	292		292	2		2	0		0	300		300	1		1
TA066	9	1	0		0	62		62	0		0	0		0	64		64	0		0	0		0	225		225	0		0	0		0	165		165	0		0
TA067	9	1	2626		2626	798		798	0		0	2233		2233	583		583	0		0	0		0	581		581	0		0	0		0	682		682	0		0
TA068	11	1	897		897	129		129	15		15	1387		1387	83		83	12		12	0		0	367		367	5		5	0		0	295		295	6		6
TA069	11	1	0		0	39		39	0		0	0		0	47		47	0		0	0		0	69		69	0		0	0		0	89		89	0		0
TA070	12	1	821		821	30		30	0		0	1307		1307	186		186	0		0	0		0	32		32	0		0	0		0	36		36	1		1
TA071	11	1	0		0	14		14	2		2	0		0	9		9	1		1	0		0	53		53	0		0	0		0	45		45	0		0
TA072	10	2	1230		1230	716		716	0		0	2811		2811	1295		1295	0		0	0		0	88		88	0		0	0		0	115		115	0		0
TA073	13	2	782		782	53		53	0		0	1618		1618	151		151	0		0	0		0	51		51	0		0	0		0	33		33	0		0
TA074	12	1	0	0	0	89	109	89	0	0	0	0	0	0	95	94	95	0	0	0	0		0	184		184	0		0	0		0	159		159	0		0
TA075	10	1	0	0	0	346	339	346	3	0	3	0	0	0	480	426	480	5	0	5	0		0	908		908	5		5	0		0	899		899	7		7
TA076	11	1	2048		2048	250		250	3		3	2034		2034	493		493	2		2	0	0	0	341	429	429	1	0	1	0	0	0	245	425	425	1	0	1
TA077	12	1	2313		2313	285		285	14		14	1665		1665	135		135	11		11	0		0	623		623	0		0	0		0	792		792	2		2
TA078	10	1	1259		1259	347		347	0		0	2418		2418	1583		1583	0		0	0	0	0	99	92	99	0	0	0	0	0	0	132	129	132	0	0	0
TA079	11	1	600		600	139		139	0		0	942		942	123		123	0		0	0		0	226		226	0		0	0		0	216		216	0		0
TA080	10	1	25		25	111		111	0		0	0		0	153		153	0		0	0	0	0	73	71	73	0	0	0	0	0	0	66	55	66	0	0	0
TA081	10	1	0		0	98		98	0		0	0		0	157		157	0		0	0		0	489		489	0		0	0		0	498		498	0		0
TA082	10	1	0		0	153		153	3		3	0		0	155		155	5		5	0		0	59		59	0		0	0		0	172		172	1		1
TA083	11	1	568		568	165		165	0		0	726		726	324		324	0		0	0		0	661		661	0		0	0		0	653		653	0		0
TA084	14	2	375		375	132		132	0		0	426		426	176		176	0		0	0		0	138		138	0		0	0		0	122		122	0		0
TA085	10	2	0		0	581		581	8		8	0		0	752		752	10		10	0		0	692		692	1		1	0		0	775		775	1		1
TA086	10	2	165		165	325		325	4		4	163		163	339		339	7		7
TA087	10	2	2872		2872	462		462	53		53	3342		3342	350		350	12		12	0		0	113		113	4		4	0		0	107		107	4		4
TA088	10	2	69		69	66		66	0		0	74		74	44		44	0		0	0		0	427		427	0		0	0		0	396		396	0		0
TA089	10	2	249		249	30		30	0		0	274		274	22		22	0		0	0		0	109		109	0		0	0		0	130		130	0		0
TA090	11	2	1220		1220	122		122	0		0	1027		1027	107		107	0		0	0		0	370		370	0		0	0		0	336		336	0		0
TA091	12	2	0		0	135		135	0		0	0		0	144		144	0		0
TA092	12	2	0		0	13		13	0		0	0		0	24		24	0		0	0		0	28		28	0		0	0		0	36		36	0		0
TA093	10	2	0		0	33		33	0		0	0		0	34		34	0		0	0		0	11		11	0		0	0		0	15		15	0		0
TA094	12	2	0	0	0	15	15	15	0	0	0	0	0	0	29	23	29	0	0	0	0	0	0	15	18	15	0	0	0	0	0	0	21	30	21	0	0	0
TA095	11	2	2426	2481	2426	120	122	120	0	0	0	4113	3616	4113	98	88	98	0	0	0	1	1	1	88	82	88	0	0	0	3	3	3	94	90	94	0	0	0
TA096	12	2	1356		1356	124		124	0		0	1583		1583	162		162	0		0	0		0	27		27	0		0	0		0	33		33	0		0
TA097	11	2	0		0	189		189	0		0	0		0	215		215	0		0
TA098	11	2	0		0	17		17	0		0	0		0	34		34	0		0	0		0	20		20	0		0	0		0	18		18	0		0
TA099	12	2	164		164	60		60	0		0	101		101	75		75	0		0	0		0	159		159	0		0	0		0	138		138	0		0
TA100	11	2	0		0	19		19	0		0	0		0	15		15	0		0	0		0	26		26	0		0	0		0	22		22	0		0
TA101	11	2	326		326	13		13	0		0	176		176	14		14	0		0	0		0	22		22	0		0	0		0	35		35	0		0
TA102	11	2	0		0	54		54	0		0	0		0	34		34	0		0	0		0	73		73	0		0	0		0	71		71	0		0
TA103	12	1	0		0	116		116	21		21	0		0	132		132	22		22	0		0	185		185	0		0	0		0	155		155	5		5
TA104	11	1	120		120	30		30	0		0	102		102	43		43	0		0	0		0	27		27	0		0	0		0	68		68	0		0
TA105	12	1	416		416	57		57	0		0	446		446	75		75	0		0	0		0	94		94	0		0	0		0	181		181	0		0
TA106	13	1	0		0	21		21	3		3	0		0	18		18	0		0	0		0	13		13	0		0	0		0	13		13	0		0
TA107	12	1	0	0	0	52	41	52	0	0	0	0	0	0	49	55	49	0	0	0	0	0	0	51	43	51	0	0	0	0	0	0	39	45	39	0	0	0
TA108	12	1	0		0	12		12	3		3	0		0	5		5	6		6	0		0	11		11	0		0	0		0	11		11	0		0
TA109	14	2	0		0	7		7	0		0	0		0	12		12	0		0	0		0	20		20	0		0	0		0	32		32	0		0
TA110	12	2	337		337	110		110	0		0	338		338	115		115	0		0	0		0	238		238	0		0	0		0	144		144	0		0
TA111	12	2	0		0	49		49	8		8	0		0	38		38	9		9	0		0	26		26	0		0	0		0	26		26	0		0
TA112	11	2	0		0	68		68	9		9	0		0	42		42	4		4	0		0	126		126	6		6	0		0	135		135	2		2
TA113	11	2	0		0	94		94	0		0	0		0	149		149	0		0	0		0	75		75	0		0	0		0	67		67	0		0
TA114	11	2	0		0	124		124	0		0	0		0	161		161	0		0	0		0	253		253	0		0	0		0	241		241	0		0
TA115	11	2	10		10	8		8	0		0	7		7	15		15	0		0	0		0	17		17	0		0	0		0	25		25	0		0
TA116	10	2	0		0	49		49	2		2	0		0	50		50	1		1	0		0	83		83	0		0	0		0	135		135	0		0
TA117	11	2	0		0	9		9	0		0	0		0	23		23	0		0	0		0	24		24	0		0	0		0	31		31	0		0
TA118	13	2	114		114	24		24	0		0	84		84	14		14	0		0	0		0	55		55	0		0	0		0	66		66	0		0
TA119	12	1	0		0	198		198	0		0	0		0	147		147	0		0	0		0	54		54	0		0	0		0	43		43	0		0
TA120	12	2	0		0	0		0	0		0	0		0	0		0	0		0
TA121	10	1	829		829	6		6	0		0	808		808	8		8	0		0	0		0	12		12	0		0	0		0	4		4	0		0
TA122	12	2	0		0	11		11	0		0	0		0	9		9	0		0	0		0	3		3	0		0	0		0	5		5	0		0
TA123	11	2	950		950	96		96	0		0	1173		1173	164		164	0		0	0		0	38		38	0		0	0		0	41		41	0		0
TA124	13	1	91		91	65		65	5		5	117		117	67		67	3		3	0		0	58		58	9		9	0		0	40		40	4		4
TA125	11	2	1119		1119	6		6	0		0	2067		2067	6		6	0		0	0		0	0		0	0		0	0		0	0		0	0		0
TA126	11	1	0		0	69		69	0		0	0		0	72		72	0		0	0		0	60		60	0		0	0		0	48		48	0		0
TA127	11	2	238		238	46		46	0		0	329		329	86		86	0		0	0		0	5		5	0		0	0		0	5		5	0		0
TA128	11	1	0		0	61		61	12		12	0		0	72		72	5		5	0		0	145		145	10		10	0		0	121		121	5		5
TA129	11	2	21		21	10		10	0		0	10		10	9		9	0		0	0		0	22		22	0		0	0		0	14		14	0		0
TA130	11	1	894		894	228		228	17		17	879		879	106		106	12		12	0		0	264		264	0		0	0		0	166		166	0		0
TA131	11	2	0		0	113		113	0		0	0		0	84		84	0		0	0		0	50		50	0		0	0		0	21		21	0		0
TA132	11	1	0		0	10		10	0		0	0		0	22		22	0		0	0		0	11		11	0		0	0		0	14		14	0		0
TA133	13	2	0		0	21		21	0		0	0		0	34		34	0		0	0		0	30		30	0		0	0		0	31		31	0		0
TA134	13	1	101	98	101	3	5	3	10	7	10	102	105	102	1	4	1	4	2	4	0	0	0	4	4	4	1	2	1	0	0	0	10	9	10	4	4	4
TA135	12	2	0		0	6		6	3		3	0		0	4		4	3		3	0		0	1		1	1		1	0		0	4		4	1		1
TA136	14	1	236		236	74		74	0		0	253		253	115		115	0		0	0		0	119		119	0		0	0		0	53		53	0		0
TA137	10	2	0		0	5		5	0		0	0		0	17		17	0		0	0		0	10		10	0		0	0		0	12		12	0		0
TA138	12	1	944		944	47		47	0		0	992		992	84		84	0		0	0		0	19		19	0		0	0		0	23		23	0		0
TA139	11	2	288		288	39		39	0		0	412		412	50		50	0		0	0		0	10		10	0		0	0		0	16		16	0		0
TA140	12	1	0		0	27		27	1		1	0		0	47		47	2		2	7		7	120		120	0		0	10		10	101		101	0		0
TA141	11	2	290		290	54		54	0		0	349		349	65		65	0		0	0		0	10		10	0		0	0		0	15		15	0		0
TA142	11	1	2067		2067	404		404	0		0	2144		2144	539		539	0		0	0		0	33		33	0		0	0		0	96		96	0		0
TA143	11	2	16		16	2		2	0		0	40		40	3		3	0		0	1		1	13		13	0		0	0		0	20		20	0		0
TA144	12	1	323		323	22		22	0		0	348		348	26		26	0		0	0		0	73		73	0		0	0		0	103		103	0		0
TA145	11	2	736		736	157		157	0		0	629		629	144		144	0		0	0		0	82		82	0		0	0		0	128		128	0		0
TA146	12	1	1628		1628	174		174	0		0	1205		1205	128		128	0		0	0		0	34		34	0		0	0		0	37		37	0		0
TA147	11	2	475		475	145		145	0		0	589		589	148		148	0		0	0		0	427		427	0		0	0		0	302		302	0		0
TA148	11	1	163		163	49		49	9		9	154		154	64		64	6		6	0		0	44		44	5		5	0		0	46		46	4		4
TA149	12	2	0		0	45		45	0		0	0		0	32		32	0		0	0		0	11		11	0		0	0		0	21		21	0		0
TA150	12	2	0		0	0		0	0		0	0		0	0		0	0		0	0		0	0		0	0		0	0		0	0		0	0		0
TA151	11	2	189		189	18		18	0		0	176		176	28		28	0		0	0		0	15		15	0		0	0		0	7		7	0		0
TA152	12	2	253		253	21		21	0		0	261		261	20		20	0		0
TA153	11	2	555		555	25		25	0		0	744		744	56		56	0		0	0		0	4		4	0		0	0		0	2		2	0		0
TA154	12	2	0		0	1033		1033	35		35	0		0	1998		1998	45		45	0		0	1838		1838	5		5	0		0	2115		2115	4		4
TA155	9	1	0		0	10		10	0		0	0		0	14		14	0		0	0		0	7		7	0		0	0		0	9		9	0		0
TA156	7	1	0		0	21		21	0		0	0		0	14		14	0		0	0		0	5		5	0		0	0		0	11		11	0		0
TA157	10	1	0	0	0	82	72	82	0	0	0	0	0	0	101	93	101	0	0	0	0	0	0	238	197	238	0	0	0	0	0	0	70	77	70	0	0	0
TA158	7	1	1621		1621	101		101	0		0	2335		2335	98		98	0		0	0		0	152		152	0		0	0		0	202		202	0		0
TA159	8	1	542		542	39		39	0		0	955		955	63		63	0		0	0		0	115		115	0		0	0		0	147		147	0		0
TA160	7	1	5085		5085	423		423	39		39	5895		5895	500		500	36		36	0		0	437		437	13		13	0		0	391		391	15		15
TA161	8	2	0		0	145		145	5		5	0		0	134		134	4		4	0		0	198		198	0		0	0		0	192		192	0		0
TA162	8	2	43		43	17		17	0		0	56		56	37		37	0		0	0		0	23		23	0		0	0		0	30		30	0		0
TA163	8	1	997		997	60		60	0		0	1341		1341	121		121	0		0	0		0	76		76	0		0	0		0	74		74	0		0
TA164	7	2	0		0	12		12	0		0	0		0	28		28	0		0	0		0	87		87	0		0	0		0	101		101	0		0
TA165	9	2	886		886	46		46	0		0	760		760	136		136	0		0	0		0	42		42	0		0	0		0	43		43	0		0
TA166	7	2	0		0	235		235	0		0	0		0	286		286	0		0	0		0	41		41	0		0	0		0	23		23	0		0
TA167	8	2	1953		1953	285		285	40		40	1993		1993	348		348	32		32	2141		2141	556		556	0		0	2898		2898	374		374	0		0
TA168	8	2	860	921	860	101	113	101	5	0	5	1192	1009	1192	108	99	108	14	5	14	604	723	604	64	245	245	0	0	0	624	680	624	70	186	186	0	0	0
TA169	8	2	0		0	7		7	0		0	0		0	19		19	0		0	0		0	10		10	0		0	0		0	5		5	0		0
TA170	9	1	5		5	572		572	0		0	0		0	647		647	0		0
TA171	9	2	0		0	41		41	0		0	0		0	132		132	0		0	432		432	20		20	0		0	412		412	27		27	0		0
TA172	8	2	3075		3075	185		185	44		44	1752		1752	71		71	14		14
TA173	11	1	277		277	75		75	5		5	286		286	93		93	3		3	0		0	146		146	0		0	0		0	133		133	0		0
TA174	9	2	0		0	17		17	0		0	0		0	13		13	0		0	0		0	26		26	0		0	0		0	39		39	0		0
TA175	8	1	115		115	18		18	0		0	125		125	22		22	0		0	0		0	96		96	0		0	0		0	96		96	0		0
TA176	7	2	0		0	755		755	0		0	0		0	723		723	0		0
TA177	7	2	0		0	12		12	0		0	0		0	10		10	0		0	0		0	4		4	0		0	0		0	3		3	0		0
TA178	7	2	0		0	30		30	0		0	0		0	39		39	0		0	0		0	38		38	0		0	0		0	52		52	0		0
TA179	7	2	0		0	31		31	8		8	0		0	53		53	17		17	32		32	81		81	15		15	29		29	168		168	24		24
TA180	7	2	3906		3906	128		128	4		4	4766		4766	92		92	2		2	0		0	713		713	4		4	0		0	658		658	3		3
TA181	8	2	145		145	31		31	36		36	170		170	46		46	25		25	0		0	38		38	13		13	0		0	33		33	18		18
TA182	7	2	0	0	0	16	25	16	0	0	0	0	0	0	21	24	21	0	0	0	0	0	0	5	4	5	0	0	0	0	0	0	2	5	2	0	0	0
TA183	8	2	0		0	27		27	0		0	1		1	18		18	0		0	35		35	26		26	0		0	22		22	28		28	0		0
TA184	10	2	213		213	13		13	0		0	182		182	13		13	0		0	0		0	15		15	0		0	0		0	14		14	0		0
TA185	8	1	0		0	336		336	4		4	0		0	607		607	5		5	0		0	157		157	0		0	0		0	163		163	0		0
TA186	8	2	0		0	19		19	0		0	0		0	18		18	0		0	0		0	19		19	0		0	0		0	13		13	0		0
TA187	8	1	6415		6415	462		462	8		8	3173		3173	402		402	16		16	0		0	1107		1107	16		16	0		0	1113		1113	12		12
TA188	7	2	0		0	5		5	0		0	0		0	19		19	0		0	0		0	8		8	0		0	0		0	10		10	0		0
TA189	10	1	7	7	7	78	71	78	0	0	0	5	9	5	67	60	67	0	0	0	0	0	0	88	79	88	0	0	0	0	0	0	77	72	77	0	0	0
TA190	7	2	0		0	14		14	0		0	0		0	9		9	0		0
TA191	8	2	0		0	14		14	0		0	0		0	42		42	0		0	0		0	18		18	0		0	0		0	34		34	0		0
TA192	7	2	992		992	80		80	5		5	1010		1010	89		89	4		4	0		0	145		145	0		0	0		0	138		138	0		0
TA193	8	2	685		685	25		25	0		0	785		785	62		62	0		0	0		0	114		114	0		0	0		0	46		46	0		0
TA194	8	1	0		0	20		20	0		0	0		0	28		28	0		0	0		0	45		45	0		0	0		0	31		31	0		0
TA195	8	1	0	0	0	0	0	0	0	0	0	0	0	0	0	0	0	0	0	0
TA196	8	2	171		171	29		29	0		0	239		239	34		34	0		0	0		0	45		45	0		0	0		0	116		116	0		0
TA197	7	2	0		0	10		10	0		0	0		0	12		12	0		0	0		0	14		14	0		0	0		0	12		12	0		0
TA198	8	2	0	3	3	33	31	33	0	0	0	0	1	1	40	30	40	0	0	0	0		0	14		14	0		0	0		0	18		18	0		0
TA199	7	2	229		229	55		55	0		0	158		158	47		47	0		0	0		0	63		63	0		0	0		0	67		67	0		0
TA200	8	2	622		622	59		59	0		0	786		786	62		62	0		0	0		0	112		112	0		0	0		0	118		118	0		0
TA201	7	2	0		0	20		20	0		0	0		0	31		31	0		0	0		0	81		81	0		0	0		0	57		57	0		0
TA202	9	1	1276		1276	267		267	0		0	1075		1075	164		164	0		0	0		0	126		126	0		0	0		0	129		129	0		0
TA203	8	1	0		0	2		2	0		0	0		0	1		1	0		0	0		0	3		3	0		0	0		0	5		5	0		0
TA204	9	1	80		80	218		218	0		0	71		71	508		508	0		0	0		0	138		138	0		0	0		0	116		116	0		0
TA205	8	1	1136		1136	46		46	0		0	918		918	75		75	0		0	0		0	50		50	0		0	0		0	71		71	0		0
TA206	9	1	841		841	151		151	0		0	912		912	157		157	0		0	0		0	597		597	0		0	0		0	294		294	0		0
TA207	7	1	0		0	15		15	0		0	0		0	15		15	0		0
TA208	7	2	11		11	7		7	0		0	0		0	13		13	0		0	0		0	17		17	0		0	0		0	14		14	0		0
TA209	7	2	0		0	0		0	0		0	0		0	2		2	0		0
TA210	7	2	4495		4495	201		201	7		7	3951		3951	205		205	8		8	0		0	812		812	0		0	0		0	824		824	0		0
TA211	8	2	0		0	67		67	0		0	0		0	53		53	0		0
TA212	7	2	0		0	8		8	0		0	0		0	4		4	0		0	0		0	3		3	0		0	0		0	4		4	0		0
TA213	8	2	0		0	360		360	0		0	0		0	363		363	0		0
TA214	8	2	1		1	114		114	0		0	17		17	147		147	0		0	0		0	9		9	0		0	0		0	18		18	0		0
TA215	7	1	300		300	81		81	0		0	260		260	125		125	0		0	0		0	8		8	0		0	0		0	10		10	0		0
TA216	10	1	180		180	146		146	16		16	220		220	92		92	20		20	0		0	95		95	0		0	0		0	89		89	0		0
TA217	14	1	99		99	15		15	0		0	56		56	14		14	0		0	0		0	2		2	0		0	0		0	4		4	0		0
TA218	10	1	942		942	764		764	8		8	989		989	864		864	27		27	0		0	231		231	0		0	0		0	240		240	0		0
TA219	13	1	0		0	40		40	86		86	0		0	90		90	116		116	0		0	26		26	25		25	0		0	20		20	21		21
TA220	12	1	45		45	54		54	0		0	35		35	58		58	0		0	0		0	12		12	0		0	0		0	15		15	0		0
TA221	11	2	0		0	15		15	0		0	0		0	25		25	0		0	0		0	29		29	0		0	0		0	36		36	0		0
TA222	11	2	0		0	56		56	0		0	0		0	72		72	0		0	0		0	22		22	0		0	0		0	19		19	0		0
TA223	10	2	0	0	0	45	38	45	0	0	0	0	0	0	50	41	50	0	0	0	0	0	0	21	20	21	0	0	0	0	0	0	20	23	20	0	0	0
TA224	11	2	301		301	88		88	3		3	283		283	82		82	4		4	0		0	180		180	0		0	0		0	146		146	0		0
TA225	11	2	1937		1937	147		147	0		0	2540		2540	290		290	0		0	123		123	17		17	8		8	141		141	22		22	9		9
TA226	12	2	389		389	47		47	92		92	390		390	45		45	96		96	0		0	38		38	0		0	0		0	45		45	0		0
TA227	14	2	78		78	131		131	140		140	69		69	124		124	154		154	0		0	45		45	0		0	0		0	36		36	0		0
TA228	14	2	28	30	28	6	5	6	2	2	2	20	25	20	8	6	8	0	1	0	0	0	0	1	1	1	0	0	0	0	0	0	0	0	0	0	0	0
TA229	12	2	0		0	16		16	0		0	0		0	11		11	0		0	0		0	0		0	0		0	0		0	3		3	0		0
TA230	12	2	1654		1654	27		27	18		18	1895		1895	32		32	24		24	0		0	47		47	0		0	0		0	39		39	0		0
TA231	12	1	0		0	26		26	5		5	0		0	25		25	1		1	0		0	27		27	2		2	0		0	29		29	1		1
TA232	13	1	163		163	129		129	0		0	140		140	117		117	0		0	0		0	78		78	0		0	0		0	67		67	0		0
TA233	11	1	523		523	77		77	0		0	491		491	52		52	0		0	20		20	22		22	0		0	14		14	14		14	0		0
TA234	14	1	697		697	102		102	13		13	665		665	81		81	13		13
TA235	11	1	0		0	43		43	0		0	0		0	48		48	0		0	0		0	41		41	0		0	0		0	30		30	0		0
TA236	13	1	66		66	2		2	0		0	57		57	6		6	0		0	0		0	3		3	0		0	0		0	4		4	0		0
TA237	11	1	0		0	98		98	1		1	0		0	79		79	1		1	0		0	56		56	0		0	0		0	44		44	0		0
TA238	13	1	0		0	49		49	0		0	0		0	58		58	0		0	0		0	36		36	0		0	0		0	44		44	0		0
TA239	13	1	0		0	0		0	0		0	0		0	0		0	0		0
TA240	12	1	0		0	0		0	0		0	0		0	0		0	0		0
TA241	11	2	0		0	90		90	0		0	0		0	108		108	0		0	0		0	53		53	0		0	0		0	48		48	0		0
TA242	11	2	0		0	298		298	0		0	0		0	315		315	0		0	0		0	166		166	0		0	0		0	185		185	0		0
TA243	12	2	0		0	2		2	0		0	0		0	4		4	0		0	0		0	2		2	0		0	0		0	0		0	0		0
TA244	12	2	371		371	196		196	23		23	359		359	216		216	12		12	0		0	46		46	0		0	0		0	51		51	0		0
TA245	12	2	0		0	91		91	11		11	0		0	89		89	7		7	0		0	51		51	0		0	0		0	49		49	0		0
TA246	11	1	0		0	111		111	0		0	0		0	87		87	0		0	0		0	62		62	0		0	0		0	54		54	0		0
TA247	13	1	2399		2399	98		98	11		11	2528		2528	105		105	14		14	0		0	58		58	3		3	0		0	61		61	2		2
TA248	12	1	96		96	412		412	2		2	63		63	305		305	3		3	0		0	93		93	2		2	0		0	101		101	3		3
TA249	15	1	0		0	90		90	21		21	0		0	85		85	18		18	0		0	131		131	0		0	0		0	152		152	0		0
TA250	13	1	174		174	193		193	60		60	177		177	198		198	57		57	0		0	130		130	0		0	0		0	151		151	0		0
TA251	10	1	265		265	8		8	2		2	298		298	8		8	1		1	0		0	0		0	0		0	0		0	0		0	0		0
TA252	13	2	17		17	10		10	0		0	20		20	15		15	0		0	0		0	49		49	0		0	0		0	62		62	0		0
TA253	11	1	0		0	66		66	2		2	0		0	78		78	1		1	0		0	24		24	0		0	0		0	38		38	0		0
TA254	12	2	0		0	271		271	82		82	0		0	297		297	98		98	0		0	82		82	1		1	0		0	91		91	2		2
TA255	12	2	1603		1603	154		154	0		0	1896		1896	120		120	0		0	0		0	12		12	0		0	0		0	9		9	0		0
TA256	12	2	713		713	63		63	0		0	696		696	79		79	0		0	0		0	10		10	0		0	0		0	8		8	0		0
TA257	11	2	130		130	48		48	0		0	113		113	36		36	0		0	0		0	20		20	0		0	0		0	12		12	0		0
TA258	12	2	1192		1192	128		128	39		39	1387		1387	160		160	45		45	0		0	230		230	0		0	0		0	284		284	0		0
TA259	11	2	257	267	257	101	92	101	0	0	0	266	275	266	117	107	117	0	0	0	0		0	42		42	0		0	0		0	49		49	0		0
TA260	12	2	0		0	85		85	1		1	0		0	101		101	4		4	0		0	141		141	0		0	0		0	117		117	0		0
TA261	10	1	107		107	151		151	80		80	131		131	201		201	84		84
TA262	11	2	1391		1391	502		502	0		0	1519		1519	598		598	0		0	0		0	712		712	0		0	0		0	644		644	0		0
TA263	12	1	267		267	717		717	8		8	304		304	954		954	11		11
TA264	11	2	480		480	444		444	0		0	474		474	427		427	0		0	0		0	143		143	0		0	0		0	159		159	0		0
TA265	13	1	373		373	660		660	3		3	414		414	696		696	4		4
TA266	13	1	122		122	1385		1385	21		21	105		105	1246		1246	23		23	0		0	1001		1001	3		3	0		0	987		987	2		2
TA267	13	1	686		686	116		116	47		47	712		712	139		139	42		42	0		0	209		209	43		43	0		0	182		182	38		38
TA268	10	1	318		318	52		52	8		8	343		343	60		60	14		14	0		0	284		284	0		0	0		0	310		310	0		0
TA269	10	2	338		338	116		116	8		8	299		299	129		129	7		7	166		166	19		19	5		5	156		156	15		15	2		2
TA270	13	1	1442	1519	1442	114	123	114	21	24	21	1557	1597	1557	107	116	107	15	25	15
TA271	13	1	1814		1814	244		244	41		41	2005		2005	329		329	49		49	0		0	515		515	4		4	0		0	568		568	6		6
TA272	12	2	1120		1120	15		15	32		32	842		842	26		26	34		34	0		0	417		417	0		0	0		0	382		382	0		0
TA273	11	1	1336		1336	760		760	9		9	1517		1517	896		896	14		14	0		0	71		71	4		4	0		0	78		78	2		2
TA274	11	2	0		0	120		120	12		12	0		0	139		139	11		11	0		0	31		31	0		0	0		0	40		40	0		0
TA275	12	1	154		154	74		74	28		28	135		135	65		65	31		31	0		0	28		28	9		9	0		0	25		25	12		12
TA276	11	2	100		100	15		15	2		2	89		89	14		14	1		1	0		0	25		25	0		0	0		0	21		21	0		0
TA277	11	1	0		0	546		546	35		35	0		0	598		598	33		33	0		0	472		472	4		4	0		0	466		466	7		7
TA278	11	2	281		281	385		385	0		0	279		279	391		391	0		0	157		157	15		15	5		5	146		146	12		12	4		4
TA279	11	1	0		0	401		401	59		59	0		0	423		423	56		56	0		0	69		69	0		0	0		0	74		74	0		0
TA280	11	2	0		0	70		70	0		0	0		0	76		76	0		0	0		0	0		0	0		0	0		0	0		0	0		0
TA281	11	1	0		0	22		22	4		4	0		0	29		29	5		5	0		0	33		33	0		0	0		0	29		29	0		0
TA282	11	2	1051		1051	62		62	0		0	1032		1032	70		70	0		0	0		0	130		130	0		0	0		0	139		139	0		0
TA283	12	1	930		930	77		77	91		91	997		997	91		91	87		87	6		6	145		145	0		0	5		5	150		150	0		0
TA284	11	2	221		221	92		92	23		23	186		186	67		67	11		11	0		0	146		146	0		0	0		0	132		132	0		0
TA285	11	1	0	0	0	72	81	72	0	0	0	0	0	0	91	82	91	0	0	0	0		0	20		20	0		0	0		0	10		10	0		0
TA286	11	1	0		0	173		173	0		0	1		1	211		211	0		0	0		0	35		35	0		0	0		0	41		41	0		0
TA287	11	2	512		512	75		75	14		14	455		455	49		49	14		14	0		0	63		63	0		0	0		0	56		56	0		0
TA288	11	2	679		679	172		172	0		0	590		590	198		198	0		0	0		0	53		53	0		0	0		0	48		48	0		0
TA289	12	1	2387		2387	52		52	0		0	2652		2652	67		67	0		0	0		0	349		349	0		0	0		0	304		304	0		0
TA290	12	2	3062		3062	252		252	8		8	3108		3108	224		224	10		10	0		0	141		141	0		0	0		0	138		138	0		0
TA291	11	1	110		110	188		188	8		8	103		103	195		195	4		4	0		0	178		178	2		2	0		0	166		166	1		1
TA292	11	1	811	821	811	437	447	437	34	41	34	882	901	882	439	444	439	29	34	29
TA293	11	1	0		0	61		61	0		0	0		0	55		55	0		0	0		0	29		29	0		0	0		0	21		21	0		0
TA294	14	1	0		0	29		29	18		18	0		0	23		23	20		20	0		0	32		32	0		0	0		0	39		39	0		0
TA295	11	1	0		0	71		71	0		0	0		0	53		53	0		0	0		0	5		5	0		0	0		0	10		10	0		0
TA296	9	2	0		0	170		170	3		3	0		0	192		192	5		5	0		0	281		281	4		4	0		0	293		293	1		1
TA297	13	1	42		42	48		48	1		1	59		59	55		55	2		2	0		0	71		71	0		0	0		0	78		78	0		0
TA298	9	2	0		0	220		220	60		60	0		0	302		302	77		77	0		0	139		139	0		0	0		0	121		121	0		0
TA299	11	2	97		97	10		10	0		0	88		88	14		14	0		0	0		0	8		8	0		0	0		0	15		15	0		0
TA300	9	2	0		0	167		167	3		3	0		0	158		158	1		1	0		0	28		28	0		0	0		0	31		31	0		0
TA301	11	2	1265		1265	74		74	0		0	1471		1471	92		92	0		0	0		0	135		135	0		0	0		0	129		129	0		0
TA302	11	2	662		662	123		123	26		26	631		631	115		115	18		18	0		0	301		301	0		0	0		0	325		325	0		0
TA303	12	2	877		877	81		81	0		0	726		726	65		65	0		0	0		0	75		75	0		0	0		0	89		89	0		0
TA304	12	2	159		159	99		99	0		0	123		123	82		82	0		0	0		0	97		97	0		0	0		0	81		81	0		0
TA305	11	2	0		0	5		5	0		0	0		0	7		7	0		0	0		0	0		0	0		0	0		0	0		0	0		0
TA306	11	1	0		0	34		34	5		5	0		0	41		41	3		3	0		0	196		196	0		0	0		0	218		218	0		0
TA307	11	1	0		0	22		22	4		4	0		0	28		28	8		8	0		0	32		32	0		0	0		0	52		52	0		0
TA308	11	2	0		0	160		160	5		5	0		0	149		149	2		2	0		0	120		120	0		0	0		0	134		134	0		0
TA309	11	1	1739		1739	43		43	0		0	1708		1708	34		34	0		0	0		0	183		183	0		0	0		0	201		201	0		0
TA310	11	1	0		0	43		43	0		0	0		0	47		47	0		0	0		0	278		278	0		0	0		0	260		260	0		0
TA311	11	1	230		230	18		18	24		24	207		207	15		15	20		20	0		0	38		38	0		0	0		0	52		52	0		0
TA312	11	1	0		0	17		17	0		0	0		0	13		13	0		0	0		0	205		205	0		0	0		0	198		198	0		0
TA313	11	1	43		43	121		121	0		0	48		48	111		111	0		0	15		15	286		286	2		2	20		20	302		302	4		4
TA314	11	1	983		983	43		43	12		12	892		892	25		25	9		9
TA315	11	1	712		712	5		5	3		3	1010		1010	12		12	6		6	0		0	20		20	0		0	0		0	14		14	0		0
			315	22	315	315	22	315	315	22	315	315	22	315	315	22	315	315	22	315	289	20	289	289	20	289	289	20	289	289	20	289	289	20	289	289	20	289
		SWISS		3			4			2			2			1			2			0			3			1			0			4			1
		WHO		4			10			2			5			10			3			1			8			1			0			9			1

## Sheet: TAN_ERR
dKK	BL_AS	FU_AS	BL_TT	FU_TT	BL_HW	FU_HW		BL_AS	FU_AS	BL_TT	FU_TT	BL_HW	FU_HW
	10980	0	3031	3953	294	0		10980	0	3031	3953	294	0
	9588	0	2631	1988	202	46		9588	0	2631	1988	202	46
	8672	0	2072	592	188	0		8672	0	2072	592	188	0
	8512	0	2011	203	180	3		8512	0	2011	203	180	3
	8446	0	1930	231	178	0		8446	0	1930	231	178	0
	6539	4	1656	149	137	0		6539	4	1656	149	137	0
	6214	0	1628	471	117	0		6214	0	1628	471	117	0
	6170	0	1381	1263	115	0		6170	0	1381	1263	115	0
	5330	0	1333	1467	90	10		5330	0	1333	1467	90	10
	5039	0	1144	938	89	81		5039	0	1144	938	89	81
	4927	0	1142	39	84	0		4927	0	1142	39	84	0
	4859	0	1100	1356	80	9		4859	0	1100	1356	80	9
	4603	0	1072	313	75	28		4603	0	1072	313	75	28
	4477	264	1029	2743	72	0		4477	264	1029	2743	72	0
	4211	0	1013	1856	68	11		4211	0	1013	1856	68	11
	4085	0	943	129	67	0		4085	0	943	129	67	0
	4082	0	943	320	66	0		4082	0	943	320	66	0
	4041	0	923	828	65	8		4041	0	923	828	65	8
	3978	0	907	553	64	0		3978	0	907	553	64	0
	3956	0	887	1047	61	31		3956	0	887	1047	61	31
	3946	5039	871	302	59	21		3946	5039	871	302	59	21
	3819	0	864	2220	44	5		3819	0	864	2220	44	5
	3693	0	826	1807	44	0		3693	0	826	1807	44	0
	3677	0	824	143	44	0		3677	0	824	143	44	0
	3549	0	812	220	43	5		3549	0	812	220	43	5
	3499	0	783	1025	42	0		3499	0	798	2066	42	0
	3447	0	776	27	39	0		3447	0	783	1025	39	0
	3186	0	763	475	38	0		3186	0	776	27	38	0
	3101	0	743	586	36	0		3101	0	763	475	36	0
	2939	0	726	254	35	0		2939	0	743	854	35	0
	2910	0	717	194	35	0		2910	0	726	254	35	0
	2853	0	694	903	34	0		2853	0	717	194	34	0
	2833	0	633	930	30	0		2833	0	694	903	30	0
	2736	0	618	186	29	0		2736	0	633	930	29	0
	2579	0	617	362	29	0		2579	0	618	186	29	0
	2578	0	613	351	28	0		2578	0	617	362	28	0
	2400	0	573	1083	27	11		2400	0	613	351	27	11
	2351	0	568	173	26	0		2351	0	573	1083	26	0
	2338	0	522	260	25	39		2338	0	568	173	25	39
	2321	0	521	64	25	2		2321	0	522	260	25	2
	2284	0	511	479	25	5		2284	0	521	64	25	5
	2247	0	497	2066	24	28		2247	0	511	479	24	28
	2128	0	490	1194	23	6		2128	0	490	1194	23	6
	2123	0	489	1314	23	0		2123	0	489	1314	23	0
	2083	0	476	279	22	0		2083	0	476	279	22	0
	2055	0	438	999	20	0		2055	0	438	999	20	0
	2054	0	437	39	19	0		2054	0	437	39	19	0
	2052	1228	431	255	18	2		2052	1228	431	255	18	2
	2009	0	426	876	18	0		2009	0	426	876	18	0
	2002	0	420	1415	18	0		2002	0	420	1415	18	0
	1962	0	412	97	17	0		1962	0	412	97	17	0
	1936	0	410	884	17	15		1936	0	410	884	17	15
	1931	0	406	1636	15	7		1931	0	406	1636	15	7
	1927	11	395	676	15	0		1927	11	395	676	15	0
	1809	0	391	281	15	0		1809	0	391	281	15	0
	1783	0	384	76	15	9		1783	0	384	76	15	9
	1773	0	383	344	15	0		1773	0	383	344	15	0
	1753	0	370	101	14	0		1753	0	370	101	14	0
	1722	0	362	574	14	5		1722	0	362	574	14	5
	1646	0	345	97	13	50		1646	0	345	97	13	50
	1637	0	334	430	13	8		1637	0	334	430	13	8
	1621	0	325	59	12	0		1621	0	325	59	12	0
	1603	0	309	254	12	3		1603	0	309	254	12	3
	1547	0	308	231	12	0		1547	0	308	231	12	0
	1542	0	308	260	9	0		1542	0	308	260	9	0
	1497	0	308	891	9	0		1497	0	308	891	9	0
	1492	0	302	71	9	0		1492	0	302	71	9	0
	1475	0	301	210	9	0		1475	0	301	210	9	0
	1470	0	299	305	9	0		1470	0	299	305	9	0
	1427	0	293	729	9	0		1427	0	293	729	9	0
	1409	0	291	324	8	3		1409	0	291	324	8	3
	1408	0	289	2223	8	12		1408	0	289	2223	8	12
	1398	0	288	514	8	1		1398	0	288	514	8	1
	1365	0	286	60	8	13		1365	0	286	60	8	13
	1299	0	285	494	8	0		1299	0	285	494	8	0
	1294	0	279	390	8	5		1294	0	279	390	8	5
	1293	0	278	782	8	0		1293	0	278	782	8	0
	1270	0	274	21	7	1		1270	0	274	21	7	1
	1269	0	264	139	7	0		1269	0	264	139	7	0
	1107	0	262	442	7	0		1107	0	262	442	7	0
	1064	0	261	847	7	0		1064	0	261	847	7	0
	1064	0	261	27	6	0		1064	0	261	27	6	0
	1014	34	260	79	6	2		1014	34	260	79	6	2
	982	1	259	71	6	7		982	1	259	71	6	7
	979	0	255	987	6	3		979	0	255	987	6	3
	967	0	255	81	5	2		967	0	255	81	5	2
	954	0	255	391	5	5		954	0	255	391	5	5
	879	0	254	795	5	0		879	0	254	795	5	0
	873	0	253	372	4	0		873	0	253	372	4	0
	862	0	248	340	4	0		862	0	248	340	4	0
	801	0	246	145	3	0		801	0	246	145	3	0
	779	0	245	34	3	0		779	0	245	34	3	0
	730	0	243	142	3	10		730	0	243	142	3	10
	700	0	238	184	3	0		700	0	238	184	3	0
	675	0	238	626	3	0		675	0	238	626	3	0
	671	0	232	588	3	0		671	0	232	588	3	0
	661	0	229	706	3	0		661	0	229	706	3	0
	639	0	225	382	3	0		639	0	225	382	3	0
	637	322	224	191	3	0		637	322	224	176	3	0
	621	0	222	2996	3	0		621	0	222	2996	3	0
	584	0	220	1371	2	0		584	0	220	1371	2	0
	567	0	218	182	2	1		567	0	218	182	2	1
	566	0	218	91	2	11		566	0	218	91	2	11
	564	0	217	350	2	0		564	0	217	350	2	0
	563	0	216	68	2	0		563	0	216	68	2	0
	563	0	212	662	1	0		563	0	212	662	1	0
	560	303	209	134	1	4		560	303	209	431	1	4
	560	0	206	18				560	0	206	18
	523	0	204	84				523	0	204	84
	523	0	203	163				523	0	203	163
	512	0	203	119				512	0	203	119
	502	0	199	144				502	0	199	144
	489	0	199	354				489	0	199	354
	437	0	198	101				437	0	198	101
	410	0	198	116				410	0	198	116
	407	0	197	231				407	0	197	231
	400	0	197	71				400	0	197	71
	395	0	189	172				395	0	189	172
	388	0	186	258				388	0	186	258
	387	0	184	343				387	0	184	343
	382	0	183	308				382	0	183	308
	365	0	182	85				365	0	182	85
	353	0	181	494				353	0	181	494
	351	0	181	150				351	0	181	150
	322	0	181	178				322	0	181	178
	317	0	180	100				317	0	180	100
	315	0	177	100				315	0	177	100
	303	0	175	283				303	0	175	283
	289	0	173	47				289	0	173	47
	282	0	170	326				282	0	170	326
	276	0	169	283				276	0	169	283
	265	0	168	295				265	0	168	295
	254	0	168	174				254	0	168	174
	243	0	168	279				243	0	168	279
	240	0	167	2292				240	0	167	2292
	232	0	166	264				232	0	166	264
	227	0	163	30				227	0	163	30
	222	0	159	278				222	0	159	278
	219	0	158	81				219	0	158	81
	213	0	153	147				213	0	153	147
	208	0	152	77				208	0	152	77
	203	0	147	1242				203	0	147	1242
	198	0	146	0				198	0	146	0
	189	0	146	164				189	0	146	164
	185	0	145	165				185	0	145	165
	159	0	144	62				159	0	144	62
	155	0	142	18				159	0	142	18
	151	0	141	429				155	0	141	429
	147	0	141	108				151	0	141	108
	143	0	139	53				147	0	139	53
	124	0	135	297				143	0	135	297
	123	0	133	266				123	0	133	266
	102	1	132	275				102	1	132	275
	101	0	132	98				101	0	132	98
	99	0	132	10				99	0	132	10
	91	35	132	269				91	35	132	269
	80	0	131	42				80	0	131	42
	56	1	130	46				56	1	130	46
	48	0	129	36				48	0	129	36
	37	0	128	41				37	0	128	41
	37	0	126	390				37	0	126	390
	34	0	124	119				34	0	124	119
	31	0	124	15				31	0	124	15
	25	0	121	230				25	0	121	230
	18	0	121	121				18	0	121	121
	17	0	119	25				17	0	119	25
	12	0	119	653				12	0	119	653
	11	0	116	50				11	0	116	50
	1	57	113	90				4	0	115	139
	1	0	112	27				1	57	113	90
	1	0	112	594				1	0	112	27
			110	823				1	0	112	594
			110	261						110	823
			109	0						110	261
			107	80						109	0
			103	149						107	80
			102	262						106	484
			102	130						103	149
			101	90						102	262
			99	218						102	130
			97	208						101	90
			96	103						99	218
			95	41						97	208
			92	83						96	103
			91	71						95	41
			90	538						92	83
			89	347						91	71
			89	139						90	538
			89	26						89	347
			88	144						89	26
			87	534						88	144
			87	52						87	534
			87	160						87	52
			86	158						87	160
			84	249						86	158
			84	32						84	249
			81	6						84	32
			79	100						81	6
			78	484						79	100
			77	32						77	32
			77	71						77	71
			77	384						77	384
			76	39						76	39
			75	414						75	414
			74	221						74	221
			74	115						74	115
			73	95						73	95
			73	32						73	32
			69	90						69	90
			68	20						68	20
			67	26						67	26
			66	21						66	21
			63	161						63	161
			59	86						59	86
			56	52						56	52
			55	61						55	61
			54	53						54	53
			52	239						52	239
			52	71						52	71
			51	38						51	38
			51	138						51	138
			51	56						51	56
			51	62						51	62
			50	84						50	84
			48	176						48	176
			48	76						48	76
			46	22						46	22
			45	54						45	54
			44	91						44	0
			44	36						44	91
			43	162						44	36
			42	21						43	162
			41	799						42	21
			40	188						41	799
			40	192						40	188
			40	65						40	192
			39	26						40	65
			38	121						39	26
			37	64						38	121
			37	7						37	64
			37	32						37	7
			35	16						37	32
			34	48						35	16
			33	79						34	48
			33	90						33	79
			32	0						33	90
			32	55						32	55
			32	25						32	25
			30	65						30	65
			30	403						30	403
			29	43						29	43
			29	6						29	6
			29	46						29	46
			28	25						28	25
			27	57						27	57
			27	3						27	3
			26	15						26	15
			26	29						26	29
			25	111						25	111
			24	168						24	168
			24	16						24	16
			24	18						24	18
			24	23						24	23
			23	98						23	98
			23	42						23	42
			22	22						22	22
			22	7						22	7
			22	26						22	26
			20	8						20	8
			20	31						20	31
			19	52						19	52
			19	36						19	36
			17	22						17	22
			17	34						17	34
			16	0						16	0
			14	16						14	16
			14	1						14	1
			13	28						13	28
			12	0						12	0
			12	7						12	7
			12	0						12	0
			11	129						11	129
			10	5						10	5
			8	7						8	7
			6	2						6	2
			5	33						5	33
			4	14						4	14
			3	8						3	8
	171	13	288	282	107	41		172	13	288	282	107	41
	1649.56	42.6901	276.274	326.344	34.0187	4.93458		1640.2	42.4419	277.549	328.253	34.0187	4.93458
	97.412		-18.1231		85.4945			97.4124		-18.2688		85.4945

## Sheet: Legend
HEADER	DESCRIPTION
SubjectID	subject identifier expressed as TAXXX, ETXXX, LAXXX, BRXXX (TA, Tanzania; ET, Ethiopia; La, Laos; BR, Brazil)
Age	age of the subject expressed in years
Sex	sex of the subject: 1, male; 2, female
BL_KKA_AL	kato-katz slide A egg counts for Ascaris at baseline
BL_KKA_AL_QC	Result of the Quality control reading, if any.
BL_KKA_AL_postQC	Eventual result kept after QC (depending on the SwissTPH guidelines)
BL_KKA_TT	kato-katz slide A egg counts for Trichuris at baseline
BL_KKA_TT_QC	Result of the Quality control reading, if any.
BL_KKA_TT_postQC	Eventual result kept after QC (depending on the SwissTPH guidelines)
BL_KKA_HW	kato-katz slide A egg counts for Hookworm at baseline
BL_KKA_HW_QC	Result of the Quality control reading, if any.
BL_KKA_HW_postQC	Eventual result kept after QC (depending on the SwissTPH guidelines)
BL_KKB_AL	kato-katz slide B egg counts for Ascaris at baseline
BL_KKB_AL_QC	Result of the Quality control reading, if any.
BL_KKB_AL_PostQC	Eventual result kept after QC (depending on the SwissTPH guidelines)
BL_KKB_TT	kato-katz slide B egg counts for Trichuris at baseline
BL_KKB_TT_QC	Result of the Quality control reading, if any.
BL_KKB_TT_postQC	Eventual result kept after QC (depending on the SwissTPH guidelines)
BL_KKB_HW	kato-katz slide B egg counts for Hookworm at baseline
BL_KKB_HW_QC	Result of the Quality control reading, if any.
BL_KKB_HW_postQC	Eventual result kept after QC (depending on the SwissTPH guidelines)
FU_KKA_AL	kato-katz slide A egg counts for Ascaris at follow-up
FU_KKA_AL_QC	Result of the Quality control reading, if any.
FU_KKA_AL_postQC	Eventual result kept after QC (depending on the SwissTPH guidelines)
FU_KKA_TT	kato-katz slide A egg counts for Trichuris at follow-up
FU_KKA_TT_QC	Result of the Quality control reading, if any.
FU_KKA_TT_postQC	Eventual result kept after QC (depending on the SwissTPH guidelines)
FU_KKA_HW	kato-katz slide A egg counts for Hookworm at follow-up
FU_KKA_HW_QC	Result of the Quality control reading, if any.
FU_KKA_HW_postQC	Eventual result kept after QC (depending on the SwissTPH guidelines)
FU_KKB_AL	kato-katz slide B egg counts for Ascaris at follow-up
FU_KKB_AL_QC	Result of the Quality control reading, if any.
FU_KKB_AL_PostQC	Eventual result kept after QC (depending on the SwissTPH guidelines)
FU_KKB_TT	kato-katz slide B egg counts for Trichuris at follow-up
FU_KKB_TT_QC	Result of the Quality control reading, if any.
FU_KKB_TT_postQC	Eventual result kept after QC (depending on the SwissTPH guidelines)
FU_KKB_HW	kato-katz slide B egg counts for Hookworm at follow-up
FU_KKB_HW_QC	Result of the Quality control reading, if any.
FU_KKB_HW_postQC	Eventual result kept after QC (depending on the SwissTPH guidelines)
